# Supplementary material for: Effects of sleep and wake on astrocytes: clues from molecular and ultrastructural studies
Source: PubMed Central journal article supplement (PMC4548305; doi:10.1186/s12915-015-0176-7), 2015-08-25
Supplement: 12915_2015_176_MOESM1_ESM.pdf [file 12915_2015_176_MOESM1_ESM.pdf]

Table 1. Astrocyte genes upregulated because of time of day (3 am) (fold change>30%, p<0.01)

| Probeset ID  | Gene Name     | Gene Title                                                                 | W vs. S+SD (3 am vs. 3 pm) |                    | W vs. S         |        |           | W vs. SD        |        |           |
|--------------|---------------|----------------------------------------------------------------------------|----------------------------|--------------------|-----------------|--------|-----------|-----------------|--------|-----------|
|              |               |                                                                            | Average Log Fold Change    | Average Expression | Log Fold Change | t      | adj.P.Val | Log Fold Change | t      | adj.P.Val |
| 1444559_at   | Phtf2         | Putative homeodomain transcription factor 2                                | -1.79                      | 4.06               | -1.80           | -6.62  | 0.0005    | -1.79           | -6.59  | 0.0007    |
| 1447552_s_at | Unknown       | Unknown                                                                    | -1.75                      | 3.24               | -1.97           | -6.77  | 0.0004    | -1.53           | -5.24  | 0.0043    |
| 1446761_at   | D8Ertd56e     | DUnknown segment, Chr 8, ERATO Doi 56, expressed                           | -1.74                      | 3.33               | -1.80           | -8.84  | 0.0000    | -1.68           | -8.23  | 0.0001    |
| 1458620_at   | Gm5129        | predicted gene 5129                                                        | -1.65                      | 5.38               | -1.69           | -7.26  | 0.0002    | -1.60           | -6.85  | 0.0005    |
| 1422530_at   | Prph          | peripherin                                                                 | -1.62                      | 4.06               | -1.78           | -6.87  | 0.0003    | -1.45           | -5.58  | 0.0028    |
| 1435560_at   | Itgal         | integrin alpha L                                                           | -1.60                      | 3.85               | -2.10           | -12.95 | 0.0000    | -1.10           | -6.79  | 0.0005    |
| 1429955_at   | 5031434O11Rik | RIKEN cDNA 5031434O11 gene                                                 | -1.57                      | 4.48               | -1.12           | -5.72  | 0.0016    | -2.03           | -10.41 | 0.0000    |
| 1445505_at   | Ndst1         | N-deacetylase/N-sulfotransferase (heparan glucosaminyl) 1                  | -1.47                      | 3.59               | -1.64           | -7.27  | 0.0002    | -1.29           | -5.71  | 0.0023    |
| 1444207_at   | Alms1         | Alstrom syndrome 1 homolog (human)                                         | -1.46                      | 3.63               | -1.67           | -7.03  | 0.0003    | -1.24           | -5.20  | 0.0046    |
| 1440862_at   | Unknown       | Unknown                                                                    | -1.42                      | 4.48               | -1.46           | -5.96  | 0.0012    | -1.39           | -5.65  | 0.0025    |
| 1459255_at   | Unknown       | Unknown                                                                    | -1.39                      | 3.17               | -1.44           | -7.70  | 0.0001    | -1.35           | -7.19  | 0.0003    |
| 1438515_at   | Zfp207        | zinc finger protein 207                                                    | -1.30                      | 4.67               | -1.36           | -5.69  | 0.0017    | -1.25           | -5.24  | 0.0043    |
| 1456681_at   | Ptchd1        | patched domain containing 1                                                | -1.28                      | 6.05               | -1.40           | -7.75  | 0.0001    | -1.17           | -6.49  | 0.0008    |
| 1430330_at   | Wiz           | widely-interspaced zinc finger motifs                                      | -1.27                      | 3.53               | -1.33           | -6.76  | 0.0004    | -1.20           | -6.07  | 0.0013    |
| 1446175_at   | Unknown       | Unknown                                                                    | -1.22                      | 3.48               | -1.32           | -10.50 | 0.0000    | -1.12           | -8.90  | 0.0001    |
| 1425669_at   | Mobk12b       | MOB1, Mps One Binder kinase activator-like 2B (yeast)                      | -1.19                      | 3.94               | -0.77           | -4.73  | 0.0063    | -1.61           | -9.92  | 0.0000    |
| 1444269_at   | Unknown       | Unknown                                                                    | -1.18                      | 3.68               | -0.86           | -4.69  | 0.0067    | -1.49           | -8.11  | 0.0001    |
| 1431362_a_at | Smoc2         | SPARC related modular calcium binding 2                                    | -1.17                      | 4.61               | -1.07           | -5.30  | 0.0028    | -1.27           | -6.29  | 0.0010    |
| 1453395_at   | 5330403D14Rik | RIKEN cDNA 5330403D14 gene                                                 | -1.17                      | 3.82               | -1.10           | -7.28  | 0.0002    | -1.24           | -8.22  | 0.0001    |
| 1437370_at   | Sgol2         | shugoshin-like 2 (S. pombe)                                                | -1.17                      | 4.15               | -1.16           | -4.97  | 0.0045    | -1.17           | -5.01  | 0.0062    |
| 1421686_at   | Npvf          | neuropeptide VF precursor                                                  | -1.16                      | 4.43               | -1.21           | -9.95  | 0.0000    | -1.11           | -9.11  | 0.0000    |
| 1427618_at   | Cdh9          | cadherin 9                                                                 | -1.15                      | 3.61               | -1.07           | -5.59  | 0.0019    | -1.23           | -6.43  | 0.0008    |
| 1458755_at   | Unknown       | Unknown                                                                    | -1.14                      | 3.04               | -1.29           | -9.21  | 0.0000    | -0.99           | -7.06  | 0.0004    |
| 1444308_at   | Unknown       | Unknown                                                                    | -1.13                      | 4.78               | -1.17           | -6.17  | 0.0009    | -1.09           | -5.74  | 0.0022    |
| 1441074_at   | Unknown       | Unknown                                                                    | -1.12                      | 4.40               | -1.05           | -6.86  | 0.0004    | -1.19           | -7.74  | 0.0002    |
| 1460073_at   | Unknown       | Unknown                                                                    | -1.09                      | 3.90               | -0.89           | -4.54  | 0.0084    | -1.29           | -6.57  | 0.0007    |
| 1420991_at   | Ankrd1        | ankyrin repeat domain 1 (cardiac muscle)                                   | -1.08                      | 3.67               | -1.36           | -12.30 | 0.0000    | -0.80           | -7.20  | 0.0003    |
| 1435794_at   | BC050254      | cDNA sequence BC050254                                                     | -1.08                      | 5.84               | -0.98           | -4.77  | 0.0060    | -1.18           | -5.75  | 0.0021    |
| 1427497_at   | 2610015P09Rik | RIKEN cDNA 2610015P09 gene                                                 | -1.05                      | 4.38               | -1.00           | -7.96  | 0.0001    | -1.10           | -8.77  | 0.0001    |
| 1448577_x_at | Syngn2        | synaptogyrin 2                                                             | -1.04                      | 7.39               | -0.93           | -4.52  | 0.0086    | -1.15           | -5.61  | 0.0026    |
| 1419717_at   | Sema3e        | sema domain, immunoglobulin domain (Ig), short basic domain, secreted      | -1.03                      | 3.23               | -1.16           | -6.24  | 0.0008    | -0.91           | -4.90  | 0.0073    |
| 1440048_at   | Smarca5       | SWI/SNF related, matrix associated, actin dependent regulator of chromatin | -1.02                      | 3.19               | -1.05           | -7.11  | 0.0003    | -1.00           | -6.72  | 0.0006    |
| 1439929_at   | Unknown       | Unknown                                                                    | -1.02                      | 2.96               | -1.18           | -11.05 | 0.0000    | -0.87           | -8.16  | 0.0001    |
| 1423473_at   | Sept2         | septin 2                                                                   | -1.02                      | 2.96               | -1.06           | -6.23  | 0.0008    | -0.98           | -5.77  | 0.0020    |
| 1457093_at   | Gapvd1        | GTPase activating protein and VPS9 domains 1                               | -1.02                      | 3.58               | -0.88           | -6.14  | 0.0009    | -1.15           | -7.98  | 0.0002    |
| 1454361_at   | 9230106L01Rik | RIKEN cDNA 9230106L01 gene                                                 | -1.01                      | 3.28               | -0.87           | -5.10  | 0.0038    | -1.16           | -6.81  | 0.0005    |
| 1437326_x_at | Cela3b        | chymotrypsin-like elastase family, member 3B                               | -1.00                      | 3.86               | -1.30           | -11.87 | 0.0000    | -0.69           | -6.34  | 0.0009    |
| 1429402_at   | Glt8d2        | glycosyltransferase 8 domain containing 2                                  | -0.99                      | 5.41               | -1.12           | -6.26  | 0.0008    | -0.86           | -4.82  | 0.0082    |
| 1431038_at   | Rassf4        | Ras association (RalGDS/AF-6) domain family member 4                       | -0.97                      | 3.34               | -0.98           | -5.66  | 0.0017    | -0.97           | -5.59  | 0.0027    |
| 1447080_at   | Aco1          | aconitase 1                                                                | -0.97                      | 4.50               | -1.13           | -7.79  | 0.0001    | -0.81           | -5.60  | 0.0027    |
| 1427756_x_at | Igh-6         | Immunoglobulin heavy chain 6 (heavy chain of IgM)                          | -0.97                      | 3.68               | -1.13           | -7.48  | 0.0002    | -0.81           | -5.39  | 0.0035    |
| 1444354_at   | Unknown       | Unknown                                                                    | -0.97                      | 4.69               | -1.06           | -10.52 | 0.0000    | -0.87           | -8.66  | 0.0001    |
| 1430436_at   | Fam115a       | family with sequence similarity 115, member A                              | -0.96                      | 3.09               | -0.82           | -5.08  | 0.0038    | -1.10           | -6.78  | 0.0005    |
| 1431564_at   | Bcar3         | breast cancer anti-estrogen resistance 3                                   | -0.95                      | 3.60               | -1.02           | -6.53  | 0.0005    | -0.89           | -5.73  | 0.0022    |
| 1446628_at   | Unknown       | Unknown                                                                    | -0.95                      | 4.08               | -1.08           | -10.53 | 0.0000    | -0.83           | -8.08  | 0.0001    |
| 1449572_at   | Trhr          | thyrotropin releasing hormone receptor                                     | -0.94                      | 3.24               | -1.03           | -5.97  | 0.0012    | -0.85           | -4.92  | 0.0070    |
| 1423714_at   | Asf1b         | ASF1 anti-silencing function 1 homolog B (S. cerevisiae)                   | -0.91                      | 5.10               | -1.09           | -7.33  | 0.0002    | -0.74           | -5.01  | 0.0061    |
| 1431263_at   | Prkag2        | protein kinase, AMP-activated, gamma 2 non-catalytic subunit               | -0.91                      | 3.09               | -0.84           | -6.35  | 0.0007    | -0.99           | -7.51  | 0.0002    |
| 1440711_at   | C630001G18Rik | RIKEN cDNA C630001G18 gene                                                 | -0.90                      | 3.22               | -0.79           | -5.12  | 0.0036    | -1.01           | -6.58  | 0.0007    |
| 1445149_at   | Pvr           | Poliiovirus receptor                                                       | -0.89                      | 4.11               | -0.98           | -8.43  | 0.0001    | -0.80           | -6.87  | 0.0005    |
| 1422942_at   | Galr2         | galanin receptor 2                                                         | -0.88                      | 3.97               | -0.77           | -4.51  | 0.0088    | -0.99           | -5.83  | 0.0019    |
| 1417878_at   | E2f1          | E2F transcription factor 1                                                 | -0.88                      | 6.82               | -0.87           | -4.58  | 0.0080    | -0.89           | -4.72  | 0.0093    |
| 1447851_x_at | Atp10a        | ATPase, class V, type 10A                                                  | -0.88                      | 4.62               | -0.85           | -5.18  | 0.0033    | -0.90           | -5.50  | 0.0030    |
| 1430299_at   | Tsc22d4       | TSC22 domain family, member 4                                              | -0.87                      | 6.75               | -0.94           | -5.88  | 0.0013    | -0.79           | -4.95  | 0.0068    |

|              |               |                                                     |
|--------------|---------------|-----------------------------------------------------|
| 1442467_at   | Nav2          | neuron navigator 2                                  |
| 1441155_at   | Unknown       | Unknown                                             |
| 1443121_at   | Calcoco1      | Calcium binding and coiled coil domain 1            |
| 1441441_at   | Prg1          | proline rich Gla (G-carboxyglutamic acid) 1         |
| 1447642_x_at | Dmwd          | dystrophia myotonica-containing WD repeat motif     |
| 1446751_s_at | Impact        | imprinted and ancient                               |
| 1418286_a_at | Efnb1         | ephrin B1                                           |
| 1442331_at   | Unknown       | Unknown                                             |
| 1432578_at   | Naif1         | nuclear apoptosis inducing factor 1                 |
| 1458058_at   | 7030407E18Rik | RIKEN cDNA 7030407E18 gene                          |
| 1449866_at   | Syt2          | synaptotagmin II                                    |
| 1432626_at   | 5730507A11Rik | RIKEN cDNA 5730507A11 gene                          |
| 1424493_s_at | Ugt3a1        | UDP glycosyltransferases 3 family, polypeptide A1   |
| 1442081_at   | Gm4632        | Predicted gene 4632                                 |
| 1432500_at   | 2410006F04Rik | RIKEN cDNA 2410006F04 gene                          |
| 1451534_at   | Scgn          | secretagogin, EF-hand calcium binding protein       |
| 1442573_at   | Unknown       | Unknown                                             |
| 1422802_at   | Defa3         | defensin, alpha, 3                                  |
| 1432281_a_at | Itgb6         | integrin beta 6                                     |
| 1417852_x_at | Clca1         | chloride channel calcium activated 1                |
| 1455838_at   | Slnf1         | schlafen like 1                                     |
| 1451951_at   | Igkv14-111    | Immunoglobulin kappa chain variable 14-111          |
| 1446813_s_at | D5Ert0560e    | DUnknown segment, Chr 5, ERATO Doi 560, expressed   |
| 1442405_at   | Csrp2bp       | Cysteine and glycine-rich protein 2 binding protein |
| 1442228_at   | Unknown       | Unknown                                             |
| 1436932_at   | Grlh3         | grainyhead-like 3 (Drosophila)                      |
| 1459892_at   | Psg19         | pregnancy specific glycoprotein 19                  |
| 1430653_at   | A930026B05Rik | RIKEN cDNA A930026B05 gene                          |
| 1444932_at   | 4732419C18Rik | RIKEN cDNA 4732419C18 gene                          |
| 1443025_at   | Unknown       | Unknown                                             |
| 1420061_s_at | AA675344      | expressed sequence AA675344                         |
| 1440124_at   | B230334C09Rik | RIKEN cDNA B230334C09 gene                          |
| 1438779_at   | Col4a3        | collagen, type IV, alpha 3                          |
| 1458495_at   | Unknown       | Unknown                                             |
| 1432751_at   | 4930403O18Rik | RIKEN cDNA 4930403O18 gene                          |
| 1447245_at   | Unknown       | Unknown                                             |
| 1420784_at   | Scn11a        | sodium channel, voltage-gated, type XI, alpha       |
| 1459735_at   | Fkbp15        | FK506 binding protein 15                            |
| 1444747_at   | Unknown       | Unknown                                             |
| 1447134_at   | Unknown       | Unknown                                             |
| 1442629_at   | Unknown       | Unknown                                             |
| 1429858_at   | 1700011E24Rik | RIKEN cDNA 1700011E24 gene                          |
| 1444536_at   | Unknown       | Unknown                                             |
| 1446027_at   | Unknown       | Unknown                                             |
| 1450578_at   | Sry           | sex determining region of Chr Y                     |
| 1442485_at   | Unknown       | Unknown                                             |
| 1449081_at   | Ces3          | carboxylesterase 3                                  |
| 1454129_at   | 4933416M06Rik | RIKEN cDNA 4933416M06 gene                          |
| 1423147_at   | Mat1a         | methionine adenosyltransferase I, alpha             |

|       |      |       |       |        |       |        |        |
|-------|------|-------|-------|--------|-------|--------|--------|
| -0.86 | 3.90 | -1.05 | -8.60 | 0.0001 | -0.68 | -5.58  | 0.0028 |
| -0.86 | 3.24 | -0.99 | -8.64 | 0.0001 | -0.72 | -6.30  | 0.0010 |
| -0.84 | 4.47 | -1.02 | -7.90 | 0.0001 | -0.67 | -5.24  | 0.0043 |
| -0.84 | 3.33 | -0.78 | -4.75 | 0.0062 | -0.91 | -5.57  | 0.0028 |
| -0.84 | 3.13 | -0.94 | -7.20 | 0.0002 | -0.75 | -5.73  | 0.0022 |
| -0.84 | 6.55 | -0.80 | -5.20 | 0.0032 | -0.89 | -5.81  | 0.0019 |
| -0.82 | 6.97 | -0.93 | -6.29 | 0.0008 | -0.70 | -4.73  | 0.0092 |
| -0.81 | 3.72 | -0.73 | -6.67 | 0.0005 | -0.88 | -8.01  | 0.0001 |
| -0.79 | 5.89 | -0.88 | -7.81 | 0.0001 | -0.71 | -6.30  | 0.0010 |
| -0.79 | 3.76 | -0.90 | -6.64 | 0.0005 | -0.68 | -5.01  | 0.0062 |
| -0.78 | 4.90 | -0.77 | -5.22 | 0.0031 | -0.78 | -5.27  | 0.0041 |
| -0.77 | 4.00 | -0.75 | -7.43 | 0.0002 | -0.79 | -7.80  | 0.0002 |
| -0.77 | 4.08 | -0.97 | -9.78 | 0.0000 | -0.56 | -5.61  | 0.0026 |
| -0.77 | 4.51 | -0.66 | -5.15 | 0.0035 | -0.87 | -6.75  | 0.0005 |
| -0.75 | 2.93 | -0.71 | -6.57 | 0.0005 | -0.79 | -7.27  | 0.0003 |
| -0.75 | 4.47 | -0.90 | -7.19 | 0.0002 | -0.60 | -4.82  | 0.0082 |
| -0.75 | 3.22 | -0.77 | -7.40 | 0.0002 | -0.72 | -6.95  | 0.0004 |
| -0.75 | 3.77 | -0.73 | -5.29 | 0.0029 | -0.76 | -5.55  | 0.0029 |
| -0.74 | 2.94 | -0.95 | -9.99 | 0.0000 | -0.53 | -5.56  | 0.0028 |
| -0.74 | 2.81 | -0.63 | -5.73 | 0.0016 | -0.85 | -7.79  | 0.0002 |
| -0.74 | 4.99 | -0.96 | -8.81 | 0.0000 | -0.52 | -4.72  | 0.0093 |
| -0.74 | 3.84 | -0.74 | -7.59 | 0.0001 | -0.73 | -7.46  | 0.0003 |
| -0.74 | 3.09 | -0.79 | -8.26 | 0.0001 | -0.68 | -7.04  | 0.0004 |
| -0.73 | 3.62 | -0.84 | -7.73 | 0.0001 | -0.62 | -5.68  | 0.0023 |
| -0.73 | 3.45 | -0.44 | -4.45 | 0.0095 | -1.02 | -10.26 | 0.0000 |
| -0.71 | 3.55 | -0.72 | -4.90 | 0.0049 | -0.70 | -4.76  | 0.0089 |
| -0.71 | 2.57 | -0.72 | -6.97 | 0.0003 | -0.69 | -6.68  | 0.0006 |
| -0.71 | 4.61 | -0.61 | -4.49 | 0.0090 | -0.81 | -5.97  | 0.0015 |
| -0.71 | 4.83 | -0.73 | -5.07 | 0.0038 | -0.68 | -4.67  | 0.0100 |
| -0.70 | 3.31 | -0.70 | -4.98 | 0.0044 | -0.70 | -4.99  | 0.0064 |
| -0.70 | 2.64 | -0.79 | -6.51 | 0.0006 | -0.62 | -5.09  | 0.0054 |
| -0.70 | 3.42 | -0.75 | -5.95 | 0.0012 | -0.65 | -5.16  | 0.0049 |
| -0.70 | 3.44 | -0.70 | -5.52 | 0.0021 | -0.70 | -5.50  | 0.0030 |
| -0.69 | 4.20 | -0.93 | -9.54 | 0.0000 | -0.46 | -4.74  | 0.0091 |
| -0.69 | 3.59 | -0.79 | -6.75 | 0.0004 | -0.59 | -5.04  | 0.0059 |
| -0.69 | 4.19 | -0.84 | -7.78 | 0.0001 | -0.54 | -4.96  | 0.0066 |
| -0.67 | 3.84 | -0.68 | -4.91 | 0.0048 | -0.66 | -4.77  | 0.0087 |
| -0.66 | 4.03 | -0.74 | -6.22 | 0.0008 | -0.58 | -4.82  | 0.0082 |
| -0.66 | 2.76 | -0.78 | -8.43 | 0.0001 | -0.54 | -5.87  | 0.0018 |
| -0.66 | 3.59 | -0.59 | -4.53 | 0.0085 | -0.72 | -5.51  | 0.0030 |
| -0.66 | 3.61 | -0.74 | -6.14 | 0.0009 | -0.58 | -4.78  | 0.0086 |
| -0.62 | 4.39 | -0.57 | -5.66 | 0.0017 | -0.67 | -6.61  | 0.0007 |
| -0.61 | 3.65 | -0.68 | -5.91 | 0.0013 | -0.54 | -4.70  | 0.0096 |
| -0.61 | 4.45 | -0.56 | -4.48 | 0.0091 | -0.67 | -5.37  | 0.0036 |
| -0.60 | 3.14 | -0.65 | -5.85 | 0.0014 | -0.54 | -4.89  | 0.0074 |
| -0.58 | 3.45 | -0.45 | -4.54 | 0.0084 | -0.71 | -7.11  | 0.0004 |
| -0.57 | 2.57 | -0.56 | -6.02 | 0.0011 | -0.58 | -6.24  | 0.0011 |
| -0.54 | 4.67 | -0.54 | -4.89 | 0.0049 | -0.53 | -4.84  | 0.0081 |
| -0.53 | 3.38 | -0.62 | -6.92 | 0.0003 | -0.44 | -4.96  | 0.0067 |
