# Supplementary material for: Effects of sleep and wake on astrocytes: clues from molecular and ultrastructural studies
Source: PubMed Central journal article supplement (PMC4548305; doi:10.1186/s12915-015-0176-7), 2015-08-25
Supplement: 12915_2015_176_MOESM2_ESM.pdf [file 12915_2015_176_MOESM2_ESM.pdf]

Table 2. Astrocyte genes upregulated because of time of day (3 pm) (fold change>30%, p<0.01)

| Probeset ID  | Gene Name     | Gene Title                                                                    | S+SD vs. W (3 am vs. 3 pm) |                    | S vs. W         |       |           | SD vs. W        |       |           |
|--------------|---------------|-------------------------------------------------------------------------------|----------------------------|--------------------|-----------------|-------|-----------|-----------------|-------|-----------|
|              |               |                                                                               | Average Log Fold Change    | Average Expression | Log Fold Change | t     | adj.P.Val | Log Fold Change | t     | adj.P.Val |
| 1456182_x_at | Mela          | melanoma antigen                                                              | 2.31                       | 6.32               | 1.90            | 6.14  | 0.0009    | 2.73            | 8.81  | 0.0001    |
| 1424784_at   | Gm13139       | predicted gene 13139                                                          | 2.08                       | 4.96               | 2.19            | 6.82  | 0.0004    | 1.97            | 6.14  | 0.0012    |
| 1438750_at   | Atrx          | Alpha thalassemia/mental retardation syndrome X-linked homolog (human)        | 1.65                       | 3.27               | 1.38            | 5.02  | 0.0042    | 1.92            | 6.97  | 0.0004    |
| 1458677_at   | Entpd5        | ectonucleoside triphosphate diphosphohydrolase 5                              | 1.65                       | 4.66               | 1.94            | 8.32  | 0.0001    | 1.35            | 5.80  | 0.0020    |
| 1449143_at   | Rtp4          | receptor transporter protein 4                                                | 1.48                       | 5.31               | 1.31            | 5.76  | 0.0015    | 1.65            | 7.24  | 0.0003    |
| 1447224_at   | Unknown       | Unknown                                                                       | 1.20                       | 3.49               | 1.29            | 8.83  | 0.0000    | 1.11            | 7.57  | 0.0002    |
| 1427054_s_at | Abi3bp        | ABI gene family, member 3 (NESH) binding protein                              | 1.19                       | 3.03               | 1.46            | 7.61  | 0.0001    | 0.92            | 4.81  | 0.0082    |
| 1431046_at   | Ppfia3        | protein tyrosine phosphatase, receptor type, f polypeptide (PTPRF)            | 1.16                       | 6.57               | 1.19            | 10.36 | 0.0000    | 1.12            | 9.76  | 0.0000    |
| 1439376_x_at | Dmtf1         | cyclin D binding myb-like transcription factor 1                              | 1.11                       | 5.06               | 0.97            | 4.98  | 0.0044    | 1.25            | 6.40  | 0.0009    |
| 1455520_at   | Ppp2r5c       | protein phosphatase 2, regulatory subunit B (B56), gamma isoform              | 1.02                       | 5.18               | 1.08            | 7.02  | 0.0003    | 0.96            | 6.25  | 0.0011    |
| 1440926_at   | Flt1          | FMS-like tyrosine kinase 1                                                    | 1.02                       | 4.08               | 0.96            | 4.80  | 0.0057    | 1.07            | 5.37  | 0.0036    |
| 1445182_at   | Zfp672        | Zinc finger protein 672                                                       | 0.99                       | 3.17               | 0.87            | 6.17  | 0.0009    | 1.11            | 7.88  | 0.0002    |
| 1446655_at   | Scyl3         | SCY1-like 3 (S. cerevisiae)                                                   | 0.99                       | 5.54               | 0.86            | 7.88  | 0.0001    | 1.11            | 10.15 | 0.0000    |
| 1431819_at   | Unknown       | Unknown                                                                       | 0.94                       | 5.76               | 1.19            | 8.27  | 0.0001    | 0.68            | 4.73  | 0.0092    |
| 1432672_at   | 4933407A17Rik | RIKEN cDNA 4933407A17 gene                                                    | 0.93                       | 3.69               | 1.20            | 9.98  | 0.0000    | 0.67            | 5.55  | 0.0029    |
| 1442544_at   | Igh-6         | Immunoglobulin heavy chain 6 (heavy chain of IgM)                             | 0.92                       | 3.17               | 0.88            | 7.86  | 0.0001    | 0.97            | 8.58  | 0.0001    |
| 1422033_a_at | Cntf          | ciliary neurotrophic factor                                                   | 0.92                       | 6.97               | 0.99            | 5.94  | 0.0012    | 0.84            | 5.04  | 0.0059    |
| 1445326_at   | Sdk1          | sidekick homolog 1 (chicken)                                                  | 0.90                       | 4.64               | 0.73            | 4.70  | 0.0067    | 1.08            | 6.98  | 0.0004    |
| 1437906_x_at | Txn1l         | thioredoxin-like 1                                                            | 0.90                       | 3.23               | 0.54            | 5.13  | 0.0036    | 1.26            | 12.05 | 0.0000    |
| 1426925_at   | Rc3h2         | ring finger and CCCH-type zinc finger domains 2                               | 0.89                       | 2.91               | 0.94            | 5.91  | 0.0013    | 0.84            | 5.25  | 0.0043    |
| 1439709_at   | Unknown       | Unknown                                                                       | 0.88                       | 3.15               | 0.54            | 5.65  | 0.0017    | 1.23            | 12.90 | 0.0000    |
| 1457789_at   | Cln3          | ceroid lipofuscinosis, neuronal 3, juvenile (Batten, Spielmeyer-Vogt disease) | 0.88                       | 3.87               | 0.88            | 5.83  | 0.0014    | 0.88            | 5.79  | 0.0020    |
| 1432424_at   | 4930505H01Rik | RIKEN cDNA 4930505H01 gene                                                    | 0.87                       | 5.53               | 0.74            | 5.32  | 0.0028    | 1.00            | 7.23  | 0.0003    |
| 1440658_at   | Ammecr1l      | AMME chromosomal region gene 1-like                                           | 0.86                       | 3.32               | 0.83            | 4.72  | 0.0065    | 0.90            | 5.08  | 0.0055    |
| 1458556_at   | Unknown       | Unknown                                                                       | 0.86                       | 2.81               | 0.90            | 10.77 | 0.0000    | 0.82            | 9.73  | 0.0000    |
| 1425559_a_at | Acsm3         | acyl-CoA synthetase medium-chain family member 3                              | 0.85                       | 6.14               | 0.97            | 7.33  | 0.0002    | 0.73            | 5.57  | 0.0028    |
| 1454762_at   | Xkxr          | X Kell blood group precursor related X linked                                 | 0.84                       | 5.42               | 0.78            | 5.30  | 0.0028    | 0.91            | 6.15  | 0.0012    |
| 1421173_at   | Irf4          | interferon regulatory factor 4                                                | 0.83                       | 3.56               | 0.85            | 5.12  | 0.0036    | 0.80            | 4.82  | 0.0082    |
| 1453841_at   | 2310050P20Rik | RIKEN cDNA 2310050P20 gene                                                    | 0.81                       | 2.80               | 0.52            | 4.88  | 0.0051    | 1.09            | 10.28 | 0.0000    |
| 1438793_x_at | Ergic1        | endoplasmic reticulum-golgi intermediate compartment (ERGIC) 1                | 0.78                       | 3.24               | 0.54            | 5.27  | 0.0029    | 1.02            | 9.90  | 0.0000    |
| 1454262_at   | Fbxw27        | F-box and WD-40 domain protein 27                                             | 0.77                       | 3.74               | 0.78            | 7.14  | 0.0002    | 0.76            | 6.96  | 0.0004    |
| 1416155_at   | Hmgb3         | high mobility group box 3                                                     | 0.75                       | 10.01              | 0.65            | 4.73  | 0.0064    | 0.84            | 6.12  | 0.0012    |
| 1444757_at   | Unknown       | Unknown                                                                       | 0.74                       | 3.11               | 0.62            | 4.98  | 0.0044    | 0.86            | 6.92  | 0.0004    |
| 1440114_x_at | Kank3         | KN motif and ankyrin repeat domains 3                                         | 0.72                       | 3.71               | 0.82            | 7.36  | 0.0002    | 0.62            | 5.63  | 0.0025    |
| 1424410_at   | Ttc8          | tetratricopeptide repeat domain 8                                             | 0.72                       | 8.13               | 0.71            | 5.21  | 0.0032    | 0.72            | 5.26  | 0.0042    |
| 1456134_x_at | Yif1a         | Yip1 interacting factor homolog A (S. cerevisiae)                             | 0.71                       | 3.51               | 0.58            | 6.69  | 0.0004    | 0.83            | 9.59  | 0.0000    |
| 1444642_at   | Unknown       | Unknown                                                                       | 0.70                       | 4.26               | 0.54            | 4.47  | 0.0092    | 0.86            | 7.17  | 0.0003    |
| 1447492_at   | Unknown       | Unknown                                                                       | 0.69                       | 3.67               | 0.75            | 6.28  | 0.0008    | 0.63            | 5.35  | 0.0037    |
| 1430182_a_at | 1700006J14Rik | RIKEN cDNA 1700006J14 gene                                                    | 0.67                       | 2.75               | 0.71            | 6.10  | 0.0010    | 0.63            | 5.35  | 0.0037    |
| 1444023_at   | Ank2          | ankyrin 2, brain                                                              | 0.65                       | 2.45               | 0.62            | 4.69  | 0.0068    | 0.69            | 5.20  | 0.0046    |
| 1459225_at   | Gnl3l         | Guanine nucleotide binding protein-like 3 (nucleolar)-like                    | 0.64                       | 2.69               | 0.73            | 7.99  | 0.0001    | 0.55            | 6.07  | 0.0013    |
| 1450597_at   | Olfir870      | olfactory receptor 870                                                        | 0.63                       | 3.35               | 0.53            | 4.53  | 0.0084    | 0.73            | 6.16  | 0.0012    |
| 1420164_at   | D7Etd183e     | DUnknown segment, Chr 7, ERATO Doi 183, expressed                             | 0.63                       | 3.48               | 0.51            | 4.93  | 0.0047    | 0.74            | 7.11  | 0.0004    |
| 1440935_at   | Unknown       | Unknown                                                                       | 0.59                       | 4.48               | 0.55            | 5.90  | 0.0013    | 0.63            | 6.76  | 0.0005    |
| 1429991_at   | Fezf1         | Fez family zinc finger 1                                                      | 0.59                       | 4.07               | 0.66            | 7.03  | 0.0003    | 0.51            | 5.35  | 0.0037    |
| 1420161_at   | AA409749      | expressed sequence AA409749                                                   | 0.56                       | 4.11               | 0.61            | 7.07  | 0.0003    | 0.52            | 6.03  | 0.0014    |
| 1437425_at   | Gdap1         | ganglioside-induced differentiation-associated-protein 1                      | 0.55                       | 4.85               | 0.49            | 5.02  | 0.0042    | 0.61            | 6.24  | 0.0011    |
| 1459097_at   | Unknown       | Unknown                                                                       | 0.55                       | 3.38               | 0.54            | 4.95  | 0.0046    | 0.56            | 5.19  | 0.0047    |
| 1445187_at   | 9430070O13Rik | RIKEN cDNA 9430070O13 gene                                                    | 0.53                       | 2.60               | 0.58            | 5.63  | 0.0018    | 0.48            | 4.69  | 0.0097    |
