# Supplementary material for: Effects of sleep and wake on astrocytes: clues from molecular and ultrastructural studies
Source: PubMed Central journal article supplement (PMC4548305; doi:10.1186/s12915-015-0176-7), 2015-08-25
Supplement: 12915_2015_176_MOESM3_ESM.pdf [file 12915_2015_176_MOESM3_ESM.pdf]

Table 3. Astrocyte genes upregulated in S vs W + SD (fold change>30%, p<0.01)

| Probeset ID  | Gene Name     | Gene Title                                                            | S vs. W + SD            |                    | S vs. W         |       |           | S vs. SD        |       |           |
|--------------|---------------|-----------------------------------------------------------------------|-------------------------|--------------------|-----------------|-------|-----------|-----------------|-------|-----------|
|              |               |                                                                       | Average Log Fold Change | Average Expression | Log Fold Change | t     | adj.P.Val | Log Fold Change | t     | adj.P.Val |
| 1419728_at   | Cxcl5         | chemokine (C-X-C motif) ligand 5                                      | 1.86                    | 3.93               | 2.05            | 8.37  | 6.23E-05  | 1.68            | 6.83  | 2.41E-04  |
| 1419833_s_at | Arap3         | ArfGAP with RhoGAP domain, ankyrin repeat and PH domain 3             | 1.83                    | 4.14               | 1.57            | 5.37  | 2.54E-03  | 2.09            | 7.18  | 1.61E-04  |
| 1447962_at   | Unknown       | Unknown                                                               | 1.82                    | 3.45               | 1.75            | 6.25  | 8.14E-04  | 1.89            | 6.75  | 0.000269  |
| 1441048_at   | 5930430L01Rik | RIKEN cDNA 5930430L01 gene                                            | 1.75                    | 5.23               | 1.84            | 5.29  | 0.002859  | 1.67            | 4.82  | 4.21E-03  |
| 1436447_at   | A630026N12Rik | RIKEN cDNA A630026N12 gene                                            | 1.72                    | 3.48               | 1.53            | 6.69  | 4.41E-04  | 1.91            | 8.37  | 3.60E-05  |
| 1429572_at   | Nsun7         | NOL1/NOP2/Sun domain family, member 7                                 | 1.65                    | 4.50               | 1.40            | 5.30  | 2.84E-03  | 1.91            | 7.25  | 1.47E-04  |
| 1425772_at   | Col4a4        | collagen, type IV, alpha 4                                            | 1.53                    | 4.28               | 1.37            | 7.76  | 1.22E-04  | 1.68            | 9.50  | 1.16E-05  |
| 1442590_at   | Tnfrsf22      | tumor necrosis factor receptor superfamily, member 22                 | 1.51                    | 3.53               | 1.91            | 7.48  | 0.000165  | 1.12            | 4.40  | 7.88E-03  |
| 1416332_at   | Cirbp         | cold inducible RNA binding protein                                    | 1.41                    | 10.34              | 1.74            | 10.16 | 1.19E-05  | 1.09            | 6.36  | 0.00047   |
| 1427018_at   | Tsnaxip1      | translin-associated factor X (Tsnax) interacting protein 1            | 1.40                    | 4.46               | 1.59            | 10.69 | 8.67E-06  | 1.20            | 8.12  | 5.06E-05  |
| 1453402_at   | 6430500C12Rik | RIKEN cDNA 6430500C12 gene                                            | 1.36                    | 3.19               | 1.63            | 6.78  | 0.000391  | 1.09            | 4.54  | 6.31E-03  |
| 1417700_at   | Rab38         | RAB38, member of RAS oncogene family                                  | 1.33                    | 4.23               | 1.06            | 5.24  | 0.003039  | 1.60            | 7.89  | 6.62E-05  |
| 1425008_a_at | Iifi203       | interferon activated gene 203                                         | 1.30                    | 3.02               | 1.42            | 5.29  | 0.002868  | 1.19            | 4.44  | 7.38E-03  |
| 1445234_at   | C130030K03Rik | RIKEN cDNA C130030K03 gene                                            | 1.27                    | 3.12               | 1.25            | 5.63  | 0.001762  | 1.29            | 5.81  | 1.00E-03  |
| 1446274_at   | Slc16a1       | solute carrier family 16 (monocarboxylic acid transporters), member 1 | 1.26                    | 3.34               | 0.94            | 7.20  | 2.28E-04  | 1.59            | 12.25 | 1.31E-06  |
| 1445557_at   | 0610040B10Rik | RIKEN cDNA 0610040B10 gene                                            | 1.26                    | 4.63               | 1.17            | 7.69  | 0.000134  | 1.35            | 8.90  | 2.05E-05  |
| 1431524_at   | 4933427I22Rik | RIKEN cDNA 4933427I22 gene                                            | 1.25                    | 6.18               | 1.23            | 6.12  | 0.000969  | 1.27            | 6.36  | 4.70E-04  |
| 1450494_x_at | Ceacam1       | carcinoembryonic antigen-related cell adhesion molecule 1             | 1.24                    | 5.16               | 1.35            | 7.24  | 2.18E-04  | 1.14            | 6.14  | 0.000633  |
| 1428604_at   | 2610305D13Rik | RIKEN cDNA 2610305D13 gene                                            | 1.15                    | 3.13               | 1.14            | 5.93  | 0.001243  | 1.16            | 6.08  | 6.85E-04  |
| 1420389_at   | Pax3          | paired box gene 3                                                     | 1.13                    | 3.09               | 1.21            | 5.31  | 0.002808  | 1.05            | 4.63  | 5.58E-03  |
| 1433814_at   | Fbxl14        | F-box and leucine-rich repeat protein 14                              | 1.10                    | 3.61               | 1.01            | 7.93  | 0.000102  | 1.20            | 9.43  | 1.25E-05  |
| 1430204_at   | 5033425G24Rik | RIKEN cDNA 5033425G24 gene                                            | 1.08                    | 3.09               | 1.03            | 4.54  | 8.37E-03  | 1.14            | 5.01  | 0.003216  |
| 1436035_at   | 3830431G21Rik | RIKEN cDNA 3830431G21 gene                                            | 1.06                    | 5.96               | 1.13            | 5.74  | 1.58E-03  | 0.99            | 5.05  | 3.03E-03  |
| 1417020_at   | Spata4        | spermatogenesis associated 4                                          | 1.06                    | 2.84               | 0.99            | 4.43  | 0.009812  | 1.13            | 5.03  | 0.003111  |
| 1426230_at   | Sphk2         | sphingosine kinase 2                                                  | 1.06                    | 11.57              | 0.92            | 6.19  | 8.95E-04  | 1.19            | 8.02  | 5.6E-05   |
| 1420444_at   | Slc22a3       | solute carrier family 22 (organic cation transporter), member 3       | 1.04                    | 5.03               | 1.12            | 5.48  | 2.18E-03  | 0.96            | 4.72  | 4.89E-03  |
| 1418174_at   | Dbp           | D site albumin promoter binding protein                               | 1.01                    | 11.20              | 0.98            | 5.56  | 1.95E-03  | 1.04            | 5.93  | 8.26E-04  |
| 1442767_s_at | Uba1          | ubiquitin-like modifier activating enzyme 1                           | 0.97                    | 3.29               | 0.77            | 4.84  | 0.005361  | 1.18            | 7.43  | 1.20E-04  |
| 1453797_at   | Phospho2      | phosphatase, orphan 2                                                 | 0.96                    | 7.32               | 1.01            | 6.02  | 1.10E-03  | 0.91            | 5.47  | 1.63E-03  |
| 1430128_a_at | Reep6         | receptor accessory protein 6                                          | 0.95                    | 8.04               | 0.97            | 4.54  | 8.37E-03  | 0.93            | 4.36  | 8.35E-03  |
| 1449178_at   | Pdlim3        | PDZ and LIM domain 3                                                  | 0.95                    | 4.55               | 1.07            | 6.57  | 0.00052   | 0.83            | 5.11  | 2.78E-03  |
| 1418438_at   | Fabp2         | fatty acid binding protein 2, intestinal                              | 0.92                    | 3.11               | 1.05            | 8.03  | 9.33E-05  | 0.78            | 5.92  | 8.33E-04  |
| 1448975_s_at | Ren1          | renin 1 structural                                                    | 0.91                    | 2.94               | 0.97            | 6.64  | 0.000471  | 0.85            | 5.77  | 0.001055  |
| 1456366_at   | 1700015F17Rik | RIKEN cDNA 1700015F17 gene                                            | 0.89                    | 3.59               | 1.05            | 7.10  | 0.000253  | 0.74            | 4.98  | 3.35E-03  |
| 1438211_s_at | Dbp           | D site albumin promoter binding protein                               | 0.89                    | 12.17              | 0.83            | 4.91  | 4.83E-03  | 0.94            | 5.58  | 1.40E-03  |
| 1432170_at   | Tsfn          | Ts translation elongation factor, mitochondrial                       | 0.88                    | 3.59               | 0.79            | 7.93  | 0.000102  | 0.98            | 9.83  | 8.08E-06  |
| 1440054_at   | Pik3ca        | phosphatidylinositol 3-kinase, catalytic, alpha polypeptide           | 0.87                    | 5.53               | 0.82            | 5.07  | 0.003849  | 0.93            | 5.74  | 0.001109  |
| 1432672_at   | 4933407A17Rik | RIKEN cDNA 4933407A17 gene                                            | 0.86                    | 3.69               | 1.20            | 9.98  | 1.42E-05  | 0.53            | 4.43  | 7.56E-03  |
| 1446473_at   | 4732418C07Rik | RIKEN cDNA 4732418C07 gene                                            | 0.86                    | 2.73               | 0.93            | 7.49  | 0.000165  | 0.80            | 6.45  | 0.000412  |
| 1439207_at   | Pnma5         | paraneoplastic antigen family 5                                       | 0.86                    | 3.48               | 0.75            | 5.31  | 0.002808  | 0.97            | 6.85  | 0.000239  |
| 1460490_at   | Mrp15         | mitochondrial ribosomal protein L15                                   | 0.82                    | 2.72               | 0.83            | 4.45  | 0.009554  | 0.81            | 4.32  | 8.86E-03  |
| 1444596_at   | Pax7          | paired box gene 7                                                     | 0.70                    | 3.23               | 0.74            | 4.92  | 4.78E-03  | 0.66            | 4.43  | 7.56E-03  |
| 1439193_at   | Prrx1         | paired related homeobox protein-like 1                                | 0.69                    | 3.87               | 0.81            | 6.54  | 5.39E-04  | 0.57            | 4.61  | 5.72E-03  |
| 1429905_at   | Lhx9          | LIM homeobox protein 9                                                | 0.69                    | 2.37               | 0.80            | 6.19  | 0.000885  | 0.57            | 4.35  | 8.44E-03  |
| 1457640_x_at | Pigs          | phosphatidylinositol glycan anchor biosynthesis, class S              | 0.68                    | 3.76               | 0.62            | 5.19  | 3.27E-03  | 0.73            | 6.11  | 6.54E-04  |
| 1434588_x_at | Gm6142        | tubulin cofactor a pseudogene                                         | 0.68                    | 4.65               | 0.59            | 6.04  | 1.07E-03  | 0.77            | 7.89  | 6.62E-05  |
| 1423854_a_at | Ras11b        | RAS-like, family 11, member B                                         | 0.67                    | 10.08              | 0.68            | 5.23  | 3.09E-03  | 0.66            | 5.04  | 3.07E-03  |
| 1427327_at   | Pilra         | paired immunoglobulin-like type 2 receptor alpha                      | 0.65                    | 3.26               | 0.73            | 5.87  | 0.001344  | 0.57            | 4.55  | 0.006283  |
| 1448470_at   | Fbp1          | fructose bisphosphatase 1                                             | 0.65                    | 2.58               | 0.67            | 4.64  | 7.24E-03  | 0.63            | 4.34  | 8.68E-03  |
| 1460115_at   | Unknown       | Unknown                                                               | 0.64                    | 5.33               | 0.81            | 7.36  | 1.92E-04  | 0.48            | 4.39  | 7.94E-03  |
| 1424233_at   | Meox2         | mesenchyme homeobox 2                                                 | 0.62                    | 2.72               | 0.55            | 6.18  | 0.000897  | 0.69            | 7.83  | 7.08E-05  |
| 1450810_at   | Fshr          | follicle stimulating hormone receptor                                 | 0.62                    | 3.76               | 0.60            | 5.00  | 0.004286  | 0.63            | 5.23  | 0.00233   |
| 1450496_a_at | Ska1          | spindle and kinetochore associated complex subunit 1                  | 0.60                    | 2.48               | 0.60            | 4.44  | 0.009691  | 0.60            | 4.47  | 7.09E-03  |
| 1419626_at   | Adam25        | a disintegrin and metallopeptidase domain 25 (testase 2)              | 0.57                    | 2.12               | 0.55            | 4.49  | 0.008988  | 0.59            | 4.78  | 0.004496  |

|              |               |                                                              |
|--------------|---------------|--------------------------------------------------------------|
| 1442361_at   | Park2         | Parkinson disease (autosomal recessive, juvenile) 2, parkin  |
| 1415779_s_at | Actg1         | actin, gamma, cytoplasmic 1                                  |
| 1446617_at   | St8sia4       | ST8 alpha-N-acetyl-neuraminide alpha-2,8-sialyltransferase 4 |
| 1448012_at   | 3110053B16Rik | RIKEN cDNA 3110053B16 gene                                   |

|      |       |      |      |          |      |      |          |
|------|-------|------|------|----------|------|------|----------|
| 0.57 | 3.15  | 0.64 | 6.44 | 6.26E-04 | 0.49 | 4.94 | 0.003527 |
| 0.45 | 12.56 | 0.38 | 4.65 | 0.007229 | 0.52 | 6.28 | 5.21E-04 |
| 0.44 | 2.56  | 0.40 | 4.77 | 0.005991 | 0.48 | 5.72 | 1.13E-03 |
| 0.44 | 2.98  | 0.49 | 5.47 | 2.18E-03 | 0.39 | 4.31 | 9.06E-03 |
