# Supplementary material for: Effects of sleep and wake on astrocytes: clues from molecular and ultrastructural studies
Source: PubMed Central journal article supplement (PMC4548305; doi:10.1186/s12915-015-0176-7), 2015-08-25
Supplement: 12915_2015_176_MOESM4_ESM.pdf [file 12915_2015_176_MOESM4_ESM.pdf]

Table 4. Astrocyte genes upregulated in W + SD vs S (fold change>30%, p<0.01)

| Probeset ID  | Gene Name     | Gene Title                                                               | W + SD vs S.            |                    | W vs. S         |        |           | SD vs. S        |        |           |
|--------------|---------------|--------------------------------------------------------------------------|-------------------------|--------------------|-----------------|--------|-----------|-----------------|--------|-----------|
|              |               |                                                                          | Average Log Fold Change | Average Expression | Log Fold Change | t      | adj.P.Val | Log Fold Change | t      | adj.P.Val |
| 1427683_at   | Egr2          | early growth response 2                                                  | -3.02                   | 6.46               | -2.65           | -4.83  | 0.005435  | -3.39           | -6.19  | 0.000587  |
| 1418687_at   | Arc           | activity regulated cytoskeletal-associated protein                       | -2.52                   | 7.70               | -2.32           | -6.73  | 0.000412  | -2.72           | -7.90  | 6.6E-05   |
| 1435663_at   | Esr1          | estrogen receptor 1 (alpha)                                              | -2.30                   | 4.04               | -1.64           | -6.61  | 0.000492  | -2.96           | -11.93 | 1.54E-06  |
| 1458582_at   | Lin54         | lin-54 homolog (C. elegans)                                              | -2.14                   | 5.44               | -1.74           | -5.20  | 0.003223  | -2.54           | -7.56  | 1.00E-04  |
| 1416505_at   | Nr4a1         | nuclear receptor subfamily 4, group A, member 1                          | -2.07                   | 7.86               | -1.86           | -6.76  | 3.98E-04  | -2.28           | -8.29  | 3.99E-05  |
| 1445394_at   | Unknown       | Unknown                                                                  | -1.97                   | 6.04               | -1.87           | -5.07  | 0.003866  | -2.07           | -5.60  | 1.36E-03  |
| 1418936_at   | Maff          | v-maf musculoaponeurotic fibrosarcoma oncogene family, protein F (avian) | -1.94                   | 7.15               | -1.53           | -6.53  | 0.000539  | -2.36           | -10.04 | 7.15E-06  |
| 1458361_at   | Dclre1c       | DNA cross-link repair 1C, PSO2 homolog (S. cerevisiae)                   | -1.75                   | 4.13               | -1.46           | -5.49  | 2.15E-03  | -2.05           | -7.74  | 7.77E-05  |
| 1445669_at   | Spry4         | sprouty homolog 4 (Drosophila)                                           | -1.74                   | 6.33               | -1.59           | -6.22  | 0.000846  | -1.88           | -7.34  | 0.000132  |
| 1438805_at   | Ccnd3         | cyclin D3                                                                | -1.68                   | 5.77               | -1.85           | -8.64  | 5.06E-05  | -1.52           | -7.10  | 1.75E-04  |
| 1443475_at   | Hist1h3i      | histone cluster 1, H3i                                                   | -1.67                   | 4.86               | -1.79           | -6.83  | 0.000364  | -1.56           | -5.94  | 8.17E-04  |
| 1417394_at   | Klf4          | Kruppel-like factor 4 (gut)                                              | -1.66                   | 5.47               | -1.52           | -4.91  | 0.004809  | -1.80           | -5.79  | 1.02E-03  |
| 1439261_x_at | Mitd1         | MIT, microtubule interacting and transport, domain containing 1          | -1.61                   | 3.88               | -2.00           | -10.82 | 8.67E-06  | -1.22           | -6.60  | 3.33E-04  |
| 1459979_x_at | Zfp68         | zinc finger protein 68                                                   | -1.58                   | 5.04               | -1.36           | -4.98  | 0.004406  | -1.81           | -6.60  | 3.34E-04  |
| 1445456_at   | Kcmf1         | potassium channel modulatory factor 1                                    | -1.58                   | 4.12               | -1.57           | -15.26 | 3.56E-07  | -1.59           | -15.47 | 2.5E-07   |
| 1423509_a_at | lapp          | islet amyloid polypeptide                                                | -1.57                   | 4.36               | -1.26           | -7.62  | 1.47E-04  | -1.89           | -11.46 | 2.23E-06  |
| 1445339_at   | Cnga4         | cyclic nucleotide gated channel alpha 4                                  | -1.56                   | 3.94               | -1.79           | -6.86  | 0.000355  | -1.33           | -5.09  | 2.84E-03  |
| 1435560_at   | Itgal         | integrin alpha L                                                         | -1.55                   | 3.85               | -2.10           | -12.95 | 2.65E-06  | -1.00           | -6.16  | 6.12E-04  |
| 1455721_at   | Gsp12         | G1 to S phase transition 2                                               | -1.54                   | 3.87               | -1.69           | -7.66  | 0.000139  | -1.39           | -6.30  | 5.02E-04  |
| 1417001_a_at | D4Wsu53e      | DNA segment, Chr 4, Wayne State University 53, expressed                 | -1.53                   | 8.46               | -1.33           | -7.67  | 0.000137  | -1.73           | -10.01 | 7.27E-06  |
| 1419766_at   | Sik1          | salt inducible kinase 1                                                  | -1.52                   | 7.88               | -1.11           | -7.32  | 1.98E-04  | -1.92           | -12.66 | 1.15E-06  |
| 1422001_at   | Inhbc         | inhibin beta-C                                                           | -1.49                   | 3.60               | -1.44           | -10.92 | 8.67E-06  | -1.54           | -11.68 | 1.74E-06  |
| 1460212_at   | Gnat1         | guanine nucleotide binding protein, alpha transducing 1                  | -1.49                   | 4.34               | -1.35           | -8.16  | 8.09E-05  | -1.63           | -9.85  | 8.08E-06  |
| 1427345_a_at | Sult1a1       | sulfotransferase family 1A, phenol-preferring, member 1                  | -1.47                   | 9.56               | -1.18           | -4.60  | 7.82E-03  | -1.76           | -6.84  | 2.40E-04  |
| 1430314_at   | RIKEN...      | RIKEN cDNA 4933437F05 gene                                               | -1.45                   | 3.73               | -1.35           | -5.54  | 0.002015  | -1.55           | -6.34  | 4.77E-04  |
| 1427126_at   | Hspa1b        | heat shock protein 1B                                                    | -1.44                   | 3.26               | -1.59           | -7.33  | 0.000198  | -1.30           | -5.98  | 7.76E-04  |
| 1423753_at   | Bambi         | BMP and activin membrane-bound inhibitor, homolog (Xenopus laevis)       | -1.43                   | 6.88               | -1.28           | -4.59  | 0.007875  | -1.58           | -5.66  | 1.24E-03  |
| 1421080_at   | Nr4a3         | nuclear receptor subfamily 4, group A, member 3                          | -1.42                   | 8.25               | -1.11           | -4.91  | 0.004809  | -1.72           | -7.64  | 9.00E-05  |
| 1423026_at   | Rad51c        | RAD51 homolog c (S. cerevisiae)                                          | -1.41                   | 4.64               | -1.49           | -5.09  | 3.75E-03  | -1.33           | -4.55  | 0.006264  |
| 1432840_at   | Galnt11       | polypeptide N-acetylgalactosaminyltransferase 11                         | -1.40                   | 5.43               | -1.57           | -6.06  | 0.001036  | -1.24           | -4.77  | 0.004563  |
| 1439647_at   | Gm13298       | predicted gene 13298                                                     | -1.39                   | 5.52               | -1.56           | -8.64  | 5.06E-05  | -1.21           | -6.69  | 2.88E-04  |
| 1426063_a_at | Gem           | GTP binding protein (gene overexpressed in skeletal muscle)              | -1.38                   | 8.36               | -1.22           | -5.46  | 2.25E-03  | -1.55           | -6.95  | 2.10E-04  |
| 1429221_at   | Wdr85         | WD repeat domain 85                                                      | -1.38                   | 5.56               | -1.44           | -7.98  | 9.76E-05  | -1.32           | -7.31  | 1.36E-04  |
| 1455398_at   | Lrrc8c        | leucine rich repeat containing 8 family, member C                        | -1.38                   | 7.45               | -1.14           | -6.24  | 0.000828  | -1.62           | -8.85  | 2.18E-05  |
| 1458387_at   | Ptdss2        | phosphatidylserine synthase 2                                            | -1.36                   | 6.40               | -1.08           | -5.06  | 0.003893  | -1.65           | -7.72  | 7.86E-05  |
| 1442428_at   | Unknown       | Unknown                                                                  | -1.35                   | 4.66               | -1.33           | -4.75  | 0.006223  | -1.37           | -4.88  | 0.003837  |
| 1417924_at   | Pak3          | p21 protein (Cdc42/Rac)-activated kinase 3                               | -1.35                   | 4.61               | -1.11           | -5.17  | 3.38E-03  | -1.59           | -7.41  | 0.000123  |
| 1455472_at   | A630071D13Rik | RIKEN cDNA A630071D13 gene                                               | -1.35                   | 4.36               | -1.35           | -4.57  | 0.008081  | -1.35           | -4.56  | 6.15E-03  |
| 1445343_at   | Tmed5         | transmembrane emp24 protein transport domain containing 5                | -1.34                   | 3.87               | -0.90           | -5.68  | 0.00169   | -1.78           | -11.24 | 2.54E-06  |
| 1446844_at   | Chchd7        | coiled-coil-helix-coiled-coil-helix domain containing 7                  | -1.33                   | 3.56               | -1.01           | -4.91  | 4.81E-03  | -1.66           | -8.10  | 5.11E-05  |
| 1434741_at   | Rreb1         | ras responsive element binding protein 1                                 | -1.32                   | 3.88               | -1.01           | -9.27  | 2.86E-05  | -1.64           | -14.96 | 2.50E-07  |
| 1418322_at   | Crem          | cAMP responsive element modulator                                        | -1.32                   | 7.14               | -0.86           | -4.87  | 0.00513   | -1.78           | -10.15 | 6.82E-06  |
| 1428223_at   | Mfsd2a        | major facilitator superfamily domain containing 2A                       | -1.32                   | 9.98               | -1.29           | -4.86  | 0.005137  | -1.34           | -5.06  | 0.00297   |
| 1429437_at   | Prpf40a       | PRP40 pre-mRNA processing factor 40 homolog A (yeast)                    | -1.31                   | 3.88               | -1.34           | -5.79  | 0.001488  | -1.29           | -5.57  | 0.001416  |
| 1416811_s_at | Ctla2a        | cytotoxic T lymphocyte-associated protein 2 alpha                        | -1.31                   | 4.33               | -1.21           | -5.49  | 2.16E-03  | -1.41           | -6.37  | 4.65E-04  |
| 1426429_at   | Thap7         | THAP domain containing 7                                                 | -1.30                   | 7.01               | -1.21           | -4.47  | 0.009253  | -1.39           | -5.15  | 2.61E-03  |
| 1457894_at   | Mett11b       | Methyltransferase like 11B                                               | -1.28                   | 7.34               | -1.17           | -4.43  | 0.009812  | -1.39           | -5.23  | 2.32E-03  |
| 1429319_at   | Rhoh          | ras homolog gene family, member H                                        | -1.27                   | 4.66               | -1.22           | -7.47  | 1.66E-04  | -1.32           | -8.09  | 5.20E-05  |
| 1456771_at   | Zer1          | zer-1 homolog (C. elegans)                                               | -1.27                   | 3.22               | -1.09           | -7.55  | 0.000154  | -1.45           | -10.10 | 6.86E-06  |
| 1444675_at   | AL023051      | expressed sequence AL023051                                              | -1.27                   | 3.93               | -1.10           | -6.23  | 0.000837  | -1.44           | -8.20  | 4.59E-05  |
| 1440959_s_at | Mynn          | myoneurin                                                                | -1.26                   | 5.69               | -1.08           | -4.73  | 0.00631   | -1.44           | -6.30  | 0.000506  |
| 1427652_x_at | Synj2         | synaptojanin 2                                                           | -1.26                   | 8.07               | -1.11           | -4.80  | 0.005671  | -1.41           | -6.13  | 6.33E-04  |
| 1444705_at   | App           | amyloid beta (A4) precursor protein                                      | -1.25                   | 3.53               | -1.28           | -10.38 | 9.17E-06  | -1.22           | -9.91  | 7.81E-06  |
| 1434618_at   | Crebzf        | CREB/ATF bZIP transcription factor                                       | -1.23                   | 6.04               | -1.23           | -4.98  | 0.004432  | -1.23           | -4.98  | 3.36E-03  |

|              |               |                                                                                   |
|--------------|---------------|-----------------------------------------------------------------------------------|
| 1449760_at   | Ddost         | dolichyl-di-phosphooligosaccharide-protein glycotransferase                       |
| 1432866_at   | 6030442K20Rik | RIKEN cDNA 6030442K20 gene                                                        |
| 1448471_a_at | Ctla2a        | cytotoxic T lymphocyte-associated protein 2 alpha                                 |
| 1450288_at   | Cdh6          | cadherin 6                                                                        |
| 1456696_x_at | Rmi1          | RMI1, RecQ mediated genome instability 1, homolog (S. cerevisiae)                 |
| 1423100_at   | Fos           | FBJ osteosarcoma oncogene                                                         |
| 1443168_at   | Unknown       | Unknown                                                                           |
| 1433106_at   | 5830438M01Rik | RIKEN cDNA 5830438M01 gene                                                        |
| 1448594_at   | Wisp1         | WNT1 inducible signaling pathway protein 1                                        |
| 1431844_at   | Kcnmb2        | potassium large conductance calcium-activated channel, subfamily M, beta member 2 |
| 1437882_s_at | 3110048L19Rik | zinc finger pseudogene                                                            |
| 1458034_at   | RIKEN...      | RIKEN cDNA 1200016B10 gene                                                        |
| 1431651_at   | Ccdc151       | coiled-coil domain containing 151                                                 |
| 1433099_at   | 4933428L12Rik | RIKEN cDNA 4933428L12 gene                                                        |
| 1427306_at   | Ryr1          | ryanodine receptor 1, skeletal muscle                                             |
| 1444462_at   | Unknown       | Unknown                                                                           |
| 1447534_at   | Unknown       | Unknown                                                                           |
| 1458734_at   | C78128        | Expressed sequence C78128                                                         |
| 1427127_x_at | Hspa1b        | heat shock protein 1B                                                             |
| 1450749_a_at | Nr4a2         | nuclear receptor subfamily 4, group A, member 2                                   |
| 1446257_at   | Hs6st2        | heparan sulfate 6-O-sulfotransferase 2                                            |
| 1418220_at   | Foxf2         | forkhead box F2                                                                   |
| 1430298_at   | 4930473A06Rik | RIKEN cDNA 4930473A06 gene                                                        |
| 1440716_at   | 6430604M11Rik | RIKEN cDNA 6430604M11 gene                                                        |
| 1442855_at   | Dopey1        | dopey family member 1                                                             |
| 1418099_at   | Tnfrsf1b      | tumor necrosis factor receptor superfamily, member 1b                             |
| 1430819_at   | Naaa          | N-acylethanolamine acid amidase                                                   |
| 1435998_at   | Ccnb1ip1      | cyclin B1 interacting protein 1                                                   |
| 1454428_at   | 4930467D19Rik | RIKEN cDNA 4930467D19 gene                                                        |
| 1443405_at   | Unknown       | Unknown                                                                           |
| 1450807_at   | Ltb4r2        | leukotriene B4 receptor 2                                                         |
| 1427513_at   | BC024137      | cDNA sequence BC024137                                                            |
| 1450822_at   | Lyz1          | lysozyme 1                                                                        |
| 1429777_at   | Dnajb6        | DnaJ (Hsp40) homolog, subfamily B, member 6                                       |
| 1456846_at   | Zbtb42        | zinc finger and BTB domain containing 42                                          |
| 1422122_at   | Fcgr2a        | Fc receptor, IgE, low affinity II, alpha polypeptide                              |
| 1447804_x_at | BC031781      | CDNA sequence BC031781                                                            |
| 1443008_at   | Msi2          | Musashi homolog 2 (Drosophila)                                                    |
| 1417214_at   | Rab27b        | RAB27b, member RAS oncogene family                                                |
| 1457956_at   | Camta1        | calmodulin binding transcription activator 1                                      |
| 1431906_at   | 2700068H02Rik | RIKEN cDNA 2700068H02 gene                                                        |
| 1433047_at   | 5330430B06Rik | RIKEN cDNA 5330430B06 gene                                                        |
| 1427836_at   | 0610007P08Rik | RIKEN cDNA 0610007P08 gene                                                        |
| 1456070_at   | Ptprg         | protein tyrosine phosphatase, receptor type, G                                    |
| 1444318_at   | Chchd7        | Coiled-coil-helix-coiled-coil-helix domain containing 7                           |
| 1438099_at   | Trio          | triple functional domain (PTPRF interacting)                                      |
| 1441742_at   | Kcnh5         | potassium voltage-gated channel, subfamily H (eag-related), member 5              |
| 1427506_at   | Ppil5         | peptidylprolyl isomerase (cyclophilin) like 5                                     |
| 1439613_at   | Adcy10        | adenylate cyclase 10                                                              |
| 1427880_at   | Uqcrcq        | ubiquinol-cytochrome c reductase, complex III subunit VII                         |
| 1457339_at   | Ccm2          | cerebral cavernous malformation 2 homolog (human)                                 |
| 1457842_at   | Zfp292        | zinc finger protein 292                                                           |
| 1445734_at   | Tdh           | L-threonine dehydrogenase; predicted gene 13929                                   |
| 1443286_at   | AU019754      | expressed sequence AU019754                                                       |
| 1436090_at   | Enpp6         | ectonucleotide pyrophosphatase/phosphodiesterase 6                                |
| 1460275_at   | Gpr3          | G-protein coupled receptor 3                                                      |
| 1433352_at   | C430049A07Rik | RIKEN cDNA C430049A07 gene                                                        |
| 1449015_at   | Retnla        | resistin like alpha                                                               |
| 1432623_at   | Supv3l1       | suppressor of var1, 3-like 1 (S. cerevisiae)                                      |
| 1433404_at   | 4930423O20Rik | RIKEN cDNA 4930423O20 gene                                                        |
| 1447728_x_at | Hspa9         | heat shock protein 9                                                              |
| 1429060_at   | Malat1        | metastasis associated lung adenocarcinoma transcript 1 (non-coding RNA)           |
| 1454384_at   | 2900057C01Rik | RIKEN cDNA 2900057C01 gene                                                        |

|       |      |       |        |          |       |        |          |
|-------|------|-------|--------|----------|-------|--------|----------|
| -1.22 | 5.03 | -1.25 | -10.93 | 8.67E-06 | -1.20 | -10.43 | 5.63E-06 |
| -1.22 | 3.59 | -1.24 | -5.61  | 1.83E-03 | -1.20 | -5.44  | 1.69E-03 |
| -1.22 | 3.30 | -1.17 | -6.68  | 0.00045  | -1.26 | -7.18  | 0.000159 |
| -1.21 | 5.60 | -1.04 | -5.14  | 0.003534 | -1.37 | -6.74  | 0.000273 |
| -1.19 | 3.68 | -0.95 | -8.84  | 4.25E-05 | -1.43 | -13.38 | 6.22E-07 |
| -1.19 | 8.08 | -1.18 | -4.53  | 0.008441 | -1.20 | -4.60  | 5.82E-03 |
| -1.18 | 3.97 | -1.22 | -5.03  | 4.11E-03 | -1.13 | -4.64  | 5.57E-03 |
| -1.17 | 4.42 | -1.09 | -6.02  | 0.001106 | -1.25 | -6.90  | 2.25E-04 |
| -1.17 | 4.13 | -0.96 | -5.13  | 0.00355  | -1.39 | -7.44  | 1.18E-04 |
| -1.17 | 3.26 | -1.29 | -8.54  | 5.44E-05 | -1.04 | -6.84  | 0.00024  |
| -1.16 | 4.07 | -1.42 | -7.43  | 0.000172 | -0.89 | -4.69  | 0.005171 |
| -1.15 | 3.79 | -1.27 | -12.54 | 2.99E-06 | -1.04 | -10.31 | 6.39E-06 |
| -1.15 | 5.01 | -1.30 | -7.98  | 9.76E-05 | -1.00 | -6.15  | 6.22E-04 |
| -1.15 | 3.38 | -1.39 | -9.64  | 2.14E-05 | -0.91 | -6.31  | 4.96E-04 |
| -1.15 | 4.37 | -1.22 | -5.65  | 1.73E-03 | -1.07 | -4.96  | 3.44E-03 |
| -1.15 | 3.72 | -1.01 | -7.32  | 0.000198 | -1.28 | -9.30  | 1.42E-05 |
| -1.14 | 3.34 | -1.14 | -7.17  | 0.000231 | -1.14 | -7.13  | 0.000168 |
| -1.14 | 3.16 | -1.19 | -8.61  | 5.10E-05 | -1.08 | -7.80  | 7.38E-05 |
| -1.13 | 3.93 | -1.13 | -4.90  | 0.004891 | -1.13 | -4.87  | 3.92E-03 |
| -1.13 | 7.59 | -0.97 | -5.15  | 0.003453 | -1.29 | -6.90  | 2.25E-04 |
| -1.13 | 4.21 | -1.07 | -4.59  | 0.007865 | -1.18 | -5.08  | 2.87E-03 |
| -1.13 | 4.27 | -1.31 | -7.36  | 0.000191 | -0.95 | -5.33  | 1.99E-03 |
| -1.11 | 3.52 | -1.01 | -7.60  | 1.47E-04 | -1.22 | -9.23  | 1.45E-05 |
| -1.11 | 5.68 | -1.17 | -4.79  | 0.005785 | -1.05 | -4.33  | 0.008841 |
| -1.11 | 4.12 | -0.79 | -6.88  | 0.000343 | -1.43 | -12.52 | 1.15E-06 |
| -1.11 | 4.05 | -0.96 | -5.66  | 1.72E-03 | -1.25 | -7.33  | 1.33E-04 |
| -1.10 | 3.50 | -1.00 | -5.06  | 0.003945 | -1.21 | -6.08  | 6.94E-04 |
| -1.10 | 3.42 | -0.99 | -4.46  | 0.009339 | -1.21 | -5.46  | 1.64E-03 |
| -1.10 | 3.58 | -1.06 | -6.56  | 0.00052  | -1.14 | -7.03  | 1.92E-04 |
| -1.10 | 5.38 | -1.26 | -9.28  | 2.86E-05 | -0.95 | -7.00  | 1.99E-04 |
| -1.10 | 4.33 | -0.77 | -6.30  | 7.61E-04 | -1.43 | -11.69 | 1.74E-06 |
| -1.10 | 6.63 | -0.81 | -5.02  | 0.004144 | -1.39 | -8.64  | 2.64E-05 |
| -1.10 | 3.49 | -1.13 | -6.42  | 0.000647 | -1.06 | -6.04  | 7.26E-04 |
| -1.09 | 4.73 | -1.16 | -8.71  | 4.70E-05 | -1.02 | -7.60  | 9.46E-05 |
| -1.09 | 5.62 | -1.22 | -5.80  | 0.00146  | -0.95 | -4.54  | 6.32E-03 |
| -1.08 | 4.27 | -1.11 | -9.27  | 2.86E-05 | -1.05 | -8.75  | 2.30E-05 |
| -1.07 | 3.30 | -1.03 | -7.54  | 0.000156 | -1.12 | -8.15  | 4.82E-05 |
| -1.07 | 4.09 | -1.00 | -7.52  | 0.000158 | -1.13 | -8.48  | 3.14E-05 |
| -1.07 | 7.62 | -0.95 | -6.67  | 4.53E-04 | -1.18 | -8.24  | 4.27E-05 |
| -1.07 | 3.67 | -1.30 | -9.55  | 2.32E-05 | -0.83 | -6.06  | 7.09E-04 |
| -1.06 | 3.97 | -1.09 | -5.91  | 0.001279 | -1.02 | -5.53  | 1.50E-03 |
| -1.05 | 3.57 | -1.03 | -10.74 | 8.67E-06 | -1.08 | -11.29 | 2.54E-06 |
| -1.05 | 6.28 | -0.98 | -5.66  | 0.001724 | -1.13 | -6.55  | 3.58E-04 |
| -1.05 | 6.82 | -0.99 | -5.28  | 0.002907 | -1.10 | -5.86  | 9.27E-04 |
| -1.05 | 5.90 | -1.14 | -7.79  | 0.000119 | -0.96 | -6.52  | 0.000372 |
| -1.05 | 8.69 | -1.03 | -6.07  | 0.00102  | -1.06 | -6.24  | 0.000547 |
| -1.04 | 3.75 | -1.18 | -5.92  | 1.26E-03 | -0.90 | -4.51  | 6.65E-03 |
| -1.03 | 5.38 | -0.97 | -8.09  | 8.64E-05 | -1.09 | -9.12  | 1.62E-05 |
| -1.03 | 3.95 | -0.90 | -8.53  | 5.44E-05 | -1.17 | -11.06 | 2.76E-06 |
| -1.03 | 4.21 | -1.11 | -5.42  | 2.36E-03 | -0.96 | -4.69  | 5.12E-03 |
| -1.02 | 4.33 | -1.16 | -8.77  | 4.33E-05 | -0.88 | -6.69  | 2.88E-04 |
| -1.01 | 3.94 | -0.89 | -8.13  | 8.26E-05 | -1.12 | -10.25 | 6.58E-06 |
| -1.01 | 4.11 | -0.83 | -5.09  | 0.003754 | -1.18 | -7.23  | 0.00015  |
| -1.00 | 4.67 | -0.99 | -9.28  | 2.86E-05 | -1.02 | -9.50  | 1.16E-05 |
| -1.00 | 5.04 | -0.96 | -5.66  | 1.73E-03 | -1.04 | -6.10  | 6.68E-04 |
| -1.00 | 6.67 | -0.92 | -5.53  | 0.002027 | -1.08 | -6.51  | 3.77E-04 |
| -0.99 | 4.24 | -1.06 | -8.21  | 7.69E-05 | -0.93 | -7.18  | 1.59E-04 |
| -0.99 | 3.96 | -1.25 | -10.45 | 8.96E-06 | -0.73 | -6.12  | 6.48E-04 |
| -0.98 | 5.52 | -1.10 | -6.42  | 0.000646 | -0.87 | -5.04  | 0.003073 |
| -0.98 | 4.29 | -1.07 | -8.85  | 4.25E-05 | -0.90 | -7.42  | 0.000122 |
| -0.98 | 3.84 | -1.00 | -8.81  | 4.25E-05 | -0.95 | -8.35  | 3.67E-05 |
| -0.98 | 8.98 | -1.04 | -5.21  | 0.003177 | -0.91 | -4.55  | 6.26E-03 |
| -0.98 | 3.60 | -0.88 | -8.40  | 6.23E-05 | -1.07 | -10.29 | 6.39E-06 |

|              |               |                                                                                       |
|--------------|---------------|---------------------------------------------------------------------------------------|
| 1421044_at   | Mrc2          | mannose receptor, C type 2                                                            |
| 1438901_at   | BC024814      | cDNA sequence BC024814                                                                |
| 1459337_at   | Alg6          | asparagine-linked glycosylation 6 homolog (yeast, alpha-1,3,-glucosyltransferase)     |
| 1424589_s_at | Rnpc3         | RNA-binding region (RNP1, RRM) containing 3                                           |
| 1420991_at   | Ankrd1        | ankyrin repeat domain 1 (cardiac muscle)                                              |
| 1440748_at   | Scarf1        | scavenger receptor class F, member 1                                                  |
| 1419881_x_at | Unknown       | Unknown                                                                               |
| 1442705_at   | C76938        | expressed sequence C76938                                                             |
| 1437326_x_at | Cela3b        | chymotrypsin-like elastase family, member 3B                                          |
| 1420964_at   | Enc1          | ectodermal-neural cortex 1                                                            |
| 1430345_at   | 5530402H23Rik | RIKEN cDNA 5530402H23 gene                                                            |
| 1457984_at   | Crh           | corticotropin releasing hormone                                                       |
| 1443525_at   | Dbx2          | developing brain homeobox 2                                                           |
| 1447010_at   | Zfp609        | zinc finger protein 609                                                               |
| 1442014_at   | Unknown       | Unknown                                                                               |
| 1417431_a_at | Sphk2         | sphingosine kinase 2                                                                  |
| 1440577_at   | Mkln1         | muskelin 1, intracellular mediator containing kelch motifs                            |
| 1440276_at   | Rfp14b        | ret finger protein-like 4B                                                            |
| 1446684_at   | Ralgapa1      | Ral GTPase activating protein, alpha subunit 1                                        |
| 1416814_at   | Tia1          | cytotoxic granule-associated RNA binding protein 1                                    |
| 1424761_at   | Fam115c       | family with sequence similarity 115, member C                                         |
| 1440111_at   | Unknown       | Unknown                                                                               |
| 1422818_at   | Nedd9         | neural precursor cell expressed, developmentally down-regulated gene 9                |
| 1432110_at   | 4930402F06Rik | RIKEN cDNA 4930402F06 gene                                                            |
| 1458509_at   | Ankrd49       | ankyrin repeat domain 49                                                              |
| 1449568_at   | Klb           | klotho beta                                                                           |
| 1419808_at   | Cog4          | component of oligomeric golgi complex 4                                               |
| 1447835_at   | Fam125b       | family with sequence similarity 125, member B                                         |
| 1420527_s_at | Tcp10a        | t-complex protein 10a                                                                 |
| 1419410_at   | Batf          | basic leucine zipper transcription factor, ATF-like                                   |
| 1448078_at   | C76533        | expressed sequence C76533                                                             |
| 1419024_at   | Ptp4a1        | protein tyrosine phosphatase 4a1                                                      |
| 1418614_at   | Kcnj1         | potassium inwardly-rectifying channel, subfamily J, member 1                          |
| 1436965_at   | Emilin3       | elastin microfibril interlacer 3                                                      |
| 1418221_at   | Csn1s2b       | casein alpha s2-like B                                                                |
| 1443202_at   | Cyb5b         | similar to cytochrome b5 outer mitochondrial membrane precursor; cytochrome b5 type B |
| 1458189_at   | Emid2         | EMI domain containing 2                                                               |
| 1419863_at   | Tsdt2         | cDNA sequence BC057893                                                                |
| 1441439_at   | Ucn3          | urocortin 3                                                                           |
| 1415810_at   | Uhrf1         | ubiquitin-like, containing PHD and RING finger domains, 1                             |
| 1438542_at   | Trp53         | Transformation related protein 53                                                     |
| 1431718_at   | Kif15         | kinesin family member 15                                                              |
| 1422296_at   | Sike1         | suppressor of IKBKE 1                                                                 |
| 1429911_at   | Mcph1         | microcephaly, primary autosomal recessive 1                                           |
| 1431280_at   | A1597468      | expressed sequence A1597468                                                           |
| 1447188_at   | Unknown       | Unknown                                                                               |
| 1439930_at   | Smarca2       | SWI/SNF related, matrix associated, actin dependent regulator of chromatin            |
| 1422940_x_at | Serpinc3b     | serine (or cysteine) peptidase inhibitor, clade B (ovalbumin), member 3B              |
| 1444507_at   | Usp53         | ubiquitin specific peptidase 53                                                       |
| 1456016_x_at | BC005624      | cDNA sequence BC005624                                                                |
| 1459823_at   | Ehd2          | EH-domain containing 2                                                                |
| 1444282_at   | Samd10        | Sterile alpha motif domain containing 10                                              |
| 1421532_at   | Rxfp2         | relaxin/insulin-like family peptide receptor 2                                        |
| 1442492_at   | DXErt11e      | DNA segment, Chr X, ERATO Doi 11, expressed                                           |
| 1438308_at   | Agbl4         | ATP/GTP binding protein-like 4                                                        |
| 1448830_at   | Dusp1         | dual specificity phosphatase 1                                                        |
| 1457111_at   | AA415038      | expressed sequence AA415038                                                           |
| 1454287_at   | 4931428A05Rik | RIKEN cDNA 4931428A05 gene                                                            |
| 1420004_s_at | Pom121        | nuclear pore membrane protein 121                                                     |
| 1450645_at   | Mt4           | metallothionein 4                                                                     |
| 1430679_at   | 4933404O12Rik | RIKEN cDNA 4933404O12 gene                                                            |
| 1458409_at   | C86595        | expressed sequence C86595                                                             |
| 1420503_at   | Slc6a14       | solute carrier family 6 (neurotransmitter transporter), member 14                     |

|       |       |       |        |          |       |        |          |
|-------|-------|-------|--------|----------|-------|--------|----------|
| -0.98 | 4.94  | -1.08 | -5.57  | 0.001934 | -0.87 | -4.45  | 7.32E-03 |
| -0.97 | 6.31  | -0.88 | -6.09  | 0.001003 | -1.06 | -7.36  | 1.29E-04 |
| -0.97 | 3.56  | -1.11 | -10.98 | 8.67E-06 | -0.82 | -8.11  | 5.11E-05 |
| -0.97 | 6.48  | -0.82 | -4.44  | 0.009648 | -1.11 | -6.00  | 0.000762 |
| -0.96 | 3.67  | -1.36 | -12.30 | 3.05E-06 | -0.57 | -5.10  | 2.80E-03 |
| -0.96 | 4.88  | -0.93 | -8.10  | 8.62E-05 | -1.00 | -8.69  | 2.48E-05 |
| -0.96 | 3.59  | -0.98 | -5.12  | 0.003609 | -0.94 | -4.88  | 3.87E-03 |
| -0.96 | 4.49  | -0.90 | -7.78  | 1.19E-04 | -1.02 | -8.81  | 2.23E-05 |
| -0.95 | 3.86  | -1.30 | -11.87 | 4.34E-06 | -0.61 | -5.53  | 1.50E-03 |
| -0.95 | 9.56  | -0.90 | -5.11  | 0.003664 | -1.01 | -5.77  | 0.001057 |
| -0.95 | 2.99  | -1.15 | -8.86  | 4.25E-05 | -0.76 | -5.86  | 0.000927 |
| -0.95 | 8.41  | -0.97 | -4.63  | 0.007394 | -0.93 | -4.45  | 7.35E-03 |
| -0.95 | 7.94  | -0.95 | -4.52  | 0.008704 | -0.95 | -4.51  | 6.67E-03 |
| -0.95 | 4.09  | -1.08 | -10.61 | 8.77E-06 | -0.82 | -8.08  | 5.20E-05 |
| -0.95 | 4.17  | -1.10 | -6.27  | 0.000788 | -0.80 | -4.59  | 5.94E-03 |
| -0.95 | 8.58  | -0.93 | -9.28  | 2.86E-05 | -0.96 | -9.54  | 1.12E-05 |
| -0.95 | 3.78  | -0.70 | -7.18  | 0.000229 | -1.20 | -12.31 | 1.31E-06 |
| -0.95 | 4.04  | -1.07 | -9.13  | 3.07E-05 | -0.82 | -7.04  | 0.000191 |
| -0.94 | 3.89  | -1.12 | -9.16  | 2.99E-05 | -0.77 | -6.34  | 4.78E-04 |
| -0.94 | 5.93  | -0.93 | -5.54  | 0.002022 | -0.96 | -5.71  | 1.15E-03 |
| -0.94 | 4.49  | -1.02 | -5.12  | 0.003644 | -0.85 | -4.27  | 9.61E-03 |
| -0.94 | 3.14  | -0.77 | -6.81  | 0.000378 | -1.10 | -9.70  | 9.01E-06 |
| -0.94 | 8.31  | -0.77 | -4.49  | 0.009019 | -1.11 | -6.44  | 4.17E-04 |
| -0.94 | 3.83  | -1.06 | -7.21  | 2.25E-04 | -0.81 | -5.49  | 0.001577 |
| -0.94 | 4.21  | -1.22 | -9.21  | 2.93E-05 | -0.65 | -4.89  | 0.003825 |
| -0.94 | 3.20  | -0.74 | -5.49  | 0.002159 | -1.13 | -8.40  | 3.43E-05 |
| -0.93 | 3.76  | -0.99 | -7.17  | 2.31E-04 | -0.88 | -6.37  | 4.68E-04 |
| -0.93 | 5.25  | -0.96 | -4.74  | 0.006295 | -0.90 | -4.47  | 7.03E-03 |
| -0.93 | 4.16  | -0.87 | -6.58  | 0.000508 | -0.99 | -7.52  | 1.05E-04 |
| -0.93 | 5.08  | -0.96 | -5.14  | 0.003534 | -0.89 | -4.79  | 4.45E-03 |
| -0.93 | 3.96  | -0.78 | -6.17  | 0.000897 | -1.08 | -8.55  | 2.91E-05 |
| -0.92 | 6.92  | -0.83 | -5.27  | 2.93E-03 | -1.02 | -6.45  | 0.000411 |
| -0.92 | 4.32  | -0.95 | -7.81  | 0.000118 | -0.89 | -7.31  | 1.37E-04 |
| -0.91 | 4.37  | -0.85 | -6.85  | 0.000358 | -0.98 | -7.84  | 7.08E-05 |
| -0.91 | 2.75  | -0.83 | -7.66  | 1.39E-04 | -1.00 | -9.16  | 1.56E-05 |
| -0.91 | 3.29  | -0.69 | -5.18  | 0.003306 | -1.14 | -8.55  | 2.92E-05 |
| -0.91 | 3.40  | -0.76 | -6.49  | 0.000574 | -1.07 | -9.17  | 1.56E-05 |
| -0.91 | 4.22  | -0.94 | -5.81  | 0.001446 | -0.88 | -5.43  | 0.001717 |
| -0.91 | 4.41  | -0.84 | -5.40  | 0.002431 | -0.99 | -6.36  | 0.000473 |
| -0.91 | 4.85  | -0.92 | -4.81  | 5.62E-03 | -0.90 | -4.75  | 4.72E-03 |
| -0.91 | 3.87  | -0.93 | -7.21  | 0.000225 | -0.89 | -6.97  | 2.07E-04 |
| -0.91 | 4.06  | -0.76 | -6.28  | 0.00078  | -1.06 | -8.84  | 2.20E-05 |
| -0.91 | 4.10  | -0.80 | -8.93  | 4.03E-05 | -1.01 | -11.21 | 2.54E-06 |
| -0.91 | 5.96  | -0.90 | -4.53  | 0.008439 | -0.91 | -4.58  | 5.98E-03 |
| -0.90 | 7.35  | -0.88 | -5.77  | 0.001504 | -0.92 | -6.05  | 0.00072  |
| -0.90 | 4.10  | -0.74 | -5.71  | 0.00162  | -1.06 | -8.11  | 5.11E-05 |
| -0.90 | 3.46  | -1.13 | -7.87  | 0.000109 | -0.67 | -4.69  | 5.18E-03 |
| -0.90 | 3.99  | -0.77 | -4.71  | 6.51E-03 | -1.03 | -6.34  | 4.77E-04 |
| -0.90 | 8.20  | -1.02 | -5.71  | 0.001634 | -0.77 | -4.32  | 8.86E-03 |
| -0.90 | 3.58  | -0.82 | -6.14  | 0.000941 | -0.97 | -7.25  | 1.47E-04 |
| -0.89 | 3.50  | -0.59 | -4.60  | 7.79E-03 | -1.19 | -9.27  | 1.44E-05 |
| -0.89 | 4.23  | -0.75 | -5.59  | 0.001883 | -1.04 | -7.74  | 7.77E-05 |
| -0.89 | 3.76  | -0.84 | -4.75  | 0.006223 | -0.94 | -5.30  | 0.002106 |
| -0.88 | 3.90  | -0.87 | -6.31  | 0.000757 | -0.90 | -6.58  | 3.42E-04 |
| -0.88 | 4.03  | -0.91 | -8.32  | 6.61E-05 | -0.85 | -7.73  | 7.77E-05 |
| -0.88 | 10.72 | -0.79 | -5.57  | 1.94E-03 | -0.97 | -6.78  | 2.57E-04 |
| -0.88 | 2.94  | -0.92 | -8.80  | 4.25E-05 | -0.83 | -7.95  | 6.14E-05 |
| -0.87 | 4.04  | -0.97 | -7.49  | 0.000165 | -0.77 | -5.95  | 8.11E-04 |
| -0.87 | 7.91  | -0.79 | -6.04  | 1.07E-03 | -0.96 | -7.29  | 0.000139 |
| -0.87 | 4.04  | -0.78 | -6.56  | 0.00052  | -0.97 | -8.17  | 4.71E-05 |
| -0.87 | 5.74  | -0.99 | -7.44  | 0.000171 | -0.75 | -5.61  | 1.33E-03 |
| -0.87 | 3.62  | -0.91 | -8.62  | 5.1E-05  | -0.83 | -7.89  | 6.62E-05 |
| -0.87 | 4.56  | -1.01 | -9.48  | 2.45E-05 | -0.73 | -6.81  | 2.47E-04 |

|              |               |                                                                                |
|--------------|---------------|--------------------------------------------------------------------------------|
| 1439061_at   | Ccdc84        | coiled-coil domain containing 84                                               |
| 1442360_at   | Unknown       | Unknown                                                                        |
| 1450460_at   | Aqp3          | aquaporin 3                                                                    |
| 1425918_at   | Egln3         | EGL nine homolog 3 (C. elegans)                                                |
| 1454577_at   | Cdc20b        | cell division cycle 20 homolog B (S. cerevisiae)                               |
| 1431348_at   | Ppiifos       | peptidylprolyl isomerase F, opposite strand transcription unit                 |
| 1433584_at   | Gm5620        | predicted gene 5620                                                            |
| 1429344_at   | 9130022E09    | hypothetical 9130022E09                                                        |
| 1459490_at   | Fam198b       | RIKEN cDNA 1110032E23 gene                                                     |
| 1439386_x_at | Mat2a         | methionine adenosyltransferase II, alpha                                       |
| 1432687_at   | 4833406M21Rik | RIKEN cDNA 4833406M21 gene                                                     |
| 1436409_at   | Cox8a         | cytochrome c oxidase, subunit VIIIa                                            |
| 1455261_at   | Luc7l         | Luc7 homolog (S. cerevisiae)-like                                              |
| 1441639_at   | Zcchc8        | zinc finger, CCHC domain containing 8                                          |
| 1441372_at   | 5930405F01Rik | RIKEN cDNA 5930405F01 gene                                                     |
| 1427862_at   | LOC100047311  | similar to protein translocation complex beta subunit                          |
| 1417950_a_at | Apoa2         | apolipoprotein A-II                                                            |
| 1442911_at   | Riok2         | RIO kinase 2 (yeast)                                                           |
| 1449685_s_at | Oxsm          | 3-oxoacyl-ACP synthase, mitochondrial                                          |
| 1452344_at   | Synj2         | synaptojanin 2                                                                 |
| 1448804_at   | Cyp11a1       | cytochrome P450, family 11, subfamily a, polypeptide 1                         |
| 1429368_at   | Lrig3         | leucine-rich repeats and immunoglobulin-like domains 3                         |
| 1425258_at   | Cst11         | cystatin 11                                                                    |
| 1422978_at   | Cybb          | cytochrome b-245, beta polypeptide                                             |
| 1452676_a_at | Pnpt1         | polyribonucleotide nucleotidyltransferase 1                                    |
| 1428664_at   | Vip           | vasoactive intestinal polypeptide                                              |
| 1457015_at   | A230070E04Rik | RIKEN cDNA A230070E04 gene                                                     |
| 1457797_at   | A1605517      | expressed sequence A1605517                                                    |
| 1425025_at   | Tmem106a      | transmembrane protein 106A                                                     |
| 1452993_at   | 5430416O09Rik | RIKEN cDNA 5430416O09 gene                                                     |
| 1453503_at   | Spink12       | serine peptidase inhibitor, Kazal type 11                                      |
| 1446350_at   | Irga4         | integrin alpha 4                                                               |
| 1420333_at   | Txnrc8        | thioredoxin domain containing 8                                                |
| 1433214_x_at | 2700008E08Rik | RIKEN cDNA 2700008E08 gene                                                     |
| 1431481_at   | 4930443O20Rik | RIKEN cDNA 4930443O20 gene                                                     |
| 1432204_at   | 4930570B17Rik | RIKEN cDNA 4930570B17 gene                                                     |
| 1448539_a_at | Acy3          | aspartoacylase (aminoacylase) 3                                                |
| 1454482_at   | 5830474E16Rik | RIKEN cDNA 5830474E16 gene                                                     |
| 1436707_x_at | Ncaph         | non-SMC condensin I complex, subunit H                                         |
| 1458363_at   | Zdhhc17       | zinc finger, DHHC domain containing 17                                         |
| 1419981_at   | Riok3         | RIO kinase 3 (yeast)                                                           |
| 1421314_at   | Cttn          | cortactin                                                                      |
| 1441148_at   | Fktn          | fukutin                                                                        |
| 1447668_x_at | Efemp2        | epidermal growth factor-containing fibulin-like extracellular matrix protein 2 |
| 1436654_at   | Gen1          | Gen homolog 1, endonuclease (Drosophila)                                       |
| 1459932_at   | D8Erttd28e    | DNA segment, Chr 8, ERATO Doi 28, expressed                                    |
| 1453618_at   | 4933424N20Rik | RIKEN cDNA 4933424N20 gene                                                     |
| 1433009_at   | 9030607J07Rik | RIKEN cDNA 9030607J07 gene                                                     |
| 1425442_at   | Oscar         | osteoclast associated receptor                                                 |
| 1456629_at   | Kank3         | KN motif and ankyrin repeat domains 3                                          |
| 1452155_a_at | Ddx17         | DEAD (Asp-Glu-Ala-Asp) box polypeptide 17                                      |
| 1443235_at   | Eif2ak4       | eukaryotic translation initiation factor 2 alpha kinase 4                      |
| 1456313_x_at | Mrpl28        | mitochondrial ribosomal protein L28                                            |
| 1450061_at   | Enc1          | ectodermal-neural cortex 1                                                     |
| 1440826_s_at | 2610002I17Rik | RIKEN cDNA 2610002I17                                                          |
| 1444879_at   | Unknown       | Unknown                                                                        |
| 1446219_at   | D930015E06Rik | RIKEN cDNA D930015E06 gene                                                     |
| 1460272_at   | Ubl4b         | ubiquitin-like 4B                                                              |
| 1427424_at   | Galnt6        | polypeptide N-acetylgalactosaminyltransferase 6                                |
| 1445910_at   | C79999        | expressed sequence C79999                                                      |
| 1432631_at   | Prrc1         | proline-rich coiled-coil 1                                                     |
| 1439672_at   | Synj1         | synaptojanin 1                                                                 |
| 1459956_at   | dock10        | dedicator of cytokinesis 10                                                    |

|       |       |       |       |          |       |        |          |
|-------|-------|-------|-------|----------|-------|--------|----------|
| -0.87 | 6.20  | -0.88 | -5.18 | 3.32E-03 | -0.85 | -4.99  | 3.29E-03 |
| -0.86 | 2.98  | -0.97 | -9.16 | 2.99E-05 | -0.75 | -7.08  | 1.81E-04 |
| -0.86 | 4.53  | -0.84 | -5.16 | 0.003398 | -0.89 | -5.47  | 0.001628 |
| -0.86 | 4.09  | -0.63 | -5.69 | 1.66E-03 | -1.10 | -9.90  | 7.81E-06 |
| -0.86 | 2.98  | -0.48 | -5.56 | 0.001953 | -1.24 | -14.31 | 3.47E-07 |
| -0.86 | 3.78  | -0.90 | -7.90 | 0.000104 | -0.82 | -7.20  | 1.57E-04 |
| -0.86 | 3.69  | -0.69 | -5.21 | 0.003177 | -1.03 | -7.76  | 7.69E-05 |
| -0.86 | 3.53  | -0.94 | -6.01 | 0.00112  | -0.77 | -4.95  | 3.49E-03 |
| -0.85 | 3.95  | -0.98 | -7.19 | 2.29E-04 | -0.73 | -5.33  | 1.98E-03 |
| -0.85 | 9.54  | -0.53 | -4.43 | 0.009852 | -1.17 | -9.80  | 8.11E-06 |
| -0.85 | 2.87  | -0.86 | -7.45 | 0.00017  | -0.84 | -7.34  | 0.000132 |
| -0.85 | 3.48  | -1.05 | -8.00 | 9.76E-05 | -0.65 | -4.94  | 3.55E-03 |
| -0.85 | 6.97  | -0.83 | -4.97 | 0.004485 | -0.87 | -5.21  | 2.40E-03 |
| -0.85 | 3.83  | -0.90 | -5.60 | 0.001841 | -0.80 | -4.94  | 3.52E-03 |
| -0.85 | 3.86  | -0.94 | -8.19 | 7.78E-05 | -0.75 | -6.54  | 3.59E-04 |
| -0.85 | 5.63  | -0.89 | -6.52 | 0.000552 | -0.81 | -5.94  | 8.20E-04 |
| -0.85 | 6.63  | -0.66 | -4.54 | 8.37E-03 | -1.03 | -7.14  | 0.000168 |
| -0.84 | 3.81  | -0.81 | -4.58 | 0.008035 | -0.88 | -4.99  | 0.003295 |
| -0.84 | 7.40  | -0.81 | -4.70 | 0.006584 | -0.88 | -5.08  | 2.86E-03 |
| -0.84 | 8.00  | -0.84 | -5.16 | 3.45E-03 | -0.84 | -5.18  | 2.50E-03 |
| -0.84 | 5.00  | -0.92 | -5.28 | 0.002879 | -0.76 | -4.36  | 8.40E-03 |
| -0.84 | 3.39  | -0.88 | -7.97 | 9.76E-05 | -0.80 | -7.21  | 1.53E-04 |
| -0.84 | 3.70  | -1.01 | -9.31 | 2.86E-05 | -0.66 | -6.06  | 7.09E-04 |
| -0.84 | 3.87  | -0.90 | -6.47 | 0.00059  | -0.77 | -5.53  | 0.001503 |
| -0.83 | 7.47  | -0.76 | -4.98 | 4.43E-03 | -0.91 | -5.96  | 0.000794 |
| -0.83 | 8.25  | -0.88 | -5.77 | 0.00151  | -0.78 | -5.09  | 2.83E-03 |
| -0.83 | 4.77  | -0.92 | -5.41 | 0.002415 | -0.75 | -4.40  | 7.88E-03 |
| -0.83 | 3.11  | -0.77 | -4.97 | 4.45E-03 | -0.89 | -5.77  | 1.06E-03 |
| -0.83 | 4.12  | -0.65 | -4.56 | 0.008153 | -1.01 | -7.09  | 1.79E-04 |
| -0.83 | 4.59  | -0.79 | -7.00 | 0.000291 | -0.86 | -7.63  | 9.00E-05 |
| -0.83 | 3.74  | -0.68 | -5.33 | 0.002731 | -0.98 | -7.72  | 7.86E-05 |
| -0.83 | 3.91  | -0.97 | -7.59 | 0.000147 | -0.69 | -5.41  | 0.001755 |
| -0.83 | 4.58  | -0.78 | -5.63 | 1.76E-03 | -0.87 | -6.28  | 5.21E-04 |
| -0.82 | 4.93  | -0.79 | -5.08 | 0.003801 | -0.86 | -5.54  | 1.47E-03 |
| -0.82 | 4.41  | -0.85 | -6.72 | 0.000425 | -0.79 | -6.23  | 5.52E-04 |
| -0.82 | 3.23  | -0.59 | -5.11 | 3.65E-03 | -1.05 | -9.14  | 1.60E-05 |
| -0.82 | 7.64  | -0.70 | -4.92 | 0.004772 | -0.94 | -6.59  | 3.40E-04 |
| -0.82 | 3.24  | -0.92 | -6.80 | 0.000381 | -0.72 | -5.35  | 0.001908 |
| -0.81 | 3.48  | -0.72 | -6.96 | 0.000305 | -0.91 | -8.82  | 2.21E-05 |
| -0.81 | 3.95  | -0.65 | -5.68 | 0.001679 | -0.98 | -8.57  | 2.88E-05 |
| -0.81 | 8.21  | -0.93 | -6.18 | 8.97E-04 | -0.70 | -4.61  | 5.73E-03 |
| -0.81 | 4.76  | -0.73 | -5.73 | 0.001585 | -0.89 | -6.94  | 2.13E-04 |
| -0.81 | 4.46  | -0.81 | -4.87 | 0.005102 | -0.80 | -4.81  | 4.28E-03 |
| -0.81 | 6.08  | -0.88 | -5.99 | 1.15E-03 | -0.74 | -5.01  | 3.18E-03 |
| -0.81 | 4.49  | -0.86 | -5.18 | 0.003344 | -0.76 | -4.56  | 0.006147 |
| -0.80 | 3.28  | -0.45 | -4.76 | 0.006132 | -1.15 | -12.07 | 1.38E-06 |
| -0.80 | 5.26  | -0.87 | -5.99 | 0.001144 | -0.73 | -5.03  | 3.08E-03 |
| -0.80 | 4.21  | -0.68 | -5.48 | 0.00217  | -0.93 | -7.51  | 1.07E-04 |
| -0.80 | 3.88  | -0.82 | -5.60 | 1.83E-03 | -0.79 | -5.44  | 1.69E-03 |
| -0.80 | 3.46  | -0.81 | -6.78 | 0.000391 | -0.79 | -6.59  | 3.36E-04 |
| -0.80 | 9.55  | -0.62 | -5.54 | 0.00202  | -0.98 | -8.69  | 2.48E-05 |
| -0.80 | 3.14  | -0.53 | -4.42 | 1.00E-02 | -1.06 | -8.77  | 2.27E-05 |
| -0.79 | 4.60  | -0.52 | -5.49 | 0.00214  | -1.07 | -11.28 | 2.54E-06 |
| -0.79 | 10.26 | -0.76 | -5.40 | 0.002447 | -0.82 | -5.80  | 1.01E-03 |
| -0.79 | 8.32  | -0.79 | -4.71 | 0.006507 | -0.79 | -4.72  | 4.91E-03 |
| -0.79 | 2.87  | -0.67 | -6.80 | 0.000381 | -0.91 | -9.34  | 1.38E-05 |
| -0.79 | 4.20  | -0.79 | -5.37 | 2.58E-03 | -0.79 | -5.33  | 2.00E-03 |
| -0.79 | 3.56  | -0.71 | -4.91 | 0.004809 | -0.87 | -5.99  | 7.70E-04 |
| -0.79 | 4.56  | -0.80 | -5.97 | 0.001171 | -0.77 | -5.72  | 0.001132 |
| -0.78 | 3.72  | -0.56 | -5.27 | 2.94E-03 | -1.00 | -9.44  | 1.25E-05 |
| -0.78 | 5.18  | -0.74 | -5.75 | 0.001543 | -0.82 | -6.43  | 4.28E-04 |
| -0.78 | 2.73  | -0.94 | -7.21 | 0.000225 | -0.62 | -4.71  | 5.03E-03 |
| -0.78 | 3.23  | -0.95 | -8.38 | 6.23E-05 | -0.61 | -5.42  | 1.74E-03 |

|              |               |                                                                |
|--------------|---------------|----------------------------------------------------------------|
| 1442201_at   | Unknown       | Unknown                                                        |
| 1445886_at   | Elk3          | ELK3, member of ETS oncogene family                            |
| 1445908_at   | Eif2b5        | Eukaryotic translation initiation factor 2B, subunit 5 epsilon |
| 1429863_at   | Lonrf3        | LON peptidase N-terminal domain and ring finger 3              |
| 1431629_at   | 9130221D24Rik | RIKEN cDNA 9130221D24 gene                                     |
| 1445540_at   | Dnm3          | dynamins 3                                                     |
| 1432743_at   | 4930443G03Rik | RIKEN cDNA 4930443G03 gene                                     |
| 1438429_at   | 2610319H10Rik | RIKEN cDNA 2610319H10 gene                                     |
| 1434525_at   | Pkn3          | protein kinase N3                                              |
| 1458333_x_at | Ulf1          | undifferentiated embryonic cell transcription factor 1         |
| 1444696_at   | BC059841      | CDNA sequence BC059841                                         |
| 1453424_at   | Fyco1         | FYVE and coiled-coil domain containing 1                       |
| 1423464_at   | D2Erd750e     | DNA segment, Chr 2, ERATO Doi 750, expressed                   |
| 1442681_at   | Tsen2         | tRNA splicing endonuclease 2 homolog (S. cerevisiae)           |
| 1449819_at   | Dmc1          | DMC1 dosage suppressor of mck1 homolog                         |
| 1439136_at   | Ssbp3         | single-stranded DNA binding protein 3                          |
| 1433597_at   | Arglu1        | arginine and glutamate rich 1                                  |
| 1444868_at   | Lrrc9         | Leucine rich repeat containing 9                               |
| 1442421_at   | RIKEN...      | RIKEN cDNA 2900083111 gene                                     |
| 1450631_x_at | Defa24        | defensin, alpha, 24                                            |
| 1459549_at   | Dph5          | DPH5 homolog (S. cerevisiae)                                   |
| 1439310_at   | A630012P03Rik | RIKEN cDNA A630012P03 gene                                     |
| 1421253_at   | Nrap          | nebulin-related anchoring protein                              |
| 1427433_s_at | Hoxa3         | homeobox A3                                                    |
| 1425108_a_at | Smagp         | small cell adhesion glycoprotein                               |
| 1437603_at   | BC050777      | cDNA sequence BC050777                                         |
| 1454906_at   | Rarb          | retinoic acid receptor, beta                                   |
| 1445406_at   | C77494        | expressed sequence C77494                                      |
| 1440309_at   | RIKEN...      | RIKEN cDNA 4833430A08 gene                                     |
| 1439731_at   | E130309F12Rik | RIKEN cDNA E130309F12 gene                                     |
| 1423307_s_at | Tgoln1        | trans-golgi network protein                                    |
| 1430086_at   | Chrna9        | cholinergic receptor, nicotinic, alpha polypeptide 9           |
| 1426608_at   | Gm7120        | predicted gene 7120                                            |
| 1446908_at   | Unknown       | Unknown                                                        |
| 1441454_at   | Zhx3          | zinc fingers and homeoboxes 3                                  |
| 1443730_at   | Fam129b       | family with sequence similarity 129, member B                  |
| 1429989_at   | 1700008A04Rik | RIKEN cDNA 1700008A04 gene                                     |
| 1460421_at   | Zfp133        | zinc finger protein 133                                        |
| 1431186_at   | Dlg5          | discs, large homolog 5 (Drosophila)                            |
| 1421187_at   | Ccr2          | chemokine (C-C motif) receptor 2                               |
| 1431536_at   | 4933432K03Rik | RIKEN cDNA 4933432K03 gene                                     |
| 1419563_at   | Birc6         | baculoviral IAP repeat-containing 6                            |
| 1417542_at   | Rps6ka2       | ribosomal protein S6 kinase, polypeptide 2                     |
| 1446999_at   | Unknown       | Unknown                                                        |
| 1427084_a_at | Map4k5        | mitogen-activated protein kinase kinase kinase kinase 5        |
| 1417679_at   | Gfi1          | growth factor independent 1                                    |
| 1441397_at   | Pard3         | par-3 (partitioning defective 3) homolog (C. elegans)          |
| 1453945_at   | 2310005E17Rik | RIKEN cDNA 2310005E17 gene                                     |
| 1458407_s_at | Unknown       | Unknown                                                        |
| 1444527_at   | Unknown       | Unknown                                                        |
| 1443226_at   | Sike1         | Suppressor of IKBKE 1                                          |
| 1430408_at   | Cacna1a       | calcium channel, voltage-dependent, P/Q type, alpha 1A subunit |
| 1416812_at   | Tia1          | cytotoxic granule-associated RNA binding protein 1             |
| 1449114_at   | Stk3          | serine/threonine kinase 3 (Ste20, yeast homolog)               |
| 1419815_at   | Mett11d1      | methyltransferase 11 domain containing 1                       |
| 1447383_at   | Zfp810        | zinc finger protein 810                                        |
| 1433415_at   | Rfx2          | regulatory factor X, 2 (influences HLA class II expression)    |
| 1416067_at   | Ildr1         | interferon-related developmental regulator 1                   |
| 1447964_at   | Tti           | tubulin tyrosine ligase                                        |
| 1451711_at   | Wnt9b         | wingless-type MMTV integration site 9B                         |
| 1416916_at   | Elf3          | E74-like factor 3                                              |
| 1425215_at   | Ffar2         | free fatty acid receptor 2                                     |
| 1433930_at   | Hpse          | heparanase                                                     |

|       |       |       |       |          |       |        |          |
|-------|-------|-------|-------|----------|-------|--------|----------|
| -0.78 | 4.29  | -0.74 | -8.09 | 8.64E-05 | -0.81 | -8.91  | 2.04E-05 |
| -0.77 | 4.80  | -0.92 | -8.59 | 5.11E-05 | -0.63 | -5.95  | 8.15E-04 |
| -0.77 | 3.60  | -0.97 | -9.07 | 3.27E-05 | -0.58 | -5.37  | 0.00185  |
| -0.77 | 8.84  | -0.64 | -5.09 | 0.003754 | -0.90 | -7.15  | 0.000164 |
| -0.77 | 4.87  | -0.94 | -8.14 | 8.26E-05 | -0.60 | -5.18  | 2.48E-03 |
| -0.77 | 3.74  | -0.78 | -6.00 | 0.001132 | -0.76 | -5.87  | 9.15E-04 |
| -0.77 | 3.80  | -0.68 | -4.82 | 0.005527 | -0.86 | -6.04  | 7.26E-04 |
| -0.77 | 2.86  | -0.99 | -8.39 | 6.23E-05 | -0.55 | -4.65  | 5.48E-03 |
| -0.77 | 6.65  | -0.74 | -4.92 | 0.004785 | -0.79 | -5.26  | 2.20E-03 |
| -0.77 | 3.31  | -0.63 | -4.83 | 5.46E-03 | -0.90 | -6.93  | 0.000215 |
| -0.77 | 6.19  | -0.77 | -4.46 | 0.009436 | -0.76 | -4.42  | 0.007659 |
| -0.76 | 4.28  | -0.68 | -5.78 | 0.001488 | -0.85 | -7.24  | 1.49E-04 |
| -0.76 | 5.12  | -0.70 | -6.37 | 6.88E-04 | -0.83 | -7.55  | 1.01E-04 |
| -0.76 | 5.24  | -0.62 | -4.67 | 0.006956 | -0.91 | -6.82  | 2.43E-04 |
| -0.76 | 4.00  | -0.78 | -5.48 | 0.002174 | -0.74 | -5.22  | 2.36E-03 |
| -0.76 | 3.71  | -0.91 | -7.44 | 0.000171 | -0.62 | -5.06  | 2.97E-03 |
| -0.76 | 10.15 | -0.71 | -6.09 | 0.000998 | -0.81 | -6.89  | 0.000227 |
| -0.76 | 4.38  | -0.77 | -5.27 | 2.94E-03 | -0.75 | -5.13  | 0.002685 |
| -0.76 | 4.99  | -0.82 | -6.10 | 0.000998 | -0.70 | -5.20  | 2.43E-03 |
| -0.76 | 4.71  | -0.67 | -5.40 | 0.002431 | -0.84 | -6.72  | 2.82E-04 |
| -0.76 | 5.07  | -0.82 | -5.78 | 1.49E-03 | -0.70 | -4.92  | 3.62E-03 |
| -0.75 | 3.99  | -0.62 | -6.31 | 0.000757 | -0.88 | -8.93  | 2.04E-05 |
| -0.75 | 6.38  | -0.50 | -4.90 | 0.004903 | -1.00 | -9.70  | 9.01E-06 |
| -0.75 | 3.23  | -0.84 | -7.06 | 0.00027  | -0.66 | -5.57  | 0.00142  |
| -0.75 | 5.15  | -0.72 | -4.45 | 0.009518 | -0.78 | -4.80  | 0.004345 |
| -0.75 | 3.61  | -0.52 | -5.86 | 1.36E-03 | -0.98 | -11.15 | 2.67E-06 |
| -0.75 | 6.29  | -0.67 | -4.72 | 0.006449 | -0.83 | -5.84  | 9.59E-04 |
| -0.75 | 3.81  | -0.89 | -6.38 | 0.000682 | -0.60 | -4.30  | 9.11E-03 |
| -0.75 | 3.77  | -0.57 | -4.93 | 4.71E-03 | -0.92 | -7.91  | 6.54E-05 |
| -0.75 | 4.85  | -0.92 | -6.85 | 0.000356 | -0.57 | -4.27  | 9.60E-03 |
| -0.75 | 9.44  | -0.82 | -6.77 | 0.000391 | -0.67 | -5.53  | 0.001496 |
| -0.74 | 3.42  | -0.82 | -8.40 | 6.23E-05 | -0.67 | -6.87  | 0.000233 |
| -0.74 | 3.28  | -0.86 | -6.89 | 0.000342 | -0.62 | -4.98  | 3.34E-03 |
| -0.74 | 4.24  | -0.70 | -5.70 | 1.65E-03 | -0.78 | -6.37  | 4.68E-04 |
| -0.74 | 10.76 | -0.62 | -6.54 | 0.000535 | -0.86 | -9.01  | 1.86E-05 |
| -0.74 | 4.61  | -0.67 | -4.53 | 0.008441 | -0.81 | -5.49  | 1.58E-03 |
| -0.74 | 5.08  | -0.58 | -4.68 | 6.88E-03 | -0.89 | -7.17  | 1.62E-04 |
| -0.74 | 3.82  | -0.75 | -4.74 | 0.006236 | -0.73 | -4.59  | 0.005878 |
| -0.74 | 4.65  | -0.70 | -4.51 | 0.00876  | -0.77 | -4.95  | 0.003485 |
| -0.74 | 2.88  | -0.85 | -6.77 | 0.000391 | -0.63 | -4.99  | 3.29E-03 |
| -0.74 | 3.45  | -0.61 | -4.65 | 0.00717  | -0.86 | -6.54  | 3.58E-04 |
| -0.73 | 5.80  | -0.78 | -7.12 | 2.48E-04 | -0.69 | -6.35  | 4.77E-04 |
| -0.73 | 8.15  | -0.77 | -5.27 | 0.002942 | -0.70 | -4.84  | 4.10E-03 |
| -0.73 | 4.05  | -0.64 | -4.63 | 0.007412 | -0.83 | -5.98  | 7.75E-04 |
| -0.73 | 8.50  | -0.71 | -4.53 | 8.56E-03 | -0.75 | -4.78  | 0.004505 |
| -0.73 | 3.26  | -0.72 | -6.55 | 0.000527 | -0.74 | -6.76  | 0.000262 |
| -0.73 | 3.66  | -0.70 | -6.28 | 0.000781 | -0.76 | -6.88  | 2.31E-04 |
| -0.73 | 3.39  | -0.69 | -5.53 | 0.002033 | -0.77 | -6.21  | 5.70E-04 |
| -0.73 | 6.07  | -0.74 | -5.16 | 0.003438 | -0.71 | -4.98  | 3.34E-03 |
| -0.72 | 3.50  | -0.59 | -5.04 | 4.00E-03 | -0.86 | -7.35  | 1.30E-04 |
| -0.72 | 2.83  | -0.69 | -6.47 | 0.000597 | -0.76 | -7.16  | 1.64E-04 |
| -0.72 | 5.36  | -0.57 | -5.09 | 0.0038   | -0.88 | -7.91  | 6.54E-05 |
| -0.72 | 7.89  | -0.66 | -5.65 | 1.74E-03 | -0.79 | -6.70  | 0.000284 |
| -0.72 | 4.34  | -0.69 | -5.09 | 0.0038   | -0.75 | -5.50  | 1.56E-03 |
| -0.72 | 5.90  | -0.57 | -4.80 | 0.005704 | -0.87 | -7.37  | 1.29E-04 |
| -0.72 | 4.19  | -0.52 | -5.71 | 0.001631 | -0.92 | -10.15 | 6.82E-06 |
| -0.72 | 4.87  | -0.67 | -5.23 | 0.003078 | -0.77 | -6.03  | 7.27E-04 |
| -0.72 | 11.41 | -0.63 | -4.56 | 8.15E-03 | -0.80 | -5.77  | 1.05E-03 |
| -0.71 | 5.11  | -0.66 | -5.14 | 0.003534 | -0.76 | -5.93  | 0.000832 |
| -0.71 | 5.23  | -0.82 | -6.91 | 0.000325 | -0.60 | -5.05  | 0.00301  |
| -0.71 | 5.07  | -0.64 | -5.71 | 1.62E-03 | -0.78 | -6.91  | 2.23E-04 |
| -0.71 | 4.43  | -0.75 | -7.03 | 0.000283 | -0.67 | -6.21  | 5.70E-04 |
| -0.70 | 3.18  | -0.73 | -5.64 | 0.001747 | -0.68 | -5.22  | 2.33E-03 |

|              |               |                                                                            |
|--------------|---------------|----------------------------------------------------------------------------|
| 1433052_at   | Elavl2        | ELAV (embryonic lethal, abnormal vision, Drosophila)-like 2 (Hu antigen B) |
| 1458898_at   | Unknown       | Unknown                                                                    |
| 1449182_at   | Retn          | resistin                                                                   |
| 1442592_at   | Ppapdc3       | phosphatidic acid phosphatase type 2 domain containing 3                   |
| 1427503_at   | A1324046      | expressed sequence A1324046                                                |
| 1441247_at   | Inpp5j        | inositol polyphosphate 5-phosphatase J                                     |
| 1458495_at   | Unknown       | Unknown                                                                    |
| 1434557_at   | Hip1          | huntingtin interacting protein 1                                           |
| 1440943_at   | B230208H17Rik | RIKEN cDNA B230208H17 gene                                                 |
| 1427454_at   | Hoxc6         | homeobox C6                                                                |
| 1443491_at   | Ptpkr         | protein tyrosine phosphatase, receptor type, K                             |
| 1421406_at   | Entpd7        | ectonucleoside triphosphate diphosphohydrolase 7                           |
| 1439318_at   | Mast4         | microtubule associated serine/threonine kinase family member 4             |
| 1447217_at   | Uhrf2         | ubiquitin-like, containing PHD and RING finger domains 2                   |
| 1445705_x_at | Dpp8          | dipeptidylpeptidase 8                                                      |
| 1432281_a_at | Itgb6         | integrin beta 6                                                            |
| 1441199_at   | Ptpm          | protein tyrosine phosphatase, receptor type, M                             |
| 1431367_at   | March1        | membrane-associated ring finger (C3HC4) 1                                  |
| 1458052_at   | Unknown       | Unknown                                                                    |
| 1441432_at   | C820005J03Rik | RIKEN cDNA C820005J03 gene                                                 |
| 1456635_at   | Gm2397        | predicted gene 2397                                                        |
| 1447951_at   | RIKEN...      | RIKEN cDNA 5730403B10 gene                                                 |
| 1450256_at   | Cer1          | cerberus 1 homolog (Xenopus laevis)                                        |
| 1448409_at   | Lrmp          | lymphoid-restricted membrane protein                                       |
| 1421627_at   | Evx1          | even skipped homeotic gene 1 homolog                                       |
| 1443592_at   | AA617406      | expressed sequence AA617406                                                |
| 1424295_at   | Dppa3         | developmental pluripotency-associated 3                                    |
| 1440828_x_at | Phf7          | PHD finger protein 7                                                       |
| 1456832_at   | Atrx          | alpha thalassemia/mental retardation syndrome X-linked homolog (human)     |
| 1437091_at   | Accn4         | amiloride-sensitive cation channel 4, pituitary                            |
| 1460029_at   | Gtbbp5        | GTP binding protein 5                                                      |
| 1421113_at   | Pga5          | pepsinogen 5, group I                                                      |
| 1459244_at   | AU014756      | expressed sequence AU014756                                                |
| 1442446_at   | Zfp523        | Zinc finger protein 523                                                    |
| 1419762_at   | Ubd           | ubiquitin D                                                                |
| 1442085_at   | Whsc111       | Wolf-Hirschhorn syndrome candidate 1-like 1 (human)                        |
| 1437954_at   | RIKEN...      | RIKEN cDNA 2410016O06 gene                                                 |
| 1458125_at   | Unknown       | Unknown                                                                    |
| 1443519_at   | Gm11203       | predicted gene 11203                                                       |
| 1449755_at   | D7Erd183e     | DNA segment, Chr 7, ERATO Doi 183, expressed                               |
| 1445753_at   | Aox311        | aldehyde oxidase 3-like 1                                                  |
| 1433050_at   | 5730478J17Rik | RIKEN cDNA 5730478J17 gene                                                 |
| 1434923_at   | Cox19         | COX19 cytochrome c oxidase assembly homolog (S. cerevisiae)                |
| 1451739_at   | Klf5          | Kruppel-like factor 5                                                      |
| 1434803_a_at | Syncn         | syncollin                                                                  |
| 1419621_at   | Ankrd2        | ankyrin repeat domain 2 (stretch responsive muscle)                        |
| 1432793_at   | 4930401B11Rik | RIKEN cDNA 4930401B11 gene                                                 |
| 1421725_at   | Slc26a5       | solute carrier family 26, member 5                                         |
| 1446003_at   | Unknown       | Unknown                                                                    |
| 1443625_at   | Naa40         | N(alpha)-acetyltransferase 40, NatD catalytic subunit, homolog             |
| 1451712_at   | 8030411F24Rik | RIKEN cDNA 8030411F24 gene                                                 |
| 1452019_at   | Cyrr1         | cysteine and tyrosine-rich protein 1                                       |
| 1425883_at   | Smg6          | Smg-6 homolog, nonsense mediated mRNA decay factor (C. elegans)            |
| 1418475_at   | Scnn1b        | sodium channel, nonvoltage-gated 1 beta                                    |
| 1429960_at   | 4930438A08Rik | RIKEN cDNA 4930438A08 gene                                                 |
| 1444898_at   | Unknown       | Unknown                                                                    |
| 1449495_at   | Reg3a         | regenerating islet-derived 3 alpha                                         |
| 1448397_at   | Gjb6          | gap junction protein, beta 6                                               |
| 1445865_at   | Unknown       | Unknown                                                                    |
| 1444237_at   | LOC100045758  | hypothetical protein LOC100045758; similar to EMO2                         |
| 1452349_x_at | Ifi205        | interferon activated gene 205                                              |
| 1419654_at   | Tle3          | transducin-like enhancer of split 3, homolog of Drosophila E(spl)          |
| 1430922_at   | 5530401A14Rik | RIKEN cDNA 5530401A14 gene                                                 |

|       |       |       |       |          |       |       |          |
|-------|-------|-------|-------|----------|-------|-------|----------|
| -0.70 | 2.70  | -0.60 | -5.49 | 0.002159 | -0.80 | -7.30 | 1.38E-04 |
| -0.70 | 3.80  | -0.70 | -5.61 | 0.001823 | -0.71 | -5.71 | 1.14E-03 |
| -0.70 | 6.21  | -0.61 | -4.65 | 7.17E-03 | -0.79 | -5.99 | 0.00077  |
| -0.70 | 5.50  | -0.59 | -4.71 | 0.006507 | -0.81 | -6.44 | 0.000418 |
| -0.70 | 5.54  | -0.70 | -5.24 | 0.003039 | -0.70 | -5.19 | 2.47E-03 |
| -0.70 | 3.41  | -0.75 | -5.27 | 2.94E-03 | -0.65 | -4.61 | 5.72E-03 |
| -0.70 | 4.20  | -0.93 | -9.54 | 2.32E-05 | -0.47 | -4.80 | 4.38E-03 |
| -0.70 | 8.54  | -0.67 | -5.26 | 0.002961 | -0.72 | -5.71 | 1.14E-03 |
| -0.69 | 3.99  | -0.61 | -5.66 | 0.001724 | -0.78 | -7.16 | 1.63E-04 |
| -0.69 | 5.46  | -0.79 | -8.37 | 6.23E-05 | -0.60 | -6.34 | 0.000478 |
| -0.69 | 3.15  | -0.91 | -9.20 | 2.93E-05 | -0.47 | -4.73 | 0.004837 |
| -0.69 | 3.83  | -0.64 | -5.02 | 0.004158 | -0.74 | -5.79 | 1.03E-03 |
| -0.69 | 3.47  | -0.63 | -6.00 | 0.001126 | -0.75 | -7.08 | 1.81E-04 |
| -0.69 | 5.91  | -0.71 | -4.97 | 4.48E-03 | -0.67 | -4.72 | 4.93E-03 |
| -0.69 | 5.40  | -0.69 | -5.35 | 0.002634 | -0.69 | -5.34 | 1.97E-03 |
| -0.69 | 2.94  | -0.95 | -9.99 | 1.42E-05 | -0.42 | -4.43 | 7.49E-03 |
| -0.69 | 4.33  | -0.80 | -6.51 | 0.000558 | -0.57 | -4.59 | 0.005869 |
| -0.69 | 4.17  | -0.67 | -4.96 | 0.0045   | -0.70 | -5.14 | 0.002647 |
| -0.68 | 5.01  | -0.82 | -7.52 | 1.58E-04 | -0.55 | -5.06 | 2.98E-03 |
| -0.68 | 3.72  | -0.47 | -4.64 | 0.007345 | -0.89 | -8.79 | 2.24E-05 |
| -0.68 | 5.54  | -0.58 | -5.46 | 0.002252 | -0.79 | -7.39 | 1.27E-04 |
| -0.68 | 5.31  | -0.78 | -6.61 | 4.88E-04 | -0.58 | -4.96 | 3.41E-03 |
| -0.68 | 4.08  | -0.62 | -4.58 | 0.008037 | -0.74 | -5.49 | 1.58E-03 |
| -0.68 | 4.52  | -0.68 | -5.48 | 0.002174 | -0.68 | -5.43 | 0.001717 |
| -0.68 | 4.53  | -0.69 | -5.84 | 0.001393 | -0.66 | -5.56 | 0.001443 |
| -0.68 | 4.50  | -0.72 | -6.13 | 0.00096  | -0.63 | -5.36 | 1.89E-03 |
| -0.68 | 5.14  | -0.83 | -6.92 | 3.23E-04 | -0.52 | -4.38 | 8.16E-03 |
| -0.68 | 3.29  | -0.75 | -6.25 | 0.000814 | -0.60 | -4.96 | 3.42E-03 |
| -0.67 | 4.39  | -0.59 | -4.78 | 0.005911 | -0.76 | -6.16 | 6.13E-04 |
| -0.67 | 5.31  | -0.66 | -6.27 | 7.88E-04 | -0.69 | -6.51 | 3.77E-04 |
| -0.67 | 5.66  | -0.72 | -7.30 | 0.0002   | -0.62 | -6.32 | 0.000489 |
| -0.67 | 4.03  | -0.57 | -4.96 | 0.004526 | -0.78 | -6.77 | 0.000262 |
| -0.67 | 3.01  | -0.58 | -5.87 | 0.001355 | -0.76 | -7.65 | 8.88E-05 |
| -0.67 | 5.21  | -0.51 | -4.78 | 0.00591  | -0.83 | -7.81 | 7.20E-05 |
| -0.67 | 4.53  | -0.73 | -6.18 | 8.97E-04 | -0.61 | -5.11 | 2.77E-03 |
| -0.67 | 6.14  | -0.71 | -5.92 | 0.001257 | -0.63 | -5.28 | 2.15E-03 |
| -0.67 | 5.18  | -0.62 | -4.69 | 0.006779 | -0.72 | -5.48 | 1.61E-03 |
| -0.67 | 3.80  | -0.55 | -4.96 | 4.50E-03 | -0.78 | -6.98 | 0.000207 |
| -0.67 | 3.30  | -0.80 | -6.97 | 0.000302 | -0.53 | -4.64 | 0.005558 |
| -0.66 | 4.31  | -0.58 | -5.14 | 0.003523 | -0.75 | -6.67 | 2.99E-04 |
| -0.66 | 3.13  | -0.66 | -6.69 | 0.00044  | -0.67 | -6.84 | 2.40E-04 |
| -0.66 | 4.00  | -0.65 | -5.40 | 0.002431 | -0.68 | -5.64 | 1.29E-03 |
| -0.66 | 9.22  | -0.69 | -5.42 | 2.38E-03 | -0.63 | -4.94 | 3.52E-03 |
| -0.66 | 3.29  | -0.81 | -6.93 | 0.000322 | -0.51 | -4.35 | 8.51E-03 |
| -0.66 | 5.93  | -0.63 | -5.67 | 0.001709 | -0.69 | -6.23 | 0.000552 |
| -0.66 | 5.70  | -0.68 | -5.16 | 3.41E-03 | -0.63 | -4.77 | 0.004511 |
| -0.66 | 3.56  | -0.72 | -6.41 | 0.000649 | -0.59 | -5.23 | 2.32E-03 |
| -0.65 | 4.81  | -0.81 | -7.11 | 0.000253 | -0.49 | -4.31 | 9.10E-03 |
| -0.65 | 4.50  | -0.61 | -5.08 | 0.0038   | -0.70 | -5.84 | 9.58E-04 |
| -0.65 | 3.53  | -0.68 | -5.54 | 0.002023 | -0.63 | -5.11 | 2.78E-03 |
| -0.65 | 3.67  | -0.55 | -5.21 | 3.21E-03 | -0.75 | -7.06 | 1.86E-04 |
| -0.65 | 4.90  | -0.63 | -4.59 | 0.007875 | -0.67 | -4.92 | 0.003625 |
| -0.65 | 3.45  | -0.61 | -4.81 | 0.005629 | -0.69 | -5.49 | 0.001577 |
| -0.65 | 4.69  | -0.66 | -6.08 | 1.01E-03 | -0.64 | -5.83 | 9.63E-04 |
| -0.65 | 4.87  | -0.79 | -8.45 | 6.05E-05 | -0.50 | -5.36 | 1.89E-03 |
| -0.65 | 4.54  | -0.64 | -5.13 | 0.003606 | -0.65 | -5.24 | 2.30E-03 |
| -0.64 | 4.01  | -0.57 | -5.73 | 0.001585 | -0.72 | -7.25 | 1.47E-04 |
| -0.64 | 11.27 | -0.59 | -5.79 | 0.001486 | -0.70 | -6.79 | 2.56E-04 |
| -0.64 | 3.31  | -0.75 | -6.07 | 1.02E-03 | -0.53 | -4.28 | 0.00941  |
| -0.64 | 4.75  | -0.55 | -5.30 | 0.002813 | -0.73 | -6.97 | 0.000207 |
| -0.64 | 2.63  | -0.71 | -5.76 | 0.001518 | -0.57 | -4.58 | 6.00E-03 |
| -0.64 | 9.00  | -0.58 | -4.66 | 7.03E-03 | -0.69 | -5.52 | 1.53E-03 |
| -0.63 | 3.03  | -0.68 | -5.53 | 0.002027 | -0.58 | -4.74 | 4.77E-03 |

|              |               |                                                                            |
|--------------|---------------|----------------------------------------------------------------------------|
| 1446930_at   | Unknown       | Unknown                                                                    |
| 1438163_x_at | Rhbdd2        | rhomboid domain containing 2                                               |
| 1442392_at   | C1gtnf7       | C1q and tumor necrosis factor related protein 7                            |
| 1433191_at   | A430105P17Rik | RIKEN cDNA A430105P17 gene                                                 |
| 1444109_at   | C130009A20Rik | RIKEN cDNA C130009A20 gene                                                 |
| 1437452_x_at | Vdac1         | voltage-dependent anion channel 1                                          |
| 1441086_at   | 4930451111Rik | RIKEN cDNA 4930451111 gene                                                 |
| 1422869_at   | Mertk         | c-mer proto-oncogene tyrosine kinase                                       |
| 1442699_at   | ENSMUSG...    | ENSMUSG0000084048                                                          |
| 1440214_at   | RIKEN...      | RIKEN cDNA A630001G21 gene                                                 |
| 1442197_at   | A1480624      | expressed sequence A1480624                                                |
| 1428002_at   | Saal1         | serum amyloid A-like 1                                                     |
| 1432308_at   | 1700058C13Rik | RIKEN cDNA 1700058C13 gene                                                 |
| 1456510_x_at | Higd1c        | HIG1 domain family, member 1C                                              |
| 1428634_at   | Twistnb       | TWIST neighbor                                                             |
| 1422274_at   | Gja8          | gap junction protein, alpha 8                                              |
| 1433396_at   | 4921504P13Rik | RIKEN cDNA 4921504P13 gene                                                 |
| 1448793_a_at | Sdc4          | syndecan 4                                                                 |
| 1431305_at   | Mcoln1        | mucopolin 1                                                                |
| 1429565_s_at | Lce1m         | late cornified envelope 1M                                                 |
| 1445222_at   | Cd22          | CD22 antigen; hypothetical protein LOC100047973                            |
| 1454321_at   | 1500005C15Rik | RIKEN cDNA 1500005C15 gene                                                 |
| 1416436_a_at | Uqcc          | ubiquinol-cytochrome c reductase complex chaperone, CBP3 homolog           |
| 1443115_at   | Tgfb2         | transforming growth factor, beta receptor II                               |
| 1459420_at   | Unknown       | Unknown                                                                    |
| 1432041_at   | 4930519A11Rik | RIKEN cDNA 4930519A11 gene                                                 |
| 1442323_at   | Slc10a7       | solute carrier family 10 (sodium/bile acid cotransporter family), member 7 |
| 1422700_at   | Alox12        | arachidonate 12-lipoxygenase                                               |
| 1436977_at   | Unknown       | Unknown                                                                    |
| 1458914_at   | Eral1         | Era (G-protein)-like 1 (E. coli)                                           |
| 1456619_at   | Liph          | lipase, member H                                                           |
| 1431941_at   | Slc35b4       | solute carrier family 35, member B4                                        |
| 1445999_at   | D19Ert132e    | DNA segment, Chr 19, ERATO Doi 132, expressed                              |
| 1446564_at   | D18Ert169e    | DNA segment, Chr 18, ERATO Doi 169, expressed                              |
| 1450176_at   | Ern1          | endoplasmic reticulum (ER) to nucleus signalling 1                         |
| 1441812_at   | Cyp2u1        | cytochrome P450, family 2, subfamily u, polypeptide 1                      |
| 1432275_at   | Ikbkb         | inhibitor of kappaB kinase beta                                            |
| 1441414_at   | Sfi1          | Sfi1 homolog, spindle assembly associated (yeast)                          |
| 1447045_at   | Unknown       | Unknown                                                                    |
| 1447328_at   | Unknown       | Unknown                                                                    |
| 1456920_at   | Unknown       | Unknown                                                                    |
| 1427771_x_at | Itgb1         | integrin beta 1 (fibronectin receptor beta)                                |
| 1431567_at   | 1700018A04Rik | RIKEN cDNA 1700018A04 gene                                                 |
| 1435782_at   | Gm12617       | Uba52 pseudogene                                                           |
| 1420152_at   | Unknown       | Unknown                                                                    |
| 1419699_at   | Scgb3a1       | secretoglobulin, family 3A, member 1                                       |
| 1440078_at   | Brd4          | bromodomain containing 4                                                   |
| 1425678_a_at | Snrk          | SNF related kinase                                                         |
| 1445403_at   | Unknown       | Unknown                                                                    |
| 1435736_x_at | Ift27         | intraflagellar transport 27 homolog (Chlamydomonas)                        |
| 1425915_at   | Slc26a8       | solute carrier family 26, member 8                                         |
| 1432253_at   | 4921523P09Rik | RIKEN cDNA 4921523P09 gene                                                 |
| 1446184_at   | Unknown       | Unknown                                                                    |
| 1442776_at   | Unknown       | Unknown                                                                    |
| 1446807_at   | Usp8          | ubiquitin specific peptidase 8                                             |
| 1445006_at   | Unknown       | Unknown                                                                    |
| 1454117_at   | 5330439B14Rik | RIKEN cDNA 5330439B14 gene                                                 |
| 1421247_at   | Pax9          | paired box gene 9                                                          |
| 1444442_at   | Oraov1        | oral cancer overexpressed 1                                                |
| 1426003_at   | Ntrk3         | neurotrophic tyrosine kinase, receptor, type 3                             |
| 1432551_at   | 1700031F10Rik | RIKEN cDNA 1700031F10 gene                                                 |
| 1444912_at   | Unknown       | Unknown                                                                    |
| 1447273_x_at | Atp10a        | ATPase, class V, type 10A                                                  |

|       |       |       |       |          |       |       |          |
|-------|-------|-------|-------|----------|-------|-------|----------|
| -0.63 | 2.82  | -0.52 | -4.64 | 0.007282 | -0.75 | -6.71 | 2.83E-04 |
| -0.63 | 4.31  | -0.53 | -4.93 | 0.004708 | -0.73 | -6.76 | 2.62E-04 |
| -0.63 | 3.34  | -0.64 | -5.20 | 0.003228 | -0.62 | -5.04 | 0.003073 |
| -0.63 | 3.00  | -0.67 | -4.92 | 4.77E-03 | -0.59 | -4.36 | 0.008373 |
| -0.63 | 3.38  | -0.66 | -4.80 | 0.005744 | -0.60 | -4.34 | 8.61E-03 |
| -0.63 | 5.99  | -0.52 | -5.53 | 0.002033 | -0.73 | -7.76 | 7.72E-05 |
| -0.62 | 5.34  | -0.62 | -4.73 | 6.34E-03 | -0.63 | -4.81 | 4.27E-03 |
| -0.62 | 10.64 | -0.61 | -4.85 | 0.00523  | -0.63 | -5.02 | 3.15E-03 |
| -0.62 | 5.12  | -0.57 | -5.29 | 0.002859 | -0.67 | -6.29 | 5.14E-04 |
| -0.62 | 3.58  | -0.60 | -4.54 | 0.008372 | -0.64 | -4.86 | 0.003935 |
| -0.62 | 4.72  | -0.66 | -5.80 | 0.001459 | -0.58 | -5.10 | 0.002809 |
| -0.62 | 3.52  | -0.57 | -5.65 | 1.74E-03 | -0.66 | -6.50 | 3.83E-04 |
| -0.61 | 3.24  | -0.76 | -7.31 | 0.0002   | -0.46 | -4.45 | 7.35E-03 |
| -0.61 | 8.38  | -0.74 | -7.25 | 0.000215 | -0.49 | -4.76 | 4.60E-03 |
| -0.61 | 8.23  | -0.61 | -4.68 | 6.83E-03 | -0.61 | -4.73 | 4.81E-03 |
| -0.61 | 5.43  | -0.55 | -5.72 | 0.001596 | -0.67 | -6.95 | 2.10E-04 |
| -0.61 | 4.55  | -0.57 | -4.60 | 0.007784 | -0.65 | -5.22 | 0.002341 |
| -0.61 | 12.04 | -0.59 | -5.83 | 0.001415 | -0.62 | -6.18 | 0.000589 |
| -0.60 | 5.92  | -0.61 | -5.06 | 0.003896 | -0.60 | -5.00 | 3.27E-03 |
| -0.60 | 5.51  | -0.65 | -5.44 | 2.30E-03 | -0.55 | -4.62 | 5.71E-03 |
| -0.60 | 4.07  | -0.52 | -4.51 | 0.008762 | -0.68 | -5.82 | 9.79E-04 |
| -0.60 | 4.32  | -0.59 | -4.70 | 0.006664 | -0.61 | -4.89 | 3.80E-03 |
| -0.60 | 8.66  | -0.56 | -4.93 | 4.71E-03 | -0.64 | -5.66 | 1.24E-03 |
| -0.60 | 3.69  | -0.55 | -4.44 | 0.009699 | -0.65 | -5.22 | 0.002341 |
| -0.60 | 5.06  | -0.57 | -4.74 | 0.006238 | -0.62 | -5.14 | 0.002647 |
| -0.59 | 2.96  | -0.48 | -4.82 | 0.005555 | -0.70 | -6.95 | 2.10E-04 |
| -0.59 | 3.05  | -0.63 | -4.87 | 0.005089 | -0.55 | -4.27 | 9.69E-03 |
| -0.59 | 4.13  | -0.54 | -5.66 | 1.73E-03 | -0.64 | -6.69 | 2.89E-04 |
| -0.59 | 4.85  | -0.60 | -5.11 | 0.00365  | -0.58 | -5.01 | 3.23E-03 |
| -0.59 | 2.86  | -0.61 | -4.74 | 0.006295 | -0.57 | -4.47 | 7.09E-03 |
| -0.59 | 3.50  | -0.62 | -5.70 | 1.65E-03 | -0.56 | -5.11 | 0.002779 |
| -0.58 | 5.10  | -0.66 | -5.78 | 0.001499 | -0.51 | -4.53 | 0.006431 |
| -0.58 | 3.26  | -0.62 | -5.88 | 0.001328 | -0.54 | -5.15 | 2.61E-03 |
| -0.58 | 3.38  | -0.43 | -4.89 | 0.004931 | -0.73 | -8.26 | 4.16E-05 |
| -0.57 | 4.77  | -0.55 | -5.06 | 0.003896 | -0.59 | -5.42 | 1.74E-03 |
| -0.57 | 4.15  | -0.62 | -6.46 | 6.05E-04 | -0.52 | -5.46 | 1.66E-03 |
| -0.57 | 4.20  | -0.65 | -5.82 | 0.00143  | -0.49 | -4.45 | 7.35E-03 |
| -0.57 | 5.32  | -0.54 | -4.71 | 0.006507 | -0.60 | -5.20 | 0.002421 |
| -0.57 | 2.39  | -0.62 | -5.82 | 1.42E-03 | -0.51 | -4.81 | 0.004272 |
| -0.56 | 4.66  | -0.51 | -4.60 | 0.00786  | -0.62 | -5.61 | 1.33E-03 |
| -0.56 | 4.48  | -0.55 | -5.48 | 0.002171 | -0.58 | -5.75 | 1.09E-03 |
| -0.56 | 4.16  | -0.55 | -4.44 | 0.009699 | -0.57 | -4.60 | 5.82E-03 |
| -0.56 | 2.95  | -0.50 | -4.48 | 0.009099 | -0.62 | -5.50 | 1.56E-03 |
| -0.56 | 7.07  | -0.57 | -5.08 | 3.80E-03 | -0.55 | -4.97 | 3.39E-03 |
| -0.56 | 3.20  | -0.61 | -5.25 | 0.002971 | -0.50 | -4.31 | 0.009102 |
| -0.56 | 4.80  | -0.61 | -5.75 | 0.001543 | -0.50 | -4.74 | 0.004803 |
| -0.56 | 3.54  | -0.53 | -4.79 | 5.78E-03 | -0.59 | -5.33 | 1.98E-03 |
| -0.55 | 8.79  | -0.54 | -4.50 | 0.008946 | -0.56 | -4.67 | 5.30E-03 |
| -0.54 | 3.87  | -0.56 | -5.02 | 0.004158 | -0.53 | -4.78 | 4.50E-03 |
| -0.54 | 10.53 | -0.54 | -4.71 | 0.006507 | -0.55 | -4.83 | 4.13E-03 |
| -0.54 | 5.78  | -0.54 | -4.62 | 0.007493 | -0.54 | -4.62 | 5.69E-03 |
| -0.54 | 2.81  | -0.51 | -4.74 | 6.29E-03 | -0.57 | -5.21 | 0.002382 |
| -0.54 | 3.07  | -0.51 | -4.42 | 0.009965 | -0.57 | -4.89 | 0.003826 |
| -0.54 | 4.89  | -0.51 | -4.58 | 0.008044 | -0.56 | -4.95 | 3.49E-03 |
| -0.54 | 3.85  | -0.50 | -4.49 | 8.98E-03 | -0.58 | -5.22 | 2.34E-03 |
| -0.53 | 3.31  | -0.61 | -6.12 | 0.000969 | -0.45 | -4.46 | 7.13E-03 |
| -0.53 | 3.75  | -0.60 | -5.82 | 0.00142  | -0.46 | -4.53 | 6.41E-03 |
| -0.53 | 5.69  | -0.53 | -4.48 | 0.009087 | -0.52 | -4.38 | 8.08E-03 |
| -0.52 | 4.67  | -0.48 | -4.49 | 0.009019 | -0.56 | -5.32 | 0.002036 |
| -0.50 | 4.15  | -0.47 | -5.46 | 2.22E-03 | -0.53 | -6.21 | 0.000567 |
| -0.49 | 5.12  | -0.48 | -4.59 | 0.00786  | -0.50 | -4.75 | 4.67E-03 |
| -0.48 | 4.95  | -0.48 | -4.57 | 0.008115 | -0.48 | -4.60 | 5.85E-03 |
| -0.48 | 3.17  | -0.50 | -4.78 | 5.88E-03 | -0.46 | -4.40 | 7.88E-03 |

|            |               |                                                          |
|------------|---------------|----------------------------------------------------------|
| 1445928_at | March6        | membrane-associated ring finger (C3HC4) 6                |
| 1443056_at | RIKEN...      | RIKEN cDNA A230006123 gene                               |
| 1433691_at | Ppp1r3c       | protein phosphatase 1, regulatory (inhibitor) subunit 3C |
| 1417789_at | Ccl11         | chemokine (C-C motif) ligand 11                          |
| 1433010_at | 5530400N10Rik | RIKEN cDNA 5530400N10 gene                               |
| 1449332_at | Fhl5          | four and a half LIM domains 5                            |
| 1428958_at | Paqr8         | progesterin and adipoQ receptor family member VIII       |
| 1440580_at | Efr3b         | EFR3 homolog B (S. cerevisiae)                           |

|       |       |       |       |          |       |       |          |
|-------|-------|-------|-------|----------|-------|-------|----------|
| -0.48 | 4.80  | -0.49 | -4.89 | 0.004926 | -0.47 | -4.64 | 5.57E-03 |
| -0.47 | 2.56  | -0.48 | -4.92 | 0.004772 | -0.45 | -4.62 | 5.69E-03 |
| -0.47 | 11.42 | -0.46 | -5.48 | 0.002172 | -0.48 | -5.69 | 0.001174 |
| -0.47 | 3.55  | -0.46 | -4.62 | 0.007604 | -0.47 | -4.72 | 0.00494  |
| -0.45 | 3.58  | -0.48 | -4.92 | 4.77E-03 | -0.42 | -4.30 | 9.11E-03 |
| -0.43 | 4.29  | -0.45 | -5.38 | 0.002509 | -0.42 | -5.07 | 2.93E-03 |
| -0.43 | 11.17 | -0.41 | -4.74 | 0.006295 | -0.44 | -5.15 | 2.61E-03 |
| -0.42 | 5.15  | -0.41 | -4.64 | 7.30E-03 | -0.42 | -4.75 | 4.72E-03 |
