# Supplementary material for: Effects of sleep and wake on astrocytes: clues from molecular and ultrastructural studies
Source: PubMed Central journal article supplement (PMC4548305; doi:10.1186/s12915-015-0176-7), 2015-08-25
Supplement: 12915_2015_176_MOESM5_ESM.pdf [file 12915_2015_176_MOESM5_ESM.pdf]

Table 5. Functional clusters for sleep genes

| <b>GO:0032502~ development, developmental process</b> |          | <b>GO:0005856~ cytoskeleton</b> |        | <b>GO:0044249~ cellular biosynthetic process</b> |               | <b>GO:0003700~ transcription factor activity</b> |        |
|-------------------------------------------------------|----------|---------------------------------|--------|--------------------------------------------------|---------------|--------------------------------------------------|--------|
| 1426230_AT                                            | sphk2    | 1442361_AT                      | park2  | 1438211_S_AT                                     | dbp           | 1438211_S_AT                                     | dbp    |
| 1439193_AT                                            | prrxl1   | 1434588_X_AT                    | tbca   | 1426230_AT                                       | sphk2         | 1439193_AT                                       | prrxl1 |
| 1429905_AT                                            | lhx9     | 1419833_S_AT                    | arap3  | 1448470_AT                                       | fbp1          | 1429905_AT                                       | lhx9   |
| 1448975_S_AT                                          | ren1     | 1450496_A_AT                    | ska1   | 1439193_AT                                       | prrxl1        | 1420389_AT                                       | pax3   |
| 1420389_AT                                            | pax3     | 1415779_S_AT                    | actg1  | 1446617_AT                                       | st8sia4       | 1418174_AT                                       | dbp    |
| 1427018_AT                                            | tsnaxip1 | 1449178_AT                      | pdlim3 | 1420389_AT                                       | pax3          | 1424233_AT                                       | meox2  |
| 1415779_S_AT                                          | actg1    |                                 |        | 1418174_AT                                       | dbp           | 1444596_AT                                       | pax7   |
| 1449178_AT                                            | pdlim3   |                                 |        | 1432170_AT                                       | tsfm          |                                                  |        |
| 1424233_AT                                            | meox2    |                                 |        | 1428604_AT                                       | 2610305d13rik |                                                  |        |
| 1419626_AT                                            | adam25   |                                 |        | 1460490_AT                                       | mrpl15        |                                                  |        |
| 1444596_AT                                            | pax7     |                                 |        | 1457640_X_AT                                     | pigs          |                                                  |        |
|                                                       |          |                                 |        | 1444596_AT                                       | pax7          |                                                  |        |

| <b>GO:0043229~ intracellular organelle</b> |               | <b>GO:0043234~ protein complex</b> |        | <b>GO:0050794~ regulation of cellular process</b> |               |
|--------------------------------------------|---------------|------------------------------------|--------|---------------------------------------------------|---------------|
| 1442361_AT                                 | park2         | 1442361_AT                         | park2  | 1442361_AT                                        | park2         |
| 1425008_A_AT                               | ifi203        | 1434588_X_AT                       | tbca   | 1450810_AT                                        | fshr          |
| 1438211_S_AT                               | dbp           | 1450496_A_AT                       | ska1   | 1427327_AT                                        | pilra         |
| 1417700_AT                                 | rab38         | 1420389_AT                         | pax3   | 1438211_S_AT                                      | dbp           |
| 1450496_A_AT                               | ska1          | 1440054_AT                         | pik3ca | 1417700_AT                                        | rab38         |
| 1419833_S_AT                               | arap3         | 1415779_S_AT                       | actg1  | 1450494_X_AT                                      | ceacam1       |
| 1446617_AT                                 | st8sia4       | 1444596_AT                         | pax7   | 1423854_A_AT                                      | rasl11b       |
| 1418174_AT                                 | dbp           |                                    |        | 1450496_A_AT                                      | ska1          |
| 1432170_AT                                 | tsfm          |                                    |        | 1419833_S_AT                                      | arap3         |
| 1449178_AT                                 | pdlim3        |                                    |        | 1448975_S_AT                                      | ren1          |
| 1457640_X_AT                               | pigs          |                                    |        | 1418174_AT                                        | dbp           |
| 1415779_S_AT                               | actg1         |                                    |        | 1424233_AT                                        | meox2         |
| 1460490_AT                                 | mrpl15        |                                    |        | 1444596_AT                                        | pax7          |
| 1424233_AT                                 | meox2         |                                    |        | 1426230_AT                                        | sphk2         |
| 1444596_AT                                 | pax7          |                                    |        | 1439193_AT                                        | prrxl1        |
| 1434588_X_AT                               | tbca          |                                    |        | 1429905_AT                                        | lhx9          |
| 1439193_AT                                 | prrxl1        |                                    |        | 1420389_AT                                        | pax3          |
| 1429905_AT                                 | lhx9          |                                    |        | 1440054_AT                                        | pik3ca        |
| 1420389_AT                                 | pax3          |                                    |        | 1428604_AT                                        | 2610305d13rik |
| 1428604_AT                                 | 2610305d13rik |                                    |        |                                                   |               |
| 1446274_AT                                 | slc16a1       |                                    |        |                                                   |               |
| 1416332_AT                                 | cirbp         |                                    |        |                                                   |               |
