# Supplementary material for: Effects of sleep and wake on astrocytes: clues from molecular and ultrastructural studies
Source: PubMed Central journal article supplement (PMC4548305; doi:10.1186/s12915-015-0176-7), 2015-08-25
Supplement: 12915_2015_176_MOESM6_ESM.pdf [file 12915_2015_176_MOESM6_ESM.pdf]

Table 6. Functional clusters for wake genes

| GO:0008152~metabolic process |               | GO:0017076~ purine nucleotide binding |               | GO:0048856~ anatomical structure development |          | GO:0031323~ regulation of cellular metabolic process |               |
|------------------------------|---------------|---------------------------------------|---------------|----------------------------------------------|----------|------------------------------------------------------|---------------|
| 1451739_AT                   | klf5          | 1418614_AT                            | kcnj1         | 1445908_AT                                   | EIF2B5   | 1445908_AT                                           | EIF2B5        |
| 1458387_AT                   | PTDSS2        | 1419766_AT                            | sik1          | 1451739_AT                                   | klf5     | 1451739_AT                                           | klf5          |
| 1443625_AT                   | naa40         | 1447964_AT                            | ttl           | 1418687_AT                                   | arc      | 1418099_AT                                           | tnfrsf1b      |
| 1446807_AT                   | usp8          | 1438099_AT                            | trio          | 1427683_AT                                   | egr2     | 1427683_AT                                           | egr2          |
| 1427683_AT                   | egr2          | 1449114_AT                            | stk3          | 1447964_AT                                   | ttl      | 1419410_AT                                           | batf          |
| 1427433_S_AT                 | HOXA3         | 1449819_AT                            | dmc1          | 1427433_S_AT                                 | HOXA3    | 1427433_S_AT                                         | HOXA3         |
| 1418322_AT                   | crem          | 1429319_AT                            | rhoh          | 1449819_AT                                   | dmc1     | 1418322_AT                                           | crem          |
| 1421247_AT                   | pax9          | 1445540_AT                            | dnm3          | 1421247_AT                                   | pax9     | 1419654_AT                                           | tle3          |
| 1428634_AT                   | twistnb       | 1433584_AT                            | tuba1a        | 1429319_AT                                   | rhoh     | 1416812_AT                                           | tia1          |
| 1434557_AT                   | hip1          | 1420527_S_AT                          | tcp10         | 1435782_AT                                   | rps27a   | 1421247_AT                                           | pax9          |
| 1417542_AT                   | rps6ka2       | 1443235_AT                            | EIF2AK4       | 1438542_AT                                   | TRP53    | 1443235_AT                                           | EIF2AK4       |
| 1457956_AT                   | CAMTA1        | 1438542_AT                            | trp53         | 1444705_AT                                   | app      | 1434557_AT                                           | hip1          |
| 1457984_AT                   | crh           | 1417542_AT                            | rps6ka2       | 1419762_AT                                   | ubd      | 1438542_AT                                           | trp53         |
| 1430408_AT                   | CACNA1A       | 1431718_AT                            | kif15         | 1457984_AT                                   | crh      | 1457956_AT                                           | CAMTA1        |
| 1439613_AT                   | ADCY10        | 1426063_A_AT                          | gem           | 1430408_AT                                   | CACNA1A  | 1444705_AT                                           | app           |
| 1447273_X_AT                 | atp10a        | 1439613_AT                            | ADCY10        | 1423100_AT                                   | fos      | 1430408_AT                                           | CACNA1A       |
| 1426429_AT                   | thap7         | 1447273_X_AT                          | atp10a        | 1450256_AT                                   | cer1     | 1423100_AT                                           | fos           |
| 1416505_AT                   | nr4a1         | 1425678_A_AT                          | snrk          | 1448804_AT                                   | CYP11A1  | 1441454_AT                                           | zfx3          |
| 1425678_A_AT                 | snrk          | 1422869_AT                            | merck         | 1417394_AT                                   | klf4     | 1426429_AT                                           | thap7         |
| 1445734_AT                   | tdh           | 1417431_A_AT                          | sphk2         | 1417431_A_AT                                 | sphk2    | 1434618_AT                                           | crebzf        |
| 1458361_AT                   | DCIRE1C       | 1450176_AT                            | ern1          | 1458361_AT                                   | DCIRE1C  | 1440959_S_AT                                         | mynn          |
| 1452349_X_AT                 | IFI205        | 1434525_AT                            | pkn3          | 1427771_X_AT                                 | ITGB1    | 1416505_AT                                           | nr4a1         |
| 1437954_AT                   | 2410016o06rik | 1432623_AT                            | supv3l1       | 1417789_AT                                   | ccl11    | 1456846_AT                                           | zbtb42        |
| 1434525_AT                   | pkn3          | 1459956_AT                            | dock10        | 1440748_AT                                   | scarf1   | 1458582_AT                                           | lin54         |
| 1417950_A_AT                 | apoa2         | 1417214_AT                            | rab27b        | 1429777_AT                                   | dnajb6   | 1417394_AT                                           | klf4          |
| 1438308_AT                   | agbl4         | 1435736_X_AT                          | rabl4         | 1454906_AT                                   | rarb     | 1417431_A_AT                                         | sphk2         |
| 1449568_AT                   | klb           | 1452155_A_AT                          | ddx17         | 1435998_AT                                   | CCNB1IP1 | 1437954_AT                                           | 2410016o06rik |
| 1441812_AT                   | CYP2U1        | 1427126_AT                            | hspa1l        | 1418220_AT                                   | foxf2    | 1452349_X_AT                                         | IFI205        |
| 1452344_AT                   | synj2         | 1423026_AT                            | rad51c        | 1421187_AT                                   | CCR2     | 1450176_AT                                           | ern1          |
| 1425883_AT                   | smg6          | 1443115_AT                            | tgfb2         | 1443115_AT                                   | tgfb2    | 1417950_A_AT                                         | apoa2         |
| 1454906_AT                   | rarb          | 1459823_AT                            | ehd2          | 1435663_AT                                   | esr1     | 1458333_X_AT                                         | utf1          |
| 1418220_AT                   | foxf2         | 1427084_A_AT                          | map4k5        | 1441397_AT                                   | pard3    | 1429777_AT                                           | dnajb6        |
| 1423026_AT                   | rad51c        | 1427127_X_AT                          | hspa1l        | 1421080_AT                                   | nr4a3    | 1454906_AT                                           | rarb          |
| 1427126_AT                   | hspa1l        | 1445753_AT                            | aox3l1        | 1448397_AT                                   | gjb6     | 1441439_AT                                           | ucn3          |
| 1443115_AT                   | tgfb2         | 1419981_AT                            | riok3         | 1445886_AT                                   | elk3     | 1418220_AT                                           | foxf2         |
| 1427127_X_AT                 | hspa1l        | 1427836_AT                            | 0610007p08rik | 1416067_AT                                   | ifrd1    | 1443115_AT                                           | tgfb2         |
| 1419981_AT                   | riok3         | 1440943_AT                            | b230208h17rik | 1427454_AT                                   | hoxc6    | 1435663_AT                                           | esr1          |
| 1441639_AT                   | zcchc8        | 1439930_AT                            | smarca2       | 1451711_AT                                   | wnt9b    | 1445669_AT                                           | spry4         |
| 1458363_AT                   | zdhhc17       | 1460212_AT                            | gnat1         | 1450288_AT                                   | cdh6     | 1447383_AT                                           | zfp810        |
| 1442085_AT                   | whsc1l1       | 1455721_AT                            | gspt2         | 1460212_AT                                   | gnat1    | 1420991_AT                                           | ankrd1        |
| 1427836_AT                   | 0610007p08rik | 1442911_AT                            | riok2         | 1419563_AT                                   | birc6    | 1446684_AT                                           | ralgapa1      |
| 1421080_AT                   | nr4a3         | 1432275_AT                            | ikkb          | 1422274_AT                                   | gja8     | 1442085_AT                                           | whsc1l1       |
| 1418936_AT                   | maff          | 1439318_AT                            | mast4         | 1441247_AT                                   | inpp5j   | 1421080_AT                                           | nr4a3         |
| 1443202_AT                   | cyb5b         | 1445339_AT                            | cnga4         | 1446350_AT                                   | itga4    | 1418936_AT                                           | maff          |
| 1459549_AT                   | dph5          | 1426003_AT                            | ntrk3         | 1450749_A_AT                                 | nr4a2    | 1445886_AT                                           | elk3          |
| 1430819_AT                   | naaa          | 1422978_AT                            | cybb          | 1417679_AT                                   | gfi1     | 1442446_AT                                           | zfp523        |
| 1445886_AT                   | elk3          | 1447728_X_AT                          | hspa9         | 1421532_AT                                   | rxfp2    | 1439136_AT                                           | ssbp3         |
| 1448539_A_AT                 | acy3          | 1458914_AT                            | eral1         | 1426003_AT                                   | ntrk3    | 1437882_S_AT                                         | 6330416l07rik |
| 1456619_AT                   | liph          | 1456832_AT                            | atrx          | 1416916_AT                                   | elf3     | 1415810_AT                                           | uhrf1         |
| 1419024_AT                   | ptp4a1        | 1460029_AT                            | gtppb5        | 1456832_AT                                   | atrx     | 1427454_AT                                           | hoxc6         |
| 1421406_AT                   | entpd7        | 1439386_X_AT                          | mat2a         | 1430086_AT                                   | chrna9   | 1456313_X_AT                                         | mrpl28        |
| 1437882_S_AT                 | 6330416l07rik | 1417924_AT                            | pak3          | 1421627_AT                                   | evx1     | 1439930_AT                                           | smarca2       |
| 1439136_AT                   | ssbp3         |                                       |               |                                              |          | 1416814_AT                                           | tia1          |
| 1441199_AT                   | ptprm         |                                       |               |                                              |          | 1456771_AT                                           | zer1          |
| 1415810_AT                   | uhrf1         |                                       |               |                                              |          | 1441247_AT                                           | inpp5j        |
| 1419563_AT                   | birc6         |                                       |               |                                              |          | 1432275_AT                                           | ikkb          |

|              |         |              |         |
|--------------|---------|--------------|---------|
| 1442911_AT   | riok2   | 1450749_A_AT | nr4a2   |
| 1442681_AT   | tsen2   | 1417679_AT   | gfi1    |
| 1432275_AT   | ikbkb   | 1421532_AT   | rxfp2   |
| 1422978_AT   | cybb    | 1443525_AT   | dbx2    |
| 1416916_AT   | elf3    | 1441742_AT   | kcnh5   |
| 1436090_AT   | enpp6   | 1416916_AT   | elf3    |
| 1456832_AT   | atrx    | 1434741_AT   | rreb1   |
| 1439386_X_AT | mat2a   | 1456832_AT   | atrx    |
| 1417924_AT   | pak3    | 1453503_AT   | spink12 |
| 1445908_AT   | eif2b5  | 1433415_AT   | rfx2    |
| 1436654_AT   | gen1    | 1459979_X_AT | zfp68   |
| 1419766_AT   | sik1    | 1421627_AT   | evx1    |
| 1448830_AT   | dusp1   |              |         |
| 1419410_AT   | batf    |              |         |
| 1447964_AT   | ttn     |              |         |
| 1438099_AT   | trio    |              |         |
| 1419654_AT   | tle3    |              |         |
| 1456510_X_AT | higd1c  |              |         |
| 1437326_X_AT | cela3b  |              |         |
| 1421113_AT   | pga5    |              |         |
| 1449114_AT   | stk3    |              |         |
| 1449819_AT   | dmc1    |              |         |
| 1449760_AT   | ddost   |              |         |
| 1443235_AT   | eif2ak4 |              |         |
| 1420527_S_AT | tcp10   |              |         |
| 1452676_A_AT | pnpt1   |              |         |
| 1450061_AT   | enc1    |              |         |
| 1445705_X_AT | dpp8    |              |         |
| 1449332_AT   | fh15    |              |         |
| 1435782_AT   | rps27a  |              |         |
| 1445456_AT   | kcmf1   |              |         |
| 1438542_AT   | trp53   |              |         |
| 1444705_AT   | app     |              |         |
| 1419762_AT   | ubd     |              |         |
| 1439672_AT   | synj1   |              |         |
| 1443491_AT   | ptprk   |              |         |
| 1425918_AT   | egln3   |              |         |
| 1441454_AT   | zhx3    |              |         |
| 1431367_AT   | march1  |              |         |
| 1448804_AT   | cyp11a1 |              |         |
| 1434618_AT   | crebzf  |              |         |
| 1440959_S_AT | mynn    |              |         |
| 1420964_AT   | enc1    |              |         |
| 1433691_AT   | ppp1r3c |              |         |
| 1458582_AT   | lin54   |              |         |
| 1422869_AT   | mertk   |              |         |
| 1417431_A_AT | sphk2   |              |         |
| 1417394_AT   | klf4    |              |         |
| 1450176_AT   | ern1    |              |         |
| 1458333_X_AT | utf1    |              |         |
| 1444507_AT   | usp53   |              |         |
| 1440078_AT   | brd4    |              |         |
| 1427880_AT   | uqcrq   |              |         |
| 1435663_AT   | esr1    |              |         |
| 1427084_A_AT | map4k5  |              |         |
| 1447383_AT   | zfp810  |              |         |
| 1445753_AT   | aox3l1  |              |         |
| 1427345_A_AT | sult1a1 |              |         |
| 1445928_AT   | march6  |              |         |
| 1456070_AT   | ptprg   |              |         |
| 1442446_AT   | zfp523  |              |         |
| 1427652_X_AT | synj2   |              |         |
| 1449685_S_AT | oxsm    |              |         |

1450822\_AT lyz2  
 1427454\_AT hoxc6  
 1419815\_AT mett11d1  
 1429863\_AT lonrf3  
 1429437\_AT prpf40a  
 1456696\_X\_AT rmi1  
 1455721\_AT gspt2  
 1456771\_AT zer1  
 1459337\_AT alg6  
 1439318\_AT mast4  
 1450749\_A\_AT nr4a2  
 1417679\_AT gfi1  
 1447217\_AT uhrf2  
 1422700\_AT alox12  
 1426003\_AT ntrk3  
 1430314\_AT 4933437f05rik  
 1447728\_X\_AT hspa9  
 1434741\_AT rreb1  
 1433415\_AT rfx2  
 1459979\_X\_AT zfp68  
 1432110\_AT 4930402f06rik

| GO:0006897~ endocytosis |        | GO:0016310~ phosphorylation |         | GO:0005525~ GTP binding |           | GO:0043167~ ion binding |         |
|-------------------------|--------|-----------------------------|---------|-------------------------|-----------|-------------------------|---------|
| 1418687_AT              | arc    | 1419766_AT                  | sik1    | 1440943_AT              | b230208h1 | 1451739_AT              | klf5    |
| 1434557_AT              | hip1   | 1443115_AT                  | tgfbr2  | 1459823_AT              | ehd2      | 1436654_AT              | gen1    |
| 1443115_AT              | tgfbr2 | 1438099_AT                  | trio    | 1460212_AT              | gnat1     | 1418614_AT              | kcnj1   |
| 1459823_AT              | ehd2   | 1427084_A_AT                | map4k5  | 1455721_AT              | gspt2     | 1419766_AT              | sik1    |
| 1444705_AT              | app    | 1419981_AT                  | riok3   | 1429319_AT              | rhoh      | 1427683_AT              | egr2    |
| 1421314_AT              | cttn   | 1449114_AT                  | stk3    | 1445540_AT              | dnm3      | 1447964_AT              | ttl     |
| 1445540_AT              | dnm3   | 1425678_A_AT                | snrk    | 1433584_AT              | tuba1a    | 1449114_AT              | stk3    |
| 1421044_AT              | mrc2   | 1422869_AT                  | mertk   | 1459956_AT              | dock10    | 1449332_AT              | fhl5    |
| 1422869_AT              | mertk  | 1443235_AT                  | eif2ak4 | 1417214_AT              | rab27b    | 1442323_AT              | slc10a7 |
| 1439672_AT              | synj1  | 1420527_S_AT                | tcp10   | 1435736_X_AT            | rabl4     | 1435782_AT              | rps27a  |
|                         |        | 1442911_AT                  | riok2   | 1458914_AT              | eral1     | 1445456_AT              | kcmf1   |
|                         |        | 1439318_AT                  | mast4   | 1460029_AT              | gtpbbp5   | 1438542_AT              | trp53   |
|                         |        | 1432275_AT                  | ikbkb   | 1426063_A_AT            | gem       | 1417542_AT              | rps6ka2 |
|                         |        | 1450176_AT                  | ern1    |                         |           | 1447668_X_AT            | efemp2  |
|                         |        | 1434525_AT                  | pkn3    |                         |           | 1427306_AT              | ryr1    |
|                         |        | 1417542_AT                  | rps6ka2 |                         |           | 1433930_AT              | hpse    |
|                         |        | 1444705_AT                  | app     |                         |           | 1444705_AT              | app     |
|                         |        | 1426003_AT                  | ntrk3   |                         |           | 1455261_AT              | luc7l   |
|                         |        | 1440078_AT                  | brd4    |                         |           | 1421253_AT              | nrap    |
|                         |        | 1417924_AT                  | pak3    |                         |           | 1430408_AT              | cacna1a |
|                         |        |                             |         |                         |           | 1439613_AT              | adcy10  |
|                         |        |                             |         |                         |           | 1447273_X_AT            | atp10a  |
|                         |        |                             |         |                         |           | 1425918_AT              | egln3   |
|                         |        |                             |         |                         |           | 1440828_X_AT            | phf7    |
|                         |        |                             |         |                         |           | 1441454_AT              | zhx3    |
|                         |        |                             |         |                         |           | 1426429_AT              | thap7   |
|                         |        |                             |         |                         |           | 1453424_AT              | fyco1   |
|                         |        |                             |         |                         |           | 1431367_AT              | march1  |
|                         |        |                             |         |                         |           | 1448804_AT              | cyp11a1 |
|                         |        |                             |         |                         |           | 1416505_AT              | nr4a1   |
|                         |        |                             |         |                         |           | 1440959_S_AT            | mynn    |
|                         |        |                             |         |                         |           | 1456846_AT              | zbtb42  |
|                         |        |                             |         |                         |           | 1431305_AT              | mcoln1  |
|                         |        |                             |         |                         |           | 1425678_A_AT            | snrk    |
|                         |        |                             |         |                         |           | 1447010_AT              | zfp609  |
|                         |        |                             |         |                         |           | 1437091_AT              | accn4   |
|                         |        |                             |         |                         |           | 1417394_AT              | klf4    |

|              |               |
|--------------|---------------|
| 1450176_AT   | ern1          |
| 1458361_AT   | dclre1c       |
| 1438308_AT   | agbl4         |
| 1441812_AT   | cyp2u1        |
| 1449568_AT   | klb           |
| 1425883_AT   | smg6          |
| 1454906_AT   | rarb          |
| 1450645_AT   | mt4           |
| 1443115_AT   | tgfbr2        |
| 1435663_AT   | esr1          |
| 1459823_AT   | ehd2          |
| 1447383_AT   | zfp810        |
| 1445753_AT   | aox3l1        |
| 1441639_AT   | zcchc8        |
| 1445928_AT   | march6        |
| 1458363_AT   | zdhhc17       |
| 1442085_AT   | whsc1l1       |
| 1421080_AT   | nr4a3         |
| 1457842_AT   | zfp292        |
| 1443202_AT   | cyb5b         |
| 1418475_AT   | scnn1b        |
| 1435560_AT   | itgal         |
| 1442446_AT   | zfp523        |
| 1448539_A_AT | acy3          |
| 1421406_AT   | entpd7        |
| 1437882_S_AT | 6330416l07rik |
| 1415810_AT   | uhrf1         |
| 1419815_AT   | mett11d1      |
| 1450288_AT   | cdh6          |
| 1429863_AT   | lonrf3        |
| 1439318_AT   | mast4         |
| 1446350_AT   | itga4         |
| 1450749_A_AT | nr4a2         |
| 1417679_AT   | gfi1          |
| 1447217_AT   | uhrf2         |
| 1422700_AT   | alox12        |
| 1432840_AT   | galnt11       |
| 1441742_AT   | kcnh5         |
| 1422978_AT   | cybb          |
| 1434741_AT   | rreb1         |
| 1456832_AT   | atrx          |
| 1459979_X_AT | zfp68         |
| 1421044_AT   | mrc2          |
| 1439386_X_AT | mat2a         |
| 1417924_AT   | pak3          |
