# Supplementary material for: Effects of sleep and wake on astrocytes: clues from molecular and ultrastructural studies
Source: PubMed Central journal article supplement (PMC4548305; doi:10.1186/s12915-015-0176-7), 2015-08-25
Supplement: 12915_2015_176_MOESM7_ESM.pdf [file 12915_2015_176_MOESM7_ESM.pdf]

**Table 7. Astrocyte genes upregulated in SD vs W and W vs SD** (fold change>30%, p<0.01)

Note: "X" indicate those genes that were also differentially expressed (up- or downregulated) in the comparison S vs SD, S vs W+SD, and 3m vs 3pm, respectively

| Probeset ID              | Gene Name            | S/SD | S/W-SD | 3m/3pm | LogFC | AveExpr | t      | adj.P.Val |
|--------------------------|----------------------|------|--------|--------|-------|---------|--------|-----------|
| <i>upregulated in SD</i> |                      |      |        |        |       |         |        |           |
| 1435595_at               | 1810011O10Rik        | X    |        |        | -2.90 | 3.90    | -5.89  | 0.0017481 |
| 1456182_x_at             | Mela                 |      |        | X      | -2.73 | 6.32    | -8.81  | 6.40E-05  |
| 1424638_at               | Cdkn1a               | X    |        |        | -2.29 | 8.32    | -6.25  | 0.0010507 |
| 1421679_a_at             | Cdkn1a               | X    |        |        | -2.28 | 9.00    | -5.35  | 0.0037332 |
| 1431501_at               | 1700037C18Rik        | X    |        |        | -2.19 | 5.05    | -5.19  | 0.0046996 |
| <b>1422088_at</b>        | <b>Mycl1</b>         |      |        |        | -2.11 | 5.68    | -5.41  | 0.0034251 |
| 1434856_at               | Ankrd44              | X    |        |        | -2.08 | 4.66    | -6.13  | 0.0012092 |
| 1439632_at               | Unknown              | X    |        |        | -2.06 | 5.65    | -7.42  | 0.0002742 |
| 1439072_at               | Slc1a3               | X    |        |        | -2.03 | 6.43    | -9.22  | 4.30E-05  |
| 1441206_at               | Synpo2               | X    |        |        | -1.99 | 3.25    | -9.88  | 2.38E-05  |
| 1424784_at               | Gm13139              |      |        | X      | -1.97 | 4.96    | -6.14  | 0.0011942 |
| 1438750_at               | Atrx                 |      |        | X      | -1.92 | 3.27    | -6.97  | 0.0004182 |
| <b>1437401_at</b>        | <b>Igf1</b>          |      |        |        | -1.91 | 4.47    | -5.37  | 0.003608  |
| <b>1446011_at</b>        | <b>Unknown</b>       |      |        |        | -1.89 | 4.03    | -4.90  | 0.0073771 |
| <b>1431664_at</b>        | <b>Luc7l</b>         |      |        |        | -1.83 | 3.46    | -7.01  | 0.0004065 |
| <b>1436574_at</b>        | <b>1700029I01Rik</b> |      |        |        | -1.79 | 5.17    | -7.29  | 0.0003099 |
| 1442025_a_at             | Unknown              | X    |        |        | -1.75 | 7.52    | -5.34  | 0.0037687 |
| 1417357_at               | Emd                  | X    |        |        | -1.72 | 10.14   | -10.92 | 1.42E-05  |
| 1440000_at               | E330013P04Rik        | X    |        |        | -1.65 | 4.48    | -6.93  | 0.0004235 |
| 1449143_at               | Rtp4                 |      |        | X      | -1.65 | 5.31    | -7.24  | 0.000328  |
| 1432913_at               | Lrrc52               | X    |        |        | -1.63 | 3.31    | -5.18  | 0.0047935 |
| 1457584_at               | Al848100             | X    |        |        | -1.59 | 3.81    | -5.97  | 0.0015107 |
| 1442026_at               | Unknown              | X    |        |        | -1.58 | 7.83    | -5.48  | 0.0031302 |
| 1444423_at               | Unknown              | X    |        |        | -1.57 | 3.36    | -10.31 | 1.92E-05  |
| 1457871_at               | Colec10              | X    |        |        | -1.57 | 3.49    | -9.80  | 2.40E-05  |
| 1437953_at               | Gpcpd1               | X    |        |        | -1.55 | 3.35    | -6.94  | 0.0004235 |
| 1424157_at               | Ehd2                 | X    |        |        | -1.55 | 6.32    | -7.41  | 0.0002742 |
| 1437085_at               | D630039A03Rik        | X    |        |        | -1.54 | 6.79    | -4.75  | 0.0089279 |
| 1451453_at               | Dapk2                | X    |        |        | -1.54 | 6.08    | -7.07  | 0.0003851 |
| 1453626_at               | 3930402G23Rik        | X    |        |        | -1.54 | 5.09    | -6.44  | 0.0008376 |
| 1451069_at               | Pim3                 | X    |        |        | -1.52 | 8.01    | -7.99  | 0.0001513 |
| 1447061_at               | Hif3a                | X    |        |        | -1.50 | 8.50    | -4.89  | 0.0074405 |
| <b>1429920_at</b>        | <b>Ifltd1</b>        |      |        |        | -1.48 | 5.13    | -4.79  | 0.008561  |
| 1454354_at               | 8030476L19Rik        | X    |        |        | -1.45 | 3.73    | -7.54  | 0.000246  |
| 1455056_at               | Lmo7                 | X    |        |        | -1.41 | 7.56    | -6.37  | 0.0009077 |
| <b>1440670_at</b>        | <b>Unknown</b>       |      |        |        | -1.41 | 5.37    | -5.11  | 0.0051633 |
| 1456101_at               | 4930403N07Rik        | X    |        |        | -1.39 | 3.55    | -14.15 | 1.25E-06  |
| <b>1444866_at</b>        | <b>E230006M18Rik</b> |      |        |        | -1.36 | 4.04    | -5.91  | 0.0016897 |
| 1424524_at               | Dram1                | X    |        |        | -1.36 | 4.56    | -5.12  | 0.0051313 |

|                   |                      |   |  |   |       |       |        |           |
|-------------------|----------------------|---|--|---|-------|-------|--------|-----------|
| 1458677_at        | Entpd5               |   |  | X | -1.35 | 4.66  | -5.80  | 0.0019622 |
| <b>1426412_at</b> | <b>Neurod1</b>       |   |  |   | -1.35 | 5.65  | -5.14  | 0.0050483 |
| <b>1433823_at</b> | <b>Ptpdc1</b>        |   |  |   | -1.34 | 4.32  | -5.16  | 0.0048971 |
| 1435663_at        | Esr1                 | X |  | X | -1.32 | 4.04  | -5.32  | 0.0038809 |
| 1443169_at        | Unknown              | X |  |   | -1.31 | 3.92  | -9.66  | 2.50E-05  |
| 1443918_at        | 2700050L05Rik        | X |  |   | -1.27 | 5.32  | -6.37  | 0.0008992 |
| 1443071_at        | Al839979             | X |  |   | -1.27 | 4.14  | -9.82  | 2.40E-05  |
| 1432438_at        | 4930597L12Rik        | X |  |   | -1.26 | 3.47  | -8.95  | 5.78E-05  |
| 1425281_a_at      | Tsc22d3              | X |  |   | -1.26 | 10.56 | -5.39  | 0.0035145 |
| 1437906_x_at      | Txn1                 | X |  | X | -1.26 | 3.23  | -12.05 | 5.64E-06  |
| 1440482_at        | Vps13a               | X |  |   | -1.26 | 4.32  | -8.16  | 0.0001295 |
| 1426734_at        | Fam43a               | X |  |   | -1.26 | 7.79  | -5.41  | 0.0034251 |
| 1436723_at        | Cenpi                | X |  |   | -1.25 | 2.74  | -5.86  | 0.0018159 |
| 1439376_x_at      | Dmtf1                |   |  | X | -1.25 | 5.06  | -6.40  | 0.0008756 |
| <b>1441241_at</b> | <b>9630013D21Rik</b> |   |  |   | -1.24 | 2.86  | -6.03  | 0.0013946 |
| 1446521_at        | Unknown              | X |  |   | -1.24 | 2.92  | -11.09 | 1.42E-05  |
| 1432712_at        | 4933425M03Rik        | X |  |   | -1.23 | 4.01  | -5.26  | 0.0041782 |
| <b>1430217_at</b> | <b>Lrguk</b>         |   |  |   | -1.23 | 3.28  | -5.68  | 0.0023485 |
| 1439709_at        | Unknown              | X |  | X | -1.23 | 3.15  | -12.90 | 2.83E-06  |
| <b>1428504_at</b> | <b>Xrcc6</b>         |   |  |   | -1.21 | 3.88  | -7.93  | 0.0001635 |
| <b>1437609_at</b> | <b>Ube2u</b>         |   |  |   | -1.20 | 4.10  | -4.68  | 0.0098553 |
| 1441279_at        | C430002E04Rik        | X |  |   | -1.19 | 3.79  | -7.21  | 0.0003341 |
| 1426369_at        | Far1                 | X |  |   | -1.19 | 7.60  | -4.88  | 0.0074683 |
| <b>1434558_at</b> | <b>Wdr47</b>         |   |  |   | -1.19 | 7.96  | -6.95  | 0.0004223 |
| 1432501_at        | 1700092E16Rik        | X |  |   | -1.18 | 4.09  | -8.91  | 5.88E-05  |
| 1448378_at        | Fscn1                | X |  |   | -1.18 | 9.98  | -6.25  | 0.0010507 |
| <b>1423778_at</b> | <b>Usp20</b>         |   |  |   | -1.18 | 5.83  | -5.44  | 0.0032564 |
| 1453778_at        | 2810407C02Rik        | X |  |   | -1.18 | 2.88  | -10.88 | 1.42E-05  |
| 1444400_at        | Rb1                  | X |  |   | -1.18 | 3.36  | -5.34  | 0.0037637 |
| <b>1422012_at</b> | <b>Crhr2</b>         |   |  |   | -1.17 | 4.22  | -6.01  | 0.0014411 |
| 1446253_at        | Unknown              | X |  |   | -1.17 | 4.12  | -7.54  | 0.000246  |
| 1429009_at        | Snrnp70              | X |  |   | -1.16 | 4.47  | -4.76  | 0.0088824 |
| <b>1435266_at</b> | <b>Scai</b>          |   |  |   | -1.15 | 4.05  | -6.15  | 0.0011856 |
| <b>1435706_at</b> | <b>Btbd9</b>         |   |  |   | -1.15 | 6.32  | -5.31  | 0.0039207 |
| 1430069_at        | 4921517L17Rik        | X |  |   | -1.14 | 4.44  | -4.77  | 0.008819  |
| 1425638_at        | Adap2                | X |  |   | -1.14 | 6.65  | -7.00  | 0.0004065 |
| 1443366_at        | Napg                 | X |  |   | -1.14 | 3.88  | -7.41  | 0.0002747 |
| <b>1434376_at</b> | <b>Cd44</b>          |   |  |   | -1.13 | 5.51  | -5.45  | 0.0032345 |
| 1455164_at        | Arhgap31             | X |  |   | -1.13 | 8.05  | -4.69  | 0.0097827 |
| 1421172_at        | Adam12               | X |  |   | -1.13 | 4.90  | -5.83  | 0.0018994 |
| 1431046_at        | Ppfia3               |   |  | X | -1.12 | 6.57  | -9.76  | 2.41E-05  |
| <b>1455275_at</b> | <b>E530001K10Rik</b> |   |  |   | -1.11 | 5.60  | -4.97  | 0.0065815 |
| 1445182_at        | Zfp672               |   |  | X | -1.11 | 3.17  | -7.88  | 0.0001635 |
| 1446655_at        | Scyl3                |   |  | X | -1.11 | 5.54  | -10.15 | 1.94E-05  |
| 1447224_at        | Unknown              |   |  | X | -1.11 | 3.49  | -7.57  | 0.0002404 |
| 1420150_at        | Spsb1                | X |  |   | -1.10 | 8.59  | -4.88  | 0.007506  |
| 1419519_at        | Igf1                 | X |  |   | -1.10 | 4.81  | -4.91  | 0.0071555 |

|                     |                      |   |   |       |      |        |           |
|---------------------|----------------------|---|---|-------|------|--------|-----------|
| 1441578_at          | Ccdc86               | X |   | -1.10 | 5.48 | -5.10  | 0.0052572 |
| <b>1439477_at</b>   | <b>Ube2b</b>         |   |   | -1.10 | 3.31 | -4.70  | 0.0096383 |
| 1453841_at          | 2310050P20Rik        | X | X | -1.09 | 2.80 | -10.28 | 1.92E-05  |
| <b>1445141_at</b>   | <b>Unknown</b>       |   |   | -1.09 | 3.53 | -5.57  | 0.0028064 |
| <b>1429661_at</b>   | <b>Rhobtb3</b>       |   |   | -1.08 | 4.70 | -5.67  | 0.0023793 |
| 1445326_at          | Sdk1                 |   | X | -1.08 | 4.64 | -6.98  | 0.0004123 |
| 1440926_at          | Flt1                 |   | X | -1.07 | 4.08 | -5.37  | 0.0036393 |
| <b>1432601_at</b>   | <b>MI15</b>          |   |   | -1.07 | 3.26 | -4.90  | 0.0072832 |
| <b>1451490_at</b>   | <b>Lyplal1</b>       |   |   | -1.07 | 7.96 | -5.04  | 0.0058868 |
| <b>1450605_at</b>   | <b>Tas2r108</b>      |   |   | -1.06 | 2.98 | -6.98  | 0.0004123 |
| 1449752_at          | Spsb1                | X |   | -1.06 | 9.47 | -4.75  | 0.0089279 |
| 1418494_at          | Ebf2                 | X |   | -1.06 | 4.03 | -4.70  | 0.0096498 |
| 1446679_at          | Unknown              | X |   | -1.05 | 3.14 | -8.11  | 0.0001335 |
| <b>1454392_at</b>   | <b>9230112J17Rik</b> |   |   | -1.05 | 4.34 | -4.76  | 0.0088917 |
| 1458145_at          | Unknown              | X |   | -1.03 | 4.74 | -5.88  | 0.0017563 |
| 1445148_at          | Unknown              | X |   | -1.03 | 4.00 | -8.49  | 9.15E-05  |
| 1431969_at          | 4930402D18Rik        | X |   | -1.02 | 3.40 | -10.21 | 1.92E-05  |
| <b>1423192_at</b>   | <b>Pspc1</b>         |   |   | -1.02 | 8.98 | -5.15  | 0.0049772 |
| 1432115_a_at        | Pign                 | X |   | -1.02 | 6.19 | -7.34  | 0.0003009 |
| 1438793_x_at        | Ergic1               | X | X | -1.02 | 3.24 | -9.90  | 2.38E-05  |
| 1432137_at          | 4933434P08Rik        | X |   | -1.01 | 3.10 | -6.28  | 0.0010026 |
| 1431324_at          | Ecm2                 | X |   | -1.01 | 3.09 | -7.23  | 0.0003293 |
| 1436855_at          | Ptprs                | X |   | -1.00 | 3.00 | -7.79  | 0.0001773 |
| 1432424_at          | 4930505H01Rik        |   | X | -1.00 | 5.53 | -7.23  | 0.0003293 |
| 1441858_at          | Unknown              | X |   | -1.00 | 3.23 | -8.14  | 0.0001298 |
| 1425500_x_at        | Unknown              | X |   | -1.00 | 2.83 | -7.91  | 0.0001635 |
| 1449516_a_at        | Rgs3                 | X |   | -1.00 | 5.95 | -6.43  | 0.0008376 |
| 1450883_a_at        | Cd36                 | X |   | -1.00 | 3.81 | -5.88  | 0.0017662 |
| <b>1439962_at</b>   | <b>2310010J17Rik</b> |   |   | -0.99 | 8.09 | -6.57  | 0.0006747 |
| 1429977_at          | 9030425L15Rik        | X |   | -0.99 | 3.32 | -9.00  | 5.75E-05  |
| <b>1444988_at</b>   | <b>Unknown</b>       |   |   | -0.99 | 3.45 | -6.31  | 0.0009798 |
| <b>1457245_at</b>   | <b>Dirc2</b>         |   |   | -0.99 | 4.23 | -5.04  | 0.0058868 |
| 1449802_x_at        | Rpusd2               | X |   | -0.98 | 2.71 | -4.79  | 0.0085301 |
| <b>1457647_x_at</b> | <b>1600023N17Rik</b> |   |   | -0.98 | 4.69 | -5.55  | 0.002862  |
| 1460079_at          | Ttc5                 | X |   | -0.98 | 4.27 | -5.17  | 0.0047987 |
| <b>1421708_a_at</b> | <b>Stat6</b>         |   |   | -0.98 | 6.40 | -7.24  | 0.000328  |
| <b>1441038_at</b>   | <b>Unknown</b>       |   |   | -0.98 | 3.63 | -6.72  | 0.0005624 |
| 1436776_x_at        | Slc7a4               | X |   | -0.97 | 3.13 | -6.27  | 0.0010202 |
| 1449037_at          | Crem                 | X |   | -0.97 | 8.33 | -6.39  | 0.000891  |
| 1426368_at          | LOC100044115         | X |   | -0.97 | 9.75 | -5.28  | 0.0040629 |
| <b>1459031_at</b>   | <b>Ttll4</b>         |   |   | -0.97 | 5.92 | -5.47  | 0.0031672 |
| 1442544_at          | Igh-6                |   | X | -0.97 | 3.17 | -8.58  | 8.04E-05  |
| <b>1458827_at</b>   | <b>Unknown</b>       |   |   | -0.96 | 4.57 | -5.70  | 0.0022708 |
| 1455520_at          | Ppp2r5c              |   | X | -0.96 | 5.18 | -6.25  | 0.001051  |
| 1447331_at          | Unknown              | X |   | -0.96 | 2.47 | -7.05  | 0.0003933 |
| 1440129_at          | Aurka                | X |   | -0.96 | 3.62 | -6.79  | 0.0005096 |
| 1443508_at          | Dlgap1               | X |   | -0.95 | 3.07 | -8.69  | 7.21E-05  |

|                     |                      |   |   |       |       |        |           |
|---------------------|----------------------|---|---|-------|-------|--------|-----------|
| <b>1434681_at</b>   | <b>4932441K18Rik</b> |   |   | -0.94 | 4.99  | -5.27  | 0.0041069 |
| 1419476_at          | Adamdec1             | X |   | -0.94 | 3.16  | -7.24  | 0.000328  |
| <b>1428458_at</b>   | <b>Pop1</b>          |   |   | -0.94 | 6.26  | -5.48  | 0.0031155 |
| <b>1437100_x_at</b> | <b>Pim3</b>          |   |   | -0.94 | 10.84 | -4.82  | 0.0082431 |
| 1441604_at          | Esd                  | X |   | -0.94 | 3.68  | -6.30  | 0.0009848 |
| 1457271_at          | Cym                  | X |   | -0.93 | 3.72  | -7.88  | 0.0001635 |
| 1458478_at          | 9230110F11Rik        | X |   | -0.93 | 3.27  | -7.53  | 0.0002465 |
| <b>1432878_at</b>   | <b>4930544N03Rik</b> |   |   | -0.93 | 3.44  | -5.98  | 0.0015107 |
| 1418322_at          | Crem                 | X | X | -0.93 | 7.14  | -5.28  | 0.0040552 |
| 1418093_a_at        | Egf                  | X |   | -0.93 | 3.83  | -9.64  | 2.50E-05  |
| <b>1421802_at</b>   | <b>Ear1</b>          |   |   | -0.93 | 3.11  | -6.84  | 0.0004784 |
| 1447269_at          | Fam184b              | X |   | -0.93 | 4.49  | -7.42  | 0.0002742 |
| 1418653_at          | Cyp2c50              | X |   | -0.93 | 3.69  | -7.00  | 0.0004065 |
| 1425906_a_at        | Sema3e               | X |   | -0.92 | 4.58  | -6.04  | 0.0013785 |
| 1427054_s_at        | Abi3bp               |   | X | -0.92 | 3.03  | -4.81  | 0.0082489 |
| 1446764_at          | Unknown              | X |   | -0.92 | 3.50  | -6.57  | 0.0006747 |
| 1437404_at          | Mast4                | X |   | -0.92 | 6.75  | -4.74  | 0.0090922 |
| 1459596_at          | Unknown              | X |   | -0.92 | 4.70  | -10.31 | 1.92E-05  |
| 1429180_at          | Gmpr2                | X |   | -0.92 | 3.76  | -5.88  | 0.0017679 |
| 1433195_at          | 9530006O14Rik        | X |   | -0.91 | 3.72  | -8.31  | 0.0001178 |
| 1433126_at          | 5330422M15Rik        | X |   | -0.91 | 3.82  | -6.43  | 0.0008376 |
| <b>1445952_at</b>   | <b>Unknown</b>       |   |   | -0.91 | 2.62  | -7.17  | 0.0003341 |
| <b>1447789_x_at</b> | <b>Ddx6</b>          |   |   | -0.91 | 3.03  | -7.17  | 0.0003341 |
| 1454762_at          | Xkrx                 |   | X | -0.91 | 5.42  | -6.15  | 0.0011856 |
| <b>1441618_at</b>   | <b>Arhgap29</b>      |   |   | -0.91 | 4.31  | -6.71  | 0.0005677 |
| 1446285_at          | Unknown              | X |   | -0.90 | 3.83  | -7.82  | 0.0001751 |
| <b>1418518_at</b>   | <b>Furin</b>         |   |   | -0.90 | 8.40  | -5.09  | 0.0053255 |
| <b>1426370_at</b>   | <b>Far1</b>          |   |   | -0.90 | 8.36  | -5.23  | 0.0043925 |
| 1444800_at          | Unknown              | X |   | -0.90 | 3.97  | -8.16  | 0.0001295 |
| 1440658_at          | Ammecr1l             |   | X | -0.90 | 3.32  | -5.08  | 0.0054674 |
| 1438596_at          | 1500017E21Rik        | X |   | -0.90 | 2.84  | -5.28  | 0.0040629 |
| 1448086_at          | D1Ertd164e           | X |   | -0.89 | 3.88  | -7.31  | 0.0003076 |
| <b>1460134_at</b>   | <b>9330175E14Rik</b> |   |   | -0.89 | 3.69  | -7.07  | 0.0003851 |
| <b>1444680_at</b>   | <b>Med15</b>         |   |   | -0.89 | 3.97  | -6.35  | 0.0009323 |
| <b>1453878_at</b>   | <b>Ubr2</b>          |   |   | -0.88 | 3.83  | -4.67  | 0.0099941 |
| 1452158_at          | Eprs                 | X |   | -0.88 | 9.50  | -6.78  | 0.0005155 |
| 1435901_at          | Usp40                | X |   | -0.88 | 7.42  | -5.45  | 0.0032345 |
| 1445343_at          | Tmed5                | X | X | -0.88 | 3.87  | -5.56  | 0.0028145 |
| 1457789_at          | Cln3                 |   | X | -0.88 | 3.87  | -5.79  | 0.0019742 |
| 1457258_at          | 1700017L05Rik        | X |   | -0.87 | 4.44  | -7.89  | 0.0001635 |
| 1444849_at          | C76872               | X |   | -0.87 | 3.66  | -6.95  | 0.0004207 |
| <b>1443495_at</b>   | <b>Atp5j2</b>        |   |   | -0.87 | 3.33  | -6.08  | 0.0013035 |
| <b>1420195_at</b>   | <b>Unknown</b>       |   |   | -0.87 | 3.36  | -6.04  | 0.0013785 |
| 1425973_at          | Lyst                 | X |   | -0.86 | 4.11  | -6.28  | 0.0010107 |
| 1444642_at          | Unknown              |   | X | -0.86 | 4.26  | -7.17  | 0.0003341 |
| 1436527_at          | Unknown              | X |   | -0.86 | 5.27  | -4.81  | 0.0082489 |
| 1445238_at          | Unknown              | X |   | -0.86 | 2.92  | -5.90  | 0.0017331 |

|                     |                      |   |   |   |       |       |       |           |
|---------------------|----------------------|---|---|---|-------|-------|-------|-----------|
| 1444757_at          | Unknown              |   |   | X | -0.86 | 3.11  | -6.92 | 0.0004241 |
| 1426713_s_at        | Eprs                 | X |   |   | -0.86 | 9.74  | -7.61 | 0.0002328 |
| 1458033_at          | Ubr1                 | X |   |   | -0.85 | 2.53  | -8.23 | 0.0001263 |
| <b>1444850_at</b>   | <b>Gm12169</b>       |   |   |   | -0.85 | 3.85  | -5.79 | 0.0019803 |
| 1443090_at          | Unknown              | X |   |   | -0.85 | 3.28  | -8.96 | 5.78E-05  |
| <b>1436033_at</b>   | <b>BC031353</b>      |   |   |   | -0.84 | 8.42  | -6.57 | 0.0006747 |
| 1422033_a_at        | Cntf                 |   |   | X | -0.84 | 6.97  | -5.04 | 0.0058794 |
| 1416155_at          | Hmgb3                |   |   | X | -0.84 | 10.01 | -6.12 | 0.0012327 |
| 1426925_at          | Rc3h2                |   |   | X | -0.84 | 2.91  | -5.25 | 0.0042807 |
| 1446172_at          | Unknown              | X |   |   | -0.84 | 3.87  | -6.11 | 0.0012527 |
| 1426371_at          | Far1                 | X |   |   | -0.84 | 7.04  | -4.99 | 0.0063925 |
| 1428048_at          | LOC269472            | X |   |   | -0.84 | 3.07  | -6.67 | 0.0005947 |
| 1456134_x_at        | Yif1a                |   |   | X | -0.83 | 3.51  | -9.59 | 2.59E-05  |
| 1454227_at          | Htati2               | X |   |   | -0.83 | 3.74  | -6.07 | 0.0013035 |
| 1433232_at          | 4933426I03Rik        | X |   |   | -0.83 | 3.06  | -9.52 | 2.79E-05  |
| 1438386_x_at        | Mat2a                | X |   |   | -0.83 | 10.23 | -5.57 | 0.0027851 |
| <b>1452761_a_at</b> | <b>Rbms3</b>         |   |   |   | -0.82 | 3.80  | -5.05 | 0.0058145 |
| 1427541_x_at        | Hmmr                 | X |   |   | -0.82 | 3.72  | -6.55 | 0.0007008 |
| <b>1418196_at</b>   | <b>Tep1</b>          |   |   |   | -0.82 | 6.39  | -5.07 | 0.0055431 |
| 1432564_at          | 1700066C05Rik        | X |   |   | -0.82 | 2.68  | -6.70 | 0.0005724 |
| 1458556_at          | Unknown              |   |   | X | -0.82 | 2.81  | -9.73 | 2.41E-05  |
| 1458803_at          | Slfn9                | X |   |   | -0.82 | 5.07  | -5.37 | 0.003608  |
| 1421469_a_at        | Stat5a               |   |   |   | -0.82 | 7.53  | -5.27 | 0.0041069 |
| 1419766_at          | Sik1                 | X | X |   | -0.81 | 7.88  | -5.34 | 0.0037637 |
| 1419807_at          | D4Ertd335e           |   |   |   | -0.81 | 4.00  | -4.88 | 0.007523  |
| 1421173_at          | Irf4                 |   |   | X | -0.80 | 3.56  | -4.82 | 0.0082489 |
| <b>1440791_x_at</b> | <b>Tcea2</b>         |   |   |   | -0.80 | 5.73  | -5.33 | 0.0037814 |
| <b>1449909_at</b>   | <b>2010005H15Rik</b> |   |   |   | -0.80 | 4.92  | -4.69 | 0.0097814 |
| 1429855_at          | 1700023I07Rik        | X |   |   | -0.80 | 3.55  | -6.32 | 0.0009526 |
| 1438249_at          | Usp7                 | X |   |   | -0.80 | 2.91  | -7.17 | 0.0003341 |
| 1438590_at          | Rapgef3              | X |   |   | -0.80 | 4.62  | -5.85 | 0.0018426 |
| 1440401_at          | Unknown              | X |   |   | -0.80 | 4.00  | -4.90 | 0.0072853 |
| <b>1445543_at</b>   | <b>Zmym5</b>         |   |   |   | -0.79 | 2.51  | -4.77 | 0.008819  |
| 1420109_at          | Unknown              | X |   |   | -0.79 | 3.94  | -6.85 | 0.0004773 |
| 1460417_at          | AB041803             | X |   |   | -0.79 | 4.05  | -7.31 | 0.0003076 |
| <b>1444699_at</b>   | <b>Sf4</b>           |   |   |   | -0.79 | 3.99  | -5.80 | 0.0019622 |
| 1419882_at          | Unknown              | X |   |   | -0.79 | 2.53  | -6.20 | 0.0011126 |
| <b>1445693_at</b>   | <b>Araf</b>          |   |   |   | -0.79 | 3.57  | -4.76 | 0.0089279 |
| 1429086_at          | Gm16136              | X |   |   | -0.78 | 4.36  | -5.52 | 0.0029829 |
| <b>1440023_at</b>   | <b>Pcdh12</b>        |   |   |   | -0.78 | 3.14  | -5.95 | 0.0015634 |
| 1445773_at          | Unknown              | X |   |   | -0.78 | 3.02  | -6.33 | 0.0009485 |
| <b>1459810_at</b>   | <b>1110008F13Rik</b> |   |   |   | -0.78 | 4.21  | -4.95 | 0.0068185 |
| <b>1431767_at</b>   | <b>4930442G15Rik</b> |   |   |   | -0.78 | 4.31  | -5.71 | 0.0022446 |
| 1460093_at          | Unknown              | X |   |   | -0.78 | 3.06  | -6.60 | 0.0006648 |
| <b>1449102_at</b>   | <b>Ebf2</b>          |   |   |   | -0.78 | 2.85  | -5.15 | 0.0049504 |
| <b>1437982_x_at</b> | <b>Cox15</b>         |   |   |   | -0.77 | 7.42  | -4.76 | 0.0088917 |
| <b>1458256_at</b>   | <b>Isy1</b>          |   |   |   | -0.77 | 3.31  | -4.99 | 0.0063343 |

|                     |                      |   |   |   |       |       |       |           |
|---------------------|----------------------|---|---|---|-------|-------|-------|-----------|
| 1424927_at          | Glipr1               | X |   |   | -0.77 | 4.03  | -4.75 | 0.0089279 |
| 1426955_at          | Col18a1              | X |   |   | -0.77 | 5.33  | -4.82 | 0.0082485 |
| 1443335_at          | Unknown              | X |   |   | -0.77 | 3.07  | -7.21 | 0.0003341 |
| 1447285_at          | Unknown              | X |   |   | -0.77 | 3.35  | -4.70 | 0.0096383 |
| 1452157_at          | Eprs                 | X |   |   | -0.77 | 9.41  | -5.48 | 0.0031126 |
| 1455316_x_at        | BC094435             | X |   |   | -0.76 | 11.29 | -5.79 | 0.0019887 |
| 1444043_at          | Unknown              | X |   |   | -0.76 | 3.17  | -5.45 | 0.0032345 |
| <b>1438689_at</b>   | <b>Zfp784</b>        |   |   |   | -0.76 | 8.12  | -5.00 | 0.0063231 |
| 1454577_at          | Cdc20b               | X | X |   | -0.76 | 2.98  | -8.74 | 6.77E-05  |
| 1454262_at          | Fbxw27               |   |   | X | -0.76 | 3.74  | -6.96 | 0.0004203 |
| 1449027_at          | Rhou                 | X |   |   | -0.76 | 11.22 | -4.98 | 0.0064637 |
| 1459025_at          | 1700001J04Rik        | X |   |   | -0.76 | 3.92  | -6.18 | 0.0011424 |
| 1459468_at          | C79743               | X |   |   | -0.75 | 3.64  | -7.30 | 0.0003076 |
| 1432274_at          | 4930543N07Rik        | X |   |   | -0.75 | 3.18  | -5.44 | 0.0032864 |
| <b>1420193_at</b>   | <b>Krt17</b>         |   |   |   | -0.75 | 3.06  | -4.76 | 0.0088917 |
| 1417597_at          | Cd28                 | X |   |   | -0.75 | 2.81  | -7.00 | 0.0004065 |
| 1459352_at          | Unknown              | X |   |   | -0.75 | 3.57  | -7.30 | 0.0003076 |
| 1430428_at          | 2310066F23Rik        | X |   |   | -0.75 | 2.78  | -5.47 | 0.0031342 |
| <b>1418892_at</b>   | <b>Rhoj</b>          |   |   |   | -0.75 | 9.42  | -5.16 | 0.0048628 |
| <b>1422529_s_at</b> | <b>Casq2</b>         |   |   |   | -0.74 | 4.29  | -6.43 | 0.0008376 |
| 1449777_at          | Dus4l                | X |   |   | -0.74 | 4.41  | -7.49 | 0.0002539 |
| 1431888_s_at        | Psg21                | X |   |   | -0.74 | 2.86  | -5.45 | 0.0032345 |
| 1458972_at          | 9330112F22Rik        | X |   |   | -0.74 | 2.87  | -6.43 | 0.0008376 |
| 1456702_x_at        | Mat2a                | X |   |   | -0.74 | 10.10 | -4.74 | 0.0090959 |
| 1430490_at          | Unknown              | X |   |   | -0.74 | 3.37  | -5.53 | 0.0029816 |
| 1432784_at          | 4930556A17Rik        | X |   |   | -0.74 | 3.22  | -5.66 | 0.0024106 |
| 1420164_at          | D7Ertd183e           |   |   | X | -0.74 | 3.48  | -7.11 | 0.0003677 |
| 1450222_x_at        | Klk1b4               | X |   |   | -0.74 | 3.81  | -5.86 | 0.0018156 |
| 1440266_at          | 5830428M24Rik        | X |   |   | -0.74 | 3.78  | -6.58 | 0.0006747 |
| 1432117_at          | 4933422A05Rik        | X |   |   | -0.73 | 3.43  | -6.70 | 0.0005751 |
| 1425559_a_at        | Acsm3                |   |   | X | -0.73 | 6.14  | -5.57 | 0.0027908 |
| 1454126_at          | 0710001A04Rik        | X |   |   | -0.73 | 3.16  | -5.16 | 0.0048628 |
| 1447144_at          | Unknown              | X |   |   | -0.73 | 4.04  | -5.16 | 0.0048628 |
| <b>1430814_at</b>   | <b>Cyp2d40</b>       |   |   |   | -0.73 | 4.03  | -5.44 | 0.0032481 |
| 1450597_at          | Olfcr870             |   |   | X | -0.73 | 3.35  | -6.16 | 0.0011762 |
| 1422140_at          | Gm7609               | X |   |   | -0.72 | 2.49  | -6.36 | 0.0009206 |
| <b>1447757_x_at</b> | <b>Inpp5f</b>        |   |   |   | -0.72 | 6.17  | -6.04 | 0.0013785 |
| 1426847_at          | Sirt4                | X |   |   | -0.72 | 7.01  | -5.15 | 0.0049382 |
| 1424410_at          | Ttc8                 |   |   | X | -0.72 | 8.13  | -5.26 | 0.0041805 |
| <b>1453669_at</b>   | <b>4930578C19Rik</b> |   |   |   | -0.72 | 2.71  | -5.05 | 0.0058109 |
| <b>1441876_x_at</b> | <b>Gm11677</b>       |   |   |   | -0.72 | 4.95  | -5.25 | 0.0042476 |
| <b>1456526_at</b>   | <b>C130034I24Rik</b> |   |   |   | -0.71 | 3.06  | -5.12 | 0.0051633 |
| 1433034_at          | 2310007H11Rik        | X |   |   | -0.71 | 3.81  | -6.98 | 0.0004123 |
| <b>1441865_at</b>   | <b>Unknown</b>       |   |   |   | -0.71 | 3.20  | -5.98 | 0.0015107 |
| 1440398_at          | Unknown              | X |   |   | -0.71 | 3.73  | -5.21 | 0.0045367 |
| 1438489_at          | Smn1                 | X |   |   | -0.71 | 3.76  | -7.43 | 0.0002735 |
| 1459265_at          | Myo19                | X |   |   | -0.71 | 3.81  | -6.47 | 0.0007931 |

|                     |                      |   |   |   |       |       |       |           |
|---------------------|----------------------|---|---|---|-------|-------|-------|-----------|
| <b>1459937_at</b>   | <b>Ass1</b>          |   |   |   | -0.71 | 3.60  | -5.12 | 0.005129  |
| <b>1428297_at</b>   | <b>Map4k2</b>        |   |   |   | -0.71 | 5.58  | -5.69 | 0.0023401 |
| <b>1446648_at</b>   | <b>Unknown</b>       |   |   |   | -0.71 | 2.83  | -5.28 | 0.0040552 |
| <b>1437951_at</b>   | <b>Dis3l2</b>        |   |   |   | -0.71 | 3.42  | -5.98 | 0.0015107 |
| <b>1459782_x_at</b> | <b>Abcc5</b>         |   |   |   | -0.71 | 4.19  | -5.49 | 0.0030659 |
| <b>1455595_at</b>   | <b>Ugt2b36</b>       |   |   |   | -0.70 | 3.34  | -4.87 | 0.0076401 |
| 1429812_at          | 2610002D18Rik        | X |   |   | -0.70 | 4.36  | -6.19 | 0.0011142 |
| 1459932_at          | D8Ertd28e            | X | X |   | -0.70 | 3.28  | -7.31 | 0.0003076 |
| 1423306_at          | 2010002N04Rik        | X |   |   | -0.70 | 10.80 | -4.88 | 0.0075506 |
| <b>1447282_at</b>   | <b>Gng13</b>         |   |   |   | -0.70 | 5.17  | -6.21 | 0.0011041 |
| 1423226_at          | Ms4a1                | X |   |   | -0.69 | 3.13  | -5.83 | 0.0018775 |
| 1440235_at          | Itga10               | X |   |   | -0.69 | 3.13  | -5.15 | 0.0049375 |
| 1430215_at          | 2610020H08Rik        | X |   |   | -0.69 | 4.10  | -4.79 | 0.0085301 |
| <b>1452231_x_at</b> | <b>Mndal</b>         |   |   |   | -0.69 | 2.40  | -4.68 | 0.0099462 |
| 1421556_at          | Serpina3a            | X |   |   | -0.69 | 3.34  | -5.26 | 0.0041889 |
| 1444023_at          | Ank2                 |   | X |   | -0.69 | 2.45  | -5.20 | 0.0045926 |
| 1425782_at          | Plcb1                | X |   |   | -0.69 | 3.16  | -5.88 | 0.0017695 |
| 1431392_at          | 5730596B20Rik        | X |   |   | -0.69 | 3.64  | -7.08 | 0.0003851 |
| 1453695_at          | Vmn1r90              | X |   |   | -0.69 | 4.65  | -6.18 | 0.0011368 |
| 1445931_at          | Unknown              | X |   |   | -0.69 | 3.30  | -5.29 | 0.0040552 |
| <b>1431215_at</b>   | <b>Dnajc6</b>        |   |   |   | -0.68 | 2.77  | -4.71 | 0.0093922 |
| 1449919_at          | Krtap6-2             | X |   |   | -0.68 | 3.92  | -5.72 | 0.0021958 |
| 1436652_at          | 5830418K08Rik        | X |   |   | -0.68 | 2.77  | -5.86 | 0.0018061 |
| 1431819_at          | Unknown              |   | X |   | -0.68 | 5.76  | -4.73 | 0.0092122 |
| 1442693_at          | Trim5                | X |   |   | -0.68 | 2.90  | -6.99 | 0.0004123 |
| 1432683_at          | 5530400K19Rik        | X |   |   | -0.68 | 4.37  | -7.02 | 0.0004065 |
| <b>1445134_at</b>   | <b>Mkl2</b>          |   |   |   | -0.67 | 8.96  | -5.76 | 0.0021038 |
| 1438708_x_at        | Ywhab                | X |   |   | -0.67 | 2.96  | -7.89 | 0.0001635 |
| <b>1442456_at</b>   | <b>Spata5</b>        |   |   |   | -0.67 | 2.69  | -5.64 | 0.0024863 |
| 1445943_at          | Unknown              | X |   |   | -0.67 | 3.24  | -5.48 | 0.0031044 |
| 1432672_at          | 4933407A17Rik        | X | X | X | -0.67 | 3.69  | -5.55 | 0.0028604 |
| 1431282_at          | Med24                | X |   |   | -0.67 | 3.99  | -6.81 | 0.0004967 |
| 1433776_at          | Lhfp                 | X |   |   | -0.66 | 9.87  | -5.06 | 0.0057513 |
| <b>1426141_at</b>   | <b>Mrgpra1</b>       |   |   |   | -0.66 | 2.82  | -4.91 | 0.007271  |
| 1450807_at          | Ltb4r2               | X | X |   | -0.66 | 4.33  | -5.39 | 0.0035145 |
| 1454563_at          | 4930573C08Rik        | X |   |   | -0.66 | 3.45  | -6.16 | 0.0011725 |
| 1430264_at          | 2610030P05Rik        | X |   |   | -0.66 | 3.38  | -5.58 | 0.0027707 |
| <b>1449639_at</b>   | <b>Unknown</b>       |   |   |   | -0.65 | 2.34  | -8.26 | 0.0001263 |
| 1421707_at          | Tmc2                 | X |   |   | -0.65 | 2.92  | -7.74 | 0.0001902 |
| 1415852_at          | Impdh2               | X |   |   | -0.65 | 8.92  | -5.30 | 0.0039915 |
| <b>1450947_at</b>   | <b>2610528J11Rik</b> |   |   |   | -0.65 | 2.84  | -6.65 | 0.0006242 |
| 1457312_at          | Unknown              | X |   |   | -0.65 | 4.78  | -5.45 | 0.0032345 |
| 1442855_at          | Dopey1               | X | X |   | -0.64 | 4.12  | -5.64 | 0.0024921 |
| 1439386_x_at        | Mat2a                | X | X |   | -0.64 | 9.54  | -5.37 | 0.0036057 |
| 1420424_at          | 1700054O13Rik        | X |   |   | -0.64 | 3.47  | -6.20 | 0.0011041 |
| 1438586_at          | Tbx22                | X |   |   | -0.64 | 2.19  | -5.67 | 0.0023694 |
| 1444362_at          | Neurod2              | X |   |   | -0.64 | 4.24  | -5.48 | 0.0031044 |

|                     |                      |   |   |       |       |       |           |
|---------------------|----------------------|---|---|-------|-------|-------|-----------|
| 1440211_at          | Cyp2j11              | X |   | -0.64 | 3.34  | -6.09 | 0.0012769 |
| <b>1445043_at</b>   | <b>Unknown</b>       |   |   | -0.64 | 3.25  | -6.07 | 0.0013047 |
| 1447492_at          | Unknown              |   | X | -0.63 | 3.67  | -5.35 | 0.0037428 |
| 1460069_at          | Smc6                 | X |   | -0.63 | 2.59  | -5.68 | 0.0023458 |
| <b>1425596_at</b>   | <b>AI317395</b>      |   |   | -0.63 | 2.57  | -4.97 | 0.0065953 |
| 1457596_at          | Unknown              | X |   | -0.63 | 3.01  | -4.82 | 0.0082431 |
| 1440935_at          | Unknown              |   | X | -0.63 | 4.48  | -6.76 | 0.0005295 |
| 1444445_at          | C77648               | X |   | -0.63 | 3.50  | -6.00 | 0.0014542 |
| 1445376_at          | Unknown              | X |   | -0.63 | 3.57  | -4.88 | 0.0074683 |
| <b>1443764_x_at</b> | <b>Rab27b</b>        |   |   | -0.63 | 5.02  | -4.98 | 0.0064998 |
| 1418550_x_at        | Defa-rs1             | X |   | -0.63 | 6.07  | -4.97 | 0.0065953 |
| 1452486_a_at        | Cryaa                | X |   | -0.63 | 6.06  | -5.02 | 0.0061157 |
| <b>1443234_at</b>   | <b>BC088983</b>      |   |   | -0.63 | 3.14  | -6.16 | 0.0011762 |
| <b>1446405_at</b>   | <b>Myst3</b>         |   |   | -0.63 | 2.77  | -4.91 | 0.0071555 |
| 1430182_a_at        | 1700006J14Rik        |   | X | -0.63 | 2.75  | -5.35 | 0.0037332 |
| 1427893_a_at        | Pmvk                 | X |   | -0.62 | 11.76 | -5.90 | 0.00171   |
| 1432795_at          | 2310058F05Rik        | X |   | -0.62 | 2.73  | -4.81 | 0.0082489 |
| 1440114_x_at        | Kank3                |   | X | -0.62 | 3.71  | -5.63 | 0.0025246 |
| 1450550_at          | Ii5                  | X |   | -0.62 | 2.48  | -7.49 | 0.0002539 |
| 1444775_at          | Gpr107               | X |   | -0.62 | 3.68  | -4.83 | 0.0081351 |
| <b>1454502_at</b>   | <b>2900022B07Rik</b> |   |   | -0.62 | 3.34  | -6.51 | 0.0007421 |
| 1434741_at          | Rreb1                | X | X | -0.62 | 3.88  | -5.68 | 0.0023458 |
| 1447512_at          | Unknown              | X |   | -0.62 | 3.32  | -6.30 | 0.0009848 |
| 1428589_at          | Mrpl41               | X |   | -0.62 | 11.95 | -4.74 | 0.0090377 |
| 1447799_x_at        | 1700001P01Rik        | X |   | -0.62 | 3.22  | -6.39 | 0.000891  |
| 1428471_at          | Sorbs1               | X |   | -0.62 | 11.16 | -4.99 | 0.0063343 |
| <b>1426064_at</b>   | <b>Cyp3a44</b>       |   |   | -0.61 | 2.34  | -6.15 | 0.0011836 |
| 1437425_at          | Gdap1                |   | X | -0.61 | 4.85  | -6.24 | 0.0010628 |
| 1428588_a_at        | Mrpl41               | X |   | -0.61 | 12.17 | -6.24 | 0.0010564 |
| 1442259_at          | Unknown              | X |   | -0.61 | 2.90  | -4.85 | 0.007988  |
| <b>1449154_at</b>   | <b>Col11a1</b>       |   |   | -0.61 | 2.48  | -4.73 | 0.0092543 |
| <b>1458895_at</b>   | <b>Naa11</b>         |   |   | -0.61 | 3.33  | -4.93 | 0.0070017 |
| <b>1442897_at</b>   | <b>Fam13b</b>        |   |   | -0.60 | 3.06  | -5.43 | 0.003318  |
| 1459150_at          | Unknown              | X |   | -0.60 | 2.50  | -7.05 | 0.0003933 |
| 1459491_at          | D12Ertd673e          | X |   | -0.60 | 4.02  | -4.78 | 0.008669  |
| <b>1444782_at</b>   | <b>4930417H01Rik</b> |   |   | -0.60 | 3.95  | -4.76 | 0.0089279 |
| <b>1445869_at</b>   | <b>Unknown</b>       |   |   | -0.60 | 2.20  | -4.97 | 0.0065831 |
| <b>1451855_at</b>   | <b>Bcl7a</b>         |   |   | -0.60 | 2.73  | -5.81 | 0.0019417 |
| <b>1456450_at</b>   | <b>Unknown</b>       |   |   | -0.60 | 3.24  | -5.13 | 0.005129  |
| 1447990_at          | C76332               | X |   | -0.60 | 3.09  | -5.39 | 0.0035218 |
| 1421629_at          | Gabre                | X |   | -0.59 | 3.58  | -4.84 | 0.0080095 |
| <b>1443296_at</b>   | <b>Cdk16</b>         |   |   | -0.59 | 4.09  | -4.78 | 0.008669  |
| 1442864_at          | Esrra                | X |   | -0.59 | 4.48  | -4.78 | 0.0087047 |
| 1445947_at          | Unknown              | X |   | -0.59 | 2.47  | -6.07 | 0.0013035 |
| 1426435_at          | Tmem135              | X |   | -0.59 | 9.27  | -5.63 | 0.002544  |
| 1425933_a_at        | Nt5c2                | X |   | -0.59 | 9.22  | -5.29 | 0.0040453 |
| 1458942_at          | C230037E05Rik        | X |   | -0.59 | 2.75  | -5.41 | 0.0034579 |

|                     |                      |   |   |       |       |       |           |
|---------------------|----------------------|---|---|-------|-------|-------|-----------|
| 1429166_s_at        | Clmn                 | X |   | -0.58 | 6.71  | -4.96 | 0.0066182 |
| 1447286_at          | Unknown              | X |   | -0.58 | 2.56  | -5.39 | 0.0035145 |
| <b>1459926_at</b>   | <b>C77068</b>        |   |   | -0.58 | 2.32  | -4.69 | 0.0097058 |
| <b>1447639_x_at</b> | <b>Unknown</b>       |   |   | -0.57 | 2.34  | -5.31 | 0.0039344 |
| <b>1446389_at</b>   | <b>Unknown</b>       |   |   | -0.57 | 3.05  | -5.74 | 0.0021492 |
| 1449159_at          | Gnb3                 | X |   | -0.57 | 5.48  | -5.35 | 0.0037332 |
| <b>1421372_at</b>   | <b>Klk1b4</b>        |   |   | -0.57 | 3.45  | -4.79 | 0.0085247 |
| 1443301_at          | Unknown              | X |   | -0.56 | 2.18  | -6.59 | 0.0006711 |
| <b>1451708_at</b>   | <b>Gpr33</b>         |   |   | -0.56 | 3.16  | -5.10 | 0.0052869 |
| <b>1430916_at</b>   | <b>Fancd2</b>        |   |   | -0.56 | 3.14  | -6.21 | 0.0011041 |
| 1459097_at          | Unknown              |   | X | -0.56 | 3.38  | -5.19 | 0.0046707 |
| <b>1444672_at</b>   | <b>Unknown</b>       |   |   | -0.56 | 2.13  | -5.29 | 0.0040552 |
| <b>1459358_at</b>   | <b>Unknown</b>       |   |   | -0.56 | 4.19  | -4.84 | 0.0080138 |
| <b>1433298_at</b>   | <b>5830461L22Rik</b> |   |   | -0.56 | 3.00  | -5.12 | 0.0051313 |
| 1421770_a_at        | Tlx2                 | X |   | -0.56 | 5.73  | -5.12 | 0.005129  |
| <b>1422928_at</b>   | <b>Elane</b>         |   |   | -0.55 | 2.87  | -4.84 | 0.0080138 |
| 1459225_at          | Gnl3l                |   | X | -0.55 | 2.69  | -6.07 | 0.0013035 |
| 1447241_at          | Unknown              | X |   | -0.55 | 5.02  | -5.83 | 0.0018775 |
| 1456313_x_at        | Mrpl28               | X | X | -0.55 | 4.60  | -5.79 | 0.0019803 |
| <b>1431077_at</b>   | <b>Alpi</b>          |   |   | -0.53 | 3.20  | -4.75 | 0.0089279 |
| 1418645_at          | Hal                  | X |   | -0.53 | 4.28  | -4.82 | 0.0082431 |
| 1447598_x_at        | Polr1a               | X |   | -0.52 | 2.02  | -5.51 | 0.0030064 |
| <b>1444619_x_at</b> | <b>Psmb8</b>         |   |   | -0.52 | 3.00  | -4.68 | 0.0098536 |
| 1432064_at          | Ubox5                | X |   | -0.52 | 3.38  | -5.51 | 0.0030068 |
| 1433049_at          | 5730478J17Rik        | X |   | -0.52 | 2.41  | -6.22 | 0.0010938 |
| 1420161_at          | AA409749             |   | X | -0.52 | 4.11  | -6.03 | 0.0013842 |
| 1433438_x_at        | Mela                 | X |   | -0.51 | 2.75  | -5.55 | 0.0028604 |
| 1447599_x_at        | Epn2                 | X |   | -0.51 | 3.47  | -5.31 | 0.0039207 |
| <b>1446417_at</b>   | <b>Unknown</b>       |   |   | -0.51 | 2.16  | -4.81 | 0.0082712 |
| 1426308_at          | Mbd3l1               | X |   | -0.51 | 3.79  | -4.82 | 0.0082431 |
| 1429991_at          | Fezf1                |   | X | -0.51 | 4.07  | -5.35 | 0.0037332 |
| 1435889_at          | Mark2                | X |   | -0.50 | 9.68  | -4.75 | 0.0089279 |
| 1446491_at          | Unknown              | X |   | -0.50 | 3.35  | -5.18 | 0.0047944 |
| 1446683_at          | Eps15l1              | X |   | -0.50 | 5.41  | -4.94 | 0.006861  |
| <b>1422280_at</b>   | <b>Gzmk</b>          |   |   | -0.50 | 3.46  | -4.94 | 0.0068433 |
| <b>1431845_at</b>   | <b>Gm4640</b>        |   |   | -0.50 | 3.14  | -4.86 | 0.007779  |
| 1440577_at          | Unknown              | X | X | -0.50 | 3.78  | -5.12 | 0.005129  |
| <b>1420206_at</b>   | <b>Unknown</b>       |   |   | -0.50 | 2.59  | -5.20 | 0.0045926 |
| 1421253_at          | Nrap                 | X | X | -0.49 | 6.38  | -4.80 | 0.0083937 |
| 1459138_at          | Unknown              | X |   | -0.49 | 2.58  | -4.68 | 0.0099322 |
| 1427793_at          | Unknown              | X |   | -0.49 | 4.23  | -4.75 | 0.0089279 |
| 1449322_at          | Gm13363              | X |   | -0.49 | 10.57 | -4.69 | 0.0097407 |
| <b>1445993_at</b>   | <b>Unknown</b>       |   |   | -0.49 | 2.66  | -5.67 | 0.0023728 |
| 1433789_at          | Snhg3                | X |   | -0.49 | 4.80  | -4.71 | 0.0095593 |
| 1445187_at          | 9430070O13Rik        |   | X | -0.48 | 2.60  | -4.69 | 0.0097023 |
| 1449992_at          | Prss29               | X |   | -0.48 | 5.32  | -4.94 | 0.0068433 |
| 1458804_at          | Unknown              | X |   | -0.48 | 2.74  | -5.40 | 0.0035145 |

|                         |                      |   |   |   |       |       |       |           |
|-------------------------|----------------------|---|---|---|-------|-------|-------|-----------|
| 1417299_at              | Nek2                 | X |   |   | -0.47 | 3.10  | -4.69 | 0.0097407 |
| 1437603_at              | BC050777             | X | X |   | -0.47 | 3.61  | -5.28 | 0.0040552 |
| <b>1454435_at</b>       | <b>Unknown</b>       |   |   |   | -0.46 | 4.99  | -4.75 | 0.008978  |
| 1426221_at              | Vwa5a                | X |   |   | -0.46 | 8.34  | -4.68 | 0.0098204 |
| <i>upregulated in W</i> |                      |   |   |   |       |       |       |           |
| 1423147_at              | Mat1a                |   |   | X | 0.44  | 3.38  | 4.96  | 0.0067016 |
| 1458495_at              | Unknown              | X | X | X | 0.46  | 4.20  | 4.74  | 0.0090516 |
| <b>1448684_at</b>       | <b>Ppp1r2</b>        |   |   |   | 0.49  | 9.80  | 5.17  | 0.0048299 |
| 1455838_at              | Sifnl1               |   |   | X | 0.52  | 4.99  | 4.72  | 0.009312  |
| <b>1431410_at</b>       | <b>D16Ertd472e</b>   |   |   |   | 0.52  | 4.47  | 4.83  | 0.0081831 |
| 1432281_a_at            | Itgb6                | X | X | X | 0.53  | 2.94  | 5.56  | 0.0028493 |
| 1454129_at              | 4933416M06Rik        |   |   | X | 0.53  | 4.67  | 4.84  | 0.0081036 |
| 1447245_at              | Unknown              |   |   | X | 0.54  | 4.19  | 4.96  | 0.0066194 |
| 1433513_x_at            | Ndufa12              | X |   |   | 0.54  | 12.44 | 6.10  | 0.0012696 |
| 1444747_at              | Unknown              |   |   | X | 0.54  | 2.76  | 5.87  | 0.0017796 |
| 1444536_at              | Unknown              |   |   | X | 0.54  | 3.65  | 4.70  | 0.0095861 |
| 1450578_at              | Sry                  |   |   | X | 0.54  | 3.14  | 4.89  | 0.0074134 |
| <b>1432030_at</b>       | <b>4930434J06Rik</b> |   |   |   | 0.55  | 2.99  | 5.38  | 0.0035892 |
| 1424493_s_at            | Ugt3a1               |   |   | X | 0.56  | 4.08  | 5.61  | 0.0026134 |
| <b>1433245_at</b>       | <b>6720475M21Rik</b> |   |   |   | 0.56  | 3.79  | 5.51  | 0.0030064 |
| 1429796_at              | Kalrn                | X |   |   | 0.56  | 9.71  | 5.45  | 0.0032345 |
| 1449081_at              | Ces3                 |   |   | X | 0.58  | 2.57  | 6.24  | 0.0010628 |
| 1459735_at              | Fkbp15               |   |   | X | 0.58  | 4.03  | 4.82  | 0.0082485 |
| 1442629_at              | Unknown              |   |   | X | 0.58  | 3.61  | 4.78  | 0.0086254 |
| 1435825_at              | Acvrl1               | X |   |   | 0.58  | 4.39  | 4.91  | 0.0071555 |
| 1432751_at              | 4930403O18Rik        |   |   | X | 0.59  | 3.59  | 5.04  | 0.0058868 |
| 1451534_at              | Scgn                 |   |   | X | 0.60  | 4.47  | 4.82  | 0.0082431 |
| <b>1432074_at</b>       | <b>4930517E11Rik</b> |   |   |   | 0.61  | 3.81  | 4.75  | 0.0089279 |
| <b>1421481_at</b>       | <b>Unknown</b>       |   |   |   | 0.61  | 3.63  | 4.79  | 0.0085968 |
| <b>1458739_at</b>       | <b>Unknown</b>       |   |   |   | 0.61  | 2.96  | 5.34  | 0.0037814 |
| 1420061_s_at            | AA675344             |   |   | X | 0.62  | 2.64  | 5.09  | 0.0053747 |
| 1422276_at              | P2ry4                | X |   |   | 0.62  | 3.16  | 5.05  | 0.0058121 |
| 1442405_at              | Csrp2bp              |   |   | X | 0.62  | 3.62  | 5.68  | 0.0023458 |
| 1441289_at              | Unknown              | X |   |   | 0.64  | 2.69  | 5.11  | 0.0051633 |
| 1441103_at              | Unknown              | X |   |   | 0.65  | 3.66  | 5.80  | 0.0019598 |
| 1440124_at              | B230334C09Rik        |   |   | X | 0.65  | 3.42  | 5.16  | 0.0048945 |
| 1446274_at              | Slc16a1              | X | X |   | 0.66  | 3.34  | 5.05  | 0.0057606 |
| <b>1442999_at</b>       | <b>B930036G03Rik</b> |   |   |   | 0.66  | 9.95  | 5.98  | 0.0015107 |
| 1420784_at              | Scn11a               |   |   | X | 0.66  | 3.84  | 4.77  | 0.0087352 |
| <b>1439694_at</b>       | <b>Fbxw16</b>        |   |   |   | 0.66  | 4.35  | 5.29  | 0.0040453 |
| 1446027_at              | Unknown              |   |   | X | 0.67  | 4.45  | 5.37  | 0.0036393 |
| 1429858_at              | 1700011E24Rik        |   |   | X | 0.67  | 4.39  | 6.61  | 0.0006637 |
| 1443121_at              | Calcoco1             |   |   | X | 0.67  | 4.47  | 5.24  | 0.0043136 |
| 1446813_s_at            | D5Ertd560e           |   |   | X | 0.68  | 3.09  | 7.04  | 0.0003936 |
| 1444932_at              | 4732419C18Rik        |   |   | X | 0.68  | 4.83  | 4.67  | 0.0099657 |
| 1441177_at              | Unknown              | X |   |   | 0.68  | 3.86  | 6.21  | 0.0010947 |

|                   |                      |   |   |   |      |      |      |           |
|-------------------|----------------------|---|---|---|------|------|------|-----------|
| 1442146_at        | Unknown              | X |   |   | 0.68 | 3.96 | 6.58 | 0.0006747 |
| 1442467_at        | Nav2                 |   |   | X | 0.68 | 3.90 | 5.58 | 0.0027707 |
| 1458058_at        | 7030407E18Rik        |   |   | X | 0.68 | 3.76 | 5.01 | 0.0061553 |
| 1431908_at        | 4933408J17Rik        | X |   |   | 0.69 | 4.04 | 5.30 | 0.004031  |
| <b>1455974_at</b> | <b>1110049F12Rik</b> |   |   |   | 0.69 | 2.96 | 5.51 | 0.0030068 |
| <b>1429821_at</b> | <b>2810046L04Rik</b> |   |   |   | 0.69 | 2.89 | 5.17 | 0.0048333 |
| 1459892_at        | Psg19                |   |   | X | 0.69 | 2.57 | 6.68 | 0.0005907 |
| 1437326_x_at      | Cela3b               | X | X | X | 0.69 | 3.86 | 6.34 | 0.0009408 |
| 1438779_at        | Col4a3               |   |   | X | 0.70 | 3.44 | 5.50 | 0.0030193 |
| 1418286_a_at      | Efnb1                |   |   | X | 0.70 | 6.97 | 4.73 | 0.0092219 |
| <b>1453443_at</b> | <b>1110015O18Rik</b> |   |   |   | 0.70 | 2.64 | 4.72 | 0.009312  |
| 1436932_at        | Grhl3                |   |   | X | 0.70 | 3.55 | 4.76 | 0.0089204 |
| 1443025_at        | Unknown              |   |   | X | 0.70 | 3.31 | 4.99 | 0.0064308 |
| 1432578_at        | Naif1                |   |   | X | 0.71 | 5.89 | 6.30 | 0.0009848 |
| 1442485_at        | Unknown              |   |   | X | 0.71 | 3.45 | 7.11 | 0.0003663 |
| <b>1427361_at</b> | <b>Hoxc6</b>         |   |   |   | 0.71 | 4.83 | 5.24 | 0.0043136 |
| <b>1452402_at</b> | <b>Unknown</b>       |   |   |   | 0.72 | 2.66 | 5.52 | 0.0029829 |
| 1446788_at        | A430091L06Rik        | X |   |   | 0.72 | 3.49 | 5.38 | 0.0035997 |
| <b>1443426_at</b> | <b>Sltm</b>          |   |   |   | 0.72 | 2.75 | 6.87 | 0.0004633 |
| 1447134_at        | Unknown              |   |   | X | 0.72 | 3.59 | 5.51 | 0.0030064 |
| 1441155_at        | Unknown              |   |   | X | 0.72 | 3.24 | 6.30 | 0.0009848 |
| 1442573_at        | Unknown              |   |   | X | 0.72 | 3.22 | 6.95 | 0.0004207 |
| 1451951_at        | Igkv14-111           |   |   | X | 0.73 | 3.84 | 7.46 | 0.0002631 |
| <b>1441794_at</b> | <b>Unknown</b>       |   |   |   | 0.74 | 3.41 | 4.74 | 0.00908   |
| 1423714_at        | Asf1b                |   |   | X | 0.74 | 5.10 | 5.01 | 0.0061397 |
| <b>1447325_at</b> | <b>Unknown</b>       |   |   |   | 0.74 | 4.75 | 5.82 | 0.0019038 |
| 1447642_x_at      | Dmwd                 |   |   | X | 0.75 | 3.13 | 5.73 | 0.0021931 |
| 1430696_at        | Eif2ak1              | X |   |   | 0.76 | 4.90 | 7.70 | 0.0001985 |
| <b>1458610_at</b> | <b>Unknown</b>       |   |   |   | 0.76 | 3.58 | 6.56 | 0.0006886 |
| <b>1428802_at</b> | <b>Mgat3</b>         |   |   |   | 0.76 | 4.73 | 5.51 | 0.0030064 |
| 1422802_at        | Defa3                |   |   | X | 0.76 | 3.77 | 5.55 | 0.002862  |
| 1425289_a_at      | Cr2                  | X |   |   | 0.77 | 4.07 | 5.29 | 0.0040552 |
| <b>1430098_at</b> | <b>6330409D20Rik</b> |   |   |   | 0.77 | 4.46 | 5.18 | 0.0047944 |
| 1449866_at        | Syt2                 |   |   | X | 0.78 | 4.90 | 5.27 | 0.0041275 |
| <b>1441435_at</b> | <b>Unknown</b>       |   |   |   | 0.78 | 3.29 | 4.89 | 0.0074134 |
| <b>1456539_at</b> | <b>Unknown</b>       |   |   |   | 0.78 | 2.45 | 5.12 | 0.0051633 |
| 1454291_at        | 4933428P19Rik        | X |   |   | 0.79 | 3.91 | 8.20 | 0.0001278 |
| 1432626_at        | 5730507A11Rik        |   |   | X | 0.79 | 4.00 | 7.80 | 0.0001773 |
| 1432500_at        | 2410006F04Rik        |   |   | X | 0.79 | 2.93 | 7.27 | 0.0003198 |
| 1430299_at        | Tsc22d4              |   |   | X | 0.79 | 6.75 | 4.95 | 0.006763  |
| 1420991_at        | Ankrd1               | X | X | X | 0.80 | 3.67 | 7.20 | 0.0003341 |
| <b>1454736_at</b> | <b>Ankrd57</b>       |   |   |   | 0.80 | 7.73 | 4.91 | 0.0071555 |
| 1445149_at        | Pvr                  |   |   | X | 0.80 | 4.11 | 6.87 | 0.0004608 |
| 1430653_at        | A930026B05Rik        |   |   | X | 0.81 | 4.61 | 5.97 | 0.0015224 |
| <b>1446188_at</b> | <b>Cep97</b>         |   |   |   | 0.81 | 3.69 | 7.47 | 0.0002617 |
| 1427756_x_at      | Igh-6                |   |   | X | 0.81 | 3.68 | 5.39 | 0.0035145 |
| 1447080_at        | Aco1                 |   |   | X | 0.81 | 4.50 | 5.60 | 0.0026882 |

|                     |                |   |      |      |      |           |
|---------------------|----------------|---|------|------|------|-----------|
| <b>1432852_at</b>   | <b>Phactr1</b> |   | 0.82 | 3.29 | 5.50 | 0.0030276 |
| <b>1419589_at</b>   | <b>Cd93</b>    |   | 0.82 | 3.16 | 4.94 | 0.0068607 |
| 1446628_at          | Unknown        | X | 0.83 | 4.08 | 8.08 | 0.000136  |
| <b>1440813_s_at</b> | <b>Plxnb3</b>  |   | 0.84 | 4.60 | 5.89 | 0.0017466 |
| <b>1430706_at</b>   | <b>Pebp4</b>   |   | 0.84 | 2.67 | 7.37 | 0.0002897 |
| <b>1447437_at</b>   | <b>Unknown</b> |   | 0.85 | 3.15 | 6.93 | 0.0004235 |
| 1449572_at          | Trhr           | X | 0.85 | 3.24 | 4.92 | 0.0070464 |
| 1429611_at          | 1700034E13Rik  | X | 0.85 | 5.20 | 7.18 | 0.0003341 |
| 1433224_at          | 5830442K09Rik  | X | 0.85 | 3.33 | 7.57 | 0.0002404 |
| 1417852_x_at        | Clca1          | X | 0.85 | 2.81 | 7.79 | 0.0001773 |
| 1447128_at          | C330013J21Rik  | X | 0.85 | 4.05 | 6.35 | 0.0009249 |
| 1454788_at          | Arl4c          | X | 0.86 | 8.96 | 6.61 | 0.0006637 |
| 1429402_at          | Glt8d2         | X | 0.86 | 5.41 | 4.82 | 0.0082485 |
| 1439929_at          | Unknown        | X | 0.87 | 2.96 | 8.16 | 0.0001295 |
| <b>1430145_at</b>   | <b>Lrrc28</b>  |   | 0.87 | 3.99 | 4.79 | 0.008561  |
| 1442081_at          | Gm4632         | X | 0.87 | 4.51 | 6.75 | 0.0005323 |
| 1444354_at          | Unknown        | X | 0.87 | 4.69 | 8.66 | 7.43E-05  |
| 1442331_at          | Unknown        | X | 0.88 | 3.72 | 8.01 | 0.0001497 |
| <b>1419179_at</b>   | <b>Txn14a</b>  |   | 0.89 | 8.62 | 5.14 | 0.0050483 |
| 1446751_s_at        | Impact         | X | 0.89 | 6.55 | 5.81 | 0.0019351 |
| 1431564_at          | Bcar3          | X | 0.89 | 3.60 | 5.73 | 0.0021931 |
| 1417878_at          | E2f1           | X | 0.89 | 6.82 | 4.72 | 0.009335  |
| 1447851_x_at        | Atp10a         | X | 0.90 | 4.62 | 5.50 | 0.0030193 |
| 1441441_at          | Prrg1          | X | 0.91 | 3.33 | 5.57 | 0.0027888 |
| 1419717_at          | Sema3e         | X | 0.91 | 3.23 | 4.90 | 0.0072832 |
| <b>1445164_at</b>   | <b>Unknown</b> |   | 0.92 | 2.82 | 5.24 | 0.0043136 |
| <b>1446047_at</b>   | <b>Unknown</b> |   | 0.93 | 4.31 | 6.88 | 0.0004555 |
| 1445433_at          | Glt8d2         | X | 0.93 | 3.05 | 4.83 | 0.0081442 |
| <b>1454305_at</b>   | <b>Cbx3</b>    |   | 0.94 | 4.19 | 5.51 | 0.0030064 |
| <b>1458202_at</b>   | <b>Fam65b</b>  |   | 0.95 | 5.97 | 5.10 | 0.0052623 |
| 1437563_at          | Phf20l1        | X | 0.95 | 4.89 | 4.98 | 0.0064998 |
| <b>1421009_at</b>   | <b>Rsad2</b>   |   | 0.96 | 3.78 | 4.75 | 0.0089279 |
| 1419075_s_at        | Saa1           | X | 0.96 | 4.03 | 7.19 | 0.0003341 |
| 1431038_at          | Rassf4         | X | 0.97 | 3.34 | 5.59 | 0.0027165 |
| 1444457_at          | Unknown        | X | 0.97 | 5.27 | 5.40 | 0.0035039 |
| <b>1446899_at</b>   | <b>Unknown</b> |   | 0.98 | 2.87 | 5.04 | 0.0058868 |
| <b>1441669_at</b>   | <b>Acap2</b>   |   | 0.98 | 4.38 | 4.75 | 0.0089279 |
| 1423473_at          | Sept2          | X | 0.98 | 2.96 | 5.77 | 0.0020269 |
| <b>1421601_at</b>   | <b>Gsx2</b>    |   | 0.98 | 3.21 | 4.72 | 0.009298  |
| <b>1431306_at</b>   | <b>Nt5c3</b>   |   | 0.99 | 3.55 | 6.15 | 0.0011856 |
| <b>1458374_at</b>   | <b>C79407</b>  |   | 0.99 | 2.84 | 6.39 | 0.000891  |
| 1458755_at          | Unknown        | X | 0.99 | 3.04 | 7.06 | 0.000388  |
| 1431263_at          | Prkag2         | X | 0.99 | 3.09 | 7.51 | 0.0002499 |
| <b>1441690_at</b>   | <b>Cdh8</b>    |   | 0.99 | 2.65 | 4.83 | 0.0082021 |
| 1422942_at          | Galr2          | X | 0.99 | 3.97 | 5.83 | 0.0018775 |
| 1440048_at          | Smarca5        | X | 1.00 | 3.19 | 6.72 | 0.0005608 |
| 1440711_at          | C630001G18Rik  | X | 1.01 | 3.22 | 6.58 | 0.0006747 |

|                     |                      |   |   |   |      |      |       |           |
|---------------------|----------------------|---|---|---|------|------|-------|-----------|
| 1442228_at          | Unknown              | X |   | X | 1.02 | 3.45 | 10.26 | 1.92E-05  |
| 1445236_at          | Unknown              | X |   |   | 1.02 | 3.83 | 8.44  | 9.69E-05  |
| <b>1429468_at</b>   | <b>1110018F16Rik</b> |   |   |   | 1.03 | 7.32 | 5.80  | 0.0019569 |
| 1445309_at          | Unknown              | X |   |   | 1.04 | 5.06 | 6.83  | 0.0004807 |
| <b>1437063_at</b>   | <b>Fem1a</b>         |   |   |   | 1.04 | 7.43 | 5.18  | 0.0047461 |
| <b>1426016_a_at</b> | <b>Tro</b>           |   |   |   | 1.04 | 6.45 | 4.78  | 0.0086254 |
| 1437124_at          | A630052C17Rik        | X |   |   | 1.04 | 6.00 | 5.31  | 0.0039132 |
| 1441395_at          | AU021933             | X |   |   | 1.05 | 4.21 | 6.12  | 0.0012327 |
| 1417877_at          | Eepd1                | X |   |   | 1.05 | 7.46 | 6.33  | 0.0009471 |
| <b>1425291_at</b>   | <b>Foxj1</b>         |   |   |   | 1.06 | 7.07 | 4.93  | 0.0069444 |
| <b>1448983_at</b>   | <b>Cdrt4</b>         |   |   |   | 1.07 | 5.30 | 5.36  | 0.0036397 |
| <b>1455528_at</b>   | <b>Unknown</b>       |   |   |   | 1.08 | 5.73 | 4.85  | 0.0078842 |
| <b>1450956_at</b>   | <b>LOC100048724</b>  |   |   |   | 1.08 | 6.16 | 5.01  | 0.006175  |
| <b>1442030_at</b>   | <b>Unknown</b>       |   |   |   | 1.08 | 4.17 | 6.38  | 0.0008924 |
| <b>1421303_at</b>   | <b>Ikzf1</b>         |   |   |   | 1.09 | 5.19 | 4.81  | 0.0083337 |
| 1444308_at          | Unknown              |   |   | X | 1.09 | 4.78 | 5.74  | 0.0021513 |
| <b>1458404_at</b>   | <b>Ndufb8</b>        |   |   |   | 1.09 | 5.51 | 4.74  | 0.0091095 |
| 1430436_at          | Fam115a              |   |   | X | 1.10 | 3.09 | 6.78  | 0.0005155 |
| 1435560_at          | Itgal                | X | X | X | 1.10 | 3.85 | 6.79  | 0.0005096 |
| 1427497_at          | 2610015P09Rik        |   |   | X | 1.10 | 4.38 | 8.77  | 6.63E-05  |
| 1421686_at          | Npvf                 |   |   | X | 1.11 | 4.43 | 9.11  | 4.97E-05  |
| <b>1456998_at</b>   | <b>Dbpht2</b>        |   |   |   | 1.11 | 4.21 | 4.83  | 0.0082191 |
| <b>1430212_at</b>   | <b>Zfp712</b>        |   |   |   | 1.11 | 3.23 | 4.81  | 0.0082675 |
| <b>1418603_at</b>   | <b>Avpr1a</b>        |   |   |   | 1.11 | 4.26 | 5.45  | 0.0032345 |
| 1446175_at          | Unknown              |   |   | X | 1.12 | 3.48 | 8.90  | 5.88E-05  |
| <b>1446119_at</b>   | <b>Unknown</b>       |   |   |   | 1.13 | 4.81 | 5.55  | 0.002862  |
| 1431397_at          | 3110099E03Rik        | X |   |   | 1.15 | 4.08 | 8.07  | 0.000136  |
| 1457093_at          | Gapvd1               |   |   | X | 1.15 | 3.58 | 7.98  | 0.0001535 |
| 1448577_x_at        | Syngr2               |   |   | X | 1.15 | 7.39 | 5.61  | 0.0026134 |
| <b>1436002_at</b>   | <b>Scube3</b>        |   |   |   | 1.15 | 4.92 | 6.11  | 0.0012527 |
| <b>1434762_at</b>   | <b>Orai2</b>         |   |   |   | 1.15 | 5.74 | 4.85  | 0.0079963 |
| 1454361_at          | 9230106L01Rik        |   |   | X | 1.16 | 3.28 | 6.81  | 0.0005003 |
| <b>1429284_at</b>   | <b>Mobkl2b</b>       |   |   |   | 1.16 | 5.43 | 6.23  | 0.0010628 |
| 1450260_at          | Grpr                 | X |   |   | 1.16 | 4.51 | 5.45  | 0.0032474 |
| <b>1429250_at</b>   | <b>Dync2h1</b>       |   |   |   | 1.16 | 4.69 | 4.68  | 0.0099388 |
| 1456681_at          | Ptchd1               |   |   | X | 1.17 | 6.05 | 6.49  | 0.0007813 |
| 1437370_at          | Sgol2                |   |   | X | 1.17 | 4.15 | 5.01  | 0.0061553 |
| 1435794_at          | BC050254             |   |   | X | 1.18 | 5.84 | 5.75  | 0.0021243 |
| 1423367_at          | Wnt7a                | X |   |   | 1.18 | 8.80 | 6.03  | 0.0013932 |
| 1441074_at          | Unknown              |   |   | X | 1.19 | 4.40 | 7.74  | 0.0001902 |
| 1430330_at          | Wiz                  |   |   | X | 1.20 | 3.53 | 6.07  | 0.0013035 |
| 1444163_at          | Nek5                 | X |   |   | 1.21 | 3.99 | 4.73  | 0.0092254 |
| <b>1436633_at</b>   | <b>Unknown</b>       |   |   |   | 1.22 | 7.02 | 5.10  | 0.0052869 |
| 1427618_at          | Cdh9                 |   |   | X | 1.23 | 3.61 | 6.43  | 0.0008376 |
| <b>1435116_at</b>   | <b>4933403G14Rik</b> |   |   |   | 1.23 | 5.21 | 4.96  | 0.0067016 |
| 1444207_at          | Alms1                |   |   | X | 1.24 | 3.63 | 5.20  | 0.0046301 |
| 1453395_at          | 5330403D14Rik        |   |   | X | 1.24 | 3.82 | 8.22  | 0.0001263 |

|                   |                      |   |   |      |      |       |           |
|-------------------|----------------------|---|---|------|------|-------|-----------|
| 1445653_at        | BC031361             | X |   | 1.24 | 4.05 | 7.92  | 0.0001635 |
| 1446785_at        | Unknown              | X |   | 1.25 | 3.30 | 5.14  | 0.0050483 |
| 1438515_at        | Zfp207               |   | X | 1.25 | 4.67 | 5.24  | 0.0043136 |
| 1430464_at        | 9430021M05Rik        | X |   | 1.25 | 5.82 | 5.51  | 0.0030064 |
| 1431362_a_at      | Smoc2                |   | X | 1.27 | 4.61 | 6.29  | 0.0009877 |
| <b>1436107_at</b> | <b>Naa38</b>         |   |   | 1.27 | 5.90 | 5.28  | 0.0040629 |
| 1460073_at        | Unknown              |   | X | 1.29 | 3.90 | 6.57  | 0.000683  |
| 1445505_at        | Ndst1                |   | X | 1.29 | 3.59 | 5.71  | 0.0022589 |
| 1459716_at        | AI835735             | X |   | 1.29 | 5.54 | 5.32  | 0.0038815 |
| <b>1429443_at</b> | <b>Cpne4</b>         |   |   | 1.31 | 5.42 | 4.89  | 0.0074446 |
| 1443707_at        | 2900046B09Rik        | X |   | 1.34 | 4.04 | 6.47  | 0.0007931 |
| 1459255_at        | Unknown              |   | X | 1.35 | 3.17 | 7.19  | 0.0003341 |
| 1460744_at        | Unknown              | X |   | 1.36 | 5.08 | 7.35  | 0.0002989 |
| <b>1422889_at</b> | <b>Pcdh18</b>        |   |   | 1.37 | 3.46 | 4.95  | 0.006763  |
| 1440862_at        | Unknown              |   | X | 1.39 | 4.48 | 5.65  | 0.0024596 |
| 1432268_at        | 2310068J16Rik        | X |   | 1.42 | 5.94 | 5.51  | 0.0030068 |
| 1447178_at        | Unknown              | X |   | 1.43 | 4.65 | 5.93  | 0.0016195 |
| 1459618_at        | Unknown              | X |   | 1.43 | 3.99 | 8.62  | 7.67E-05  |
| <b>1420938_at</b> | <b>Hs6st2</b>        |   |   | 1.44 | 6.34 | 4.83  | 0.0081877 |
| 1422530_at        | Prph                 |   | X | 1.45 | 4.06 | 5.58  | 0.002759  |
| 1444269_at        | Unknown              |   | X | 1.49 | 3.68 | 8.11  | 0.0001335 |
| 1447552_s_at      | Unknown              |   | X | 1.53 | 3.24 | 5.24  | 0.0043083 |
| <b>1426033_at</b> | <b>Rgs9</b>          |   |   | 1.54 | 4.47 | 4.81  | 0.0082489 |
| 1422907_at        | Gnat2                | X |   | 1.55 | 3.92 | 8.88  | 5.88E-05  |
| 1441311_at        | Rps6ka2              | X |   | 1.56 | 4.42 | 6.75  | 0.0005323 |
| 1447268_at        | Nol12                | X |   | 1.57 | 4.62 | 7.04  | 0.0003933 |
| 1458620_at        | Gm5129               |   | X | 1.60 | 5.38 | 6.85  | 0.0004773 |
| 1456729_x_at      | Rtel1                | X |   | 1.60 | 4.25 | 7.60  | 0.0002338 |
| 1425669_at        | Mobkl2b              | X | X | 1.61 | 3.94 | 9.92  | 2.38E-05  |
| 1434070_at        | Jag1                 | X |   | 1.61 | 6.26 | 5.12  | 0.0051633 |
| 1446761_at        | D8Ertd56e            |   | X | 1.68 | 3.33 | 8.23  | 0.0001263 |
| <b>1445763_at</b> | <b>1700013F07Rik</b> |   |   | 1.73 | 4.78 | 6.38  | 0.0008992 |
| 1444559_at        | Phtf2                |   | X | 1.79 | 4.06 | 6.59  | 0.0006711 |
| <b>1441389_at</b> | <b>Unknown</b>       |   |   | 1.81 | 3.45 | 7.18  | 0.0003341 |
| <b>1443246_at</b> | <b>Fastkd2</b>       |   |   | 1.81 | 5.13 | 7.85  | 0.0001703 |
| 1456670_at        | A930007A09Rik        | X |   | 1.82 | 4.06 | 7.54  | 0.000246  |
| <b>1436540_at</b> | <b>Mirlet7d</b>      |   |   | 2.03 | 4.92 | 6.94  | 0.0004235 |
| 1429955_at        | 5031434O11Rik        | X | X | 2.03 | 4.48 | 10.41 | 1.92E-05  |
| <b>1429616_at</b> | <b>Zfp91</b>         |   |   | 2.07 | 5.24 | 6.44  | 0.0008367 |
| <b>1442708_at</b> | <b>Unknown</b>       |   |   | 2.11 | 4.62 | 5.14  | 0.0049998 |
